# Supplementary material for: Genomic Evolution of Vibrio cholerae O1 El Tor Strains and Climatic Factors in Driving Cholera Surges in Dhaka, Bangladesh, 1996-2024
Source: Research Square preprint supplement (doi:10.21203/rs.3.rs-7203192/v1), 2025-11-10
Supplement: Supplementary file 1 [file db06e259e28a8424c824565e.docx]

**Genomic Evolution of *Vibrio cholerae*** **O1 El Tor Strains and Climatic Factors in Driving Cholera Surges in Dhaka, Bangladesh, 1996-2024**

Md Mamun Monir1, Khalilur Rahman1, Mohammad Tarequl Islam1, Marzia Sultana1, Wali Ullah1, Sardar Muhammad Osail1, Shirajum Monira1, Kimberley D. Seed2, Andrew Camilli3, Carla Mavian4, Nicholas Thomson5,6, Rita R. Colwell7,8, ASG Faruque1, Tahmeed Ahmed1, and Munirul Alam1

1icddr,b, International Centre for Diarrhoeal Disease Research, Bangladesh, Dhaka, Bangladesh

2Department of Plant and Microbial Biology, University of California, Berkeley, Berkeley, CA 94720, USA

3Department Molecular Biology and Microbiology, Tufts University, USA

4Emerging Pathogens Institute, Department of Pathology, College of Medicine, University of Florida, Florida, 32601, USA

5Parasites and Microbes Program, Wellcome Sanger Institute, Wellcome Genome Campus, Hinxton, Cambridge CB10 1SA, UK

6London School of Hygiene and Tropical Medicine, London, UK

7Cell Biology and Molecular Genetics, University of Maryland, College Park, MD, USA

8University of Maryland Institute for Advanced Computer Studies, College Park, MD, USA

**Supplementary note 1:**

**Yearly cholera cases and seasonal variation (1996-2010 and 2011-2024)**

In Figure 1a, we observed two different patterns in the annual number of cases before and after 2010. To investigate details, we tabulated the total number of cases (median, minimum, and maximum) across two periods: 1996–2010 and 2011–2024 (**Supplementary Table 6**). A substantial decline was observed in the later period 2011–2024, the median of annual confirmed cholera cases significantly dropped from 536 (range: 284-1109) to 265.5 (range: 104-575) (Wilcoxon rank-sum test, p<0.001). Seasonal cases (Pre-monsoon, and post-monsoon) was also significantly declined (χ²=85.68, p<0.001) during 2011-2024 on average (**Supplementary Table 7**). Majority of yearly cholera in 2011-2024 period occurred in pre-monsoon (42.8%) and 25.1% of yearly cholera cases occurred during the pre-monsoon (March-May) and post-monsoon (September-November) seasons, respectively, whereas during these seasonal periods in the 1996-2010 were 34.4% and 30.6%, respectively. These results suggest significant reduction of the percentage of post-monsoon cholera in Dhaka in the recent years.

**Participant characteristics of the cholera patients**

**Age, sex, and father education**: The distributions of cholera cases among different age groups (infants, children, adults, older adults) changed significantly (χ²=329.81, p<0.001) between the two time periods (**Supplementary Table 8**). Adults remained the most affected group, with their case proportion increasing from 48.4% in the 1996-2010 period to 61.7% in the 2011-2024 period, while the proportions of infant (25.9% to 16.4%) and child (17.3% to 10%) cases declined. In both periods, males were more affected than females (1996-2010: Male 55.2% and Female 44.8%; 2011-2024: Male 59.8% and Female 40.2%). The father's education showed a significant association with cholera risk. In 1996-2010, 64.4% of cases had no parental education, while this proportion dropped to 56.9% in 2011-2014. Interestingly, the percentage of cholera cases whose fathers had some formal education (especially 4-5 years) increased in 2011-2024.

**Patients living conditions**: Common households accounted for most of the cholera cases in both periods. Significant improvements were observed in housing materials and infrastructure, but cholera cases increased substantially among cemented floors from 59.7% in 1996-2010 to 89.3% in the 2011-2024 period. The household wall (χ² =2509.03, p<0.001) and roof type (χ²=4350.06, p<0.001) differed significantly among cholera cases between the periods. In 1996-2010, cholera cases were most common among brick walls, followed by bamboo (22.2%), and corrugated tin (18.1%). In 2011-2024, brick walls become overwhelmingly dominant (78.3%), declining in other materials. The majority of cholera cases were from homes with corrugated tin roofs (63.4%) and concrete roofs (19.8%) in 1996-2010, however, concrete roofs became the most common (43.3%), and corrugated tin dropped to 4.2% in 2011-2024. Cholera cases were primarily associated with semi-sanitary (55.2%), dughole (23.3%), and open pit (11.8%) toilets in 1996-2010. In contrast, semi-sanitary toilets accounted for the vast majority of cases (88.4%) in 2011-2024, no-fixed place, and hanging toilets became rare in recent times.

**Clinical symptoms**: Regarding the clinical symptoms of cholera, dehydration, number of stools, vomiting, and abdominal pain among cholera cases differed significantly (p-value < 0.001) in both periods, but stool character (p-value=0.466), mucus or blood in stool (p-value=0.206) among cholera cases were independent of time period. Most of the patients had no visible mucus in their stools during both periods. The proportion of patients with severe dehydration increased from 60.1% in 1996-2010 to 73% in the 2011-2024 period. Additionally, 28.7% cholera cases experienced 16-20 stools per day, and 19% experienced more than 21 stools per day, compared to 13.4% and 9.4% respectively, during 1996-2010. Moreover, 55.7% of cases reported abdominal pain in 2011-2024, up from 46.6% in the earlier period, indicating a rise in severe clinical symptoms in cholera patients.
