# Supplementary material for: Genomic Evolution of Vibrio cholerae O1 El Tor Strains and Climatic Factors in Driving Cholera Surges in Dhaka, Bangladesh, 1996-2024
Source: Research Square preprint supplement (doi:10.21203/rs.3.rs-7203192/v1), 2025-11-10
Supplement: Supplementary file 2 [file f748e43f3894e678ff1bcfb0.xlsx]

## Sheet: Suppl Table 1
Supplementary table 1. List of V. cholerae strains used in this study
Analysis ID	Strain_ID	Year	Lineage	ctxB in silico	Serotype	Source	PLE	VSP-2 (missing/truncated genes)	VSP2_types	EBI-ENA	Reference
BD_1991_ERR018122	MG116025	1991	BD-0	ctxB3	Ogawa	No data	PLE(-)	VC0512	sporadic	ERR018122	Mutreja et al. Nature 2011
BD_1991_ERR019883	4670	1991	BD-0	ctxB1	Inaba	No data	PLE(-)	VC0490, VC0491, VC0513, VC0514, VC0515	sporadic	ERR019883	Mutreja et al. Nature 2011
BD_1994_ERR018120	MJ1485	1994	BD-0	ctxB1	Inaba	No data	PLE_4	NA	NA	ERR018120	Mutreja et al. Nature 2011
BD_1994_ERR018179	A346_2	1994	BD-0	ctxB1	Ogawa	No data	PLE_4	VC0489, VC0514	sporadic	ERR018179	Mutreja et al. Nature 2011
BD_1994_ERR025392	A346_1	1994	BD-0	ctxB1	Ogawa	No data	PLE_4	NA	NA	ERR025392	Mutreja et al. Nature 2011
BD_1999_ERR018114	4679	1999	BD-1	ctxB1	Ogawa	No data	PLE(-)	NC_002505.1_cds_WP_306461095.1_14, VC0495, VC0496, VC0497, VC0498, VC0499, VC0501, VC0502, VC0503, VC0504, VC0505, VC0506, VC0508, VC0509, VC0510, VC0512, VC0513	Var4*	ERR018114	Mutreja et al. Nature 2011
BD_2000_ERR019884	4672	2000	BD-0	ctxB1	Ogawa	No data	PLE(-)	VC0490, VC0513, VC0514, VC0515	sporadic	ERR019884	Mutreja et al. Nature 2011
BD_2001_ERR018116	4661	2001	BD-1	partial_assembly	Ogawa	No data	PLE(-)	NC_002505.1_cds_WP_306461095.1_14, VC0490, VC0495, VC0496, VC0497, VC0498, VC0499, VC0501, VC0502, VC0503, VC0504, VC0505, VC0506, VC0508, VC0509, VC0510, VC0512, VC0513, VC0514, VC0515	Var4*	ERR018116	Mutreja et al. Nature 2011
BD_2001_ERR018115	4663	2001	BD-1	ctxB1	Ogawa	No data	PLE(-)	NC_002505.1_cds_WP_306461095.1_14, VC0495, VC0496, VC0497, VC0498, VC0499, VC0501, VC0502, VC0503, VC0504, VC0505, VC0506, VC0508, VC0509, VC0510, VC0512	Var-4	ERR018115	Mutreja et al. Nature 2011
BD_2001_ERR025373	4662	2001	BD-1	ctxB1	Ogawa	No data	PLE(-)	NC_002505.1_cds_WP_306461095.1_14, VC0495, VC0496, VC0497, VC0498, VC0499, VC0501, VC0502, VC0503, VC0504, VC0505, VC0506, VC0508, VC0509, VC0510, VC0512	Var-4	ERR025373	Mutreja et al. Nature 2011
BD_2004_DRR335691	MAB001	2004	BD-1	ctxB1	No data	Environmental	PLE(-)	NC_002505.1_cds_WP_306461095.1_14, VC0495, VC0496, VC0497, VC0498, VC0499, VC0501, VC0502, VC0503, VC0504, VC0505, VC0506, VC0508, VC0509, VC0510, VC0512	Var-4	DRR335691	Monir et al. mSpectrum 2022
BD_2004_DRR335692	MAB002	2004	BD-1.1	ctxB7	No data	Clinical	PLE(-)	NC_002505.1_cds_WP_306461095.1_14, VC0495, VC0496, VC0497, VC0498, VC0499, VC0501, VC0502, VC0503, VC0504, VC0505, VC0506, VC0508, VC0509, VC0510, VC0512	Var-4	DRR335692	Monir et al. mSpectrum 2022
BD_2004_DRR335693	MAB003	2004	BD-2	ctxB1	No data	Clinical	PLE_1	VC0495, VC0496, VC0497, VC0498, VC0499	Var-2	DRR335693	Monir et al. mSpectrum 2022
BD_2005_DRR335697	MAB007	2005	BD-1	ctxB1	No data	Clinical	PLE(-)	NC_002505.1_cds_WP_306461095.1_14, VC0495, VC0496, VC0497, VC0498, VC0499, VC0501, VC0502, VC0503, VC0504, VC0505, VC0506, VC0508, VC0509, VC0510, VC0512	Var-4	DRR335697	Monir et al. mSpectrum 2022
BD_2005_DRR335695	MAB005	2005	BD-1	ctxB1	No data	Environmental	PLE_2	NC_002505.1_cds_WP_306461095.1_14, VC0495, VC0496, VC0497, VC0498, VC0499, VC0501, VC0502, VC0503, VC0504, VC0505, VC0506, VC0508, VC0509, VC0510, VC0512	Var-4	DRR335695	Monir et al. mSpectrum 2022
BD_2005_DRR335694	MAB004	2005	BD-2	ctxB1	No data	Environmental	PLE(-)	VC0495, VC0496, VC0497, VC0498, VC0499	Var-2	DRR335694	Monir et al. mSpectrum 2022
BD_2005_DRR335696	MAB006	2005	BD-2	ctxB1	No data	Clinical	PLE(-)	VC0495, VC0496, VC0497, VC0498, VC0499	Var-2	DRR335696	Monir et al. mSpectrum 2022
BD_2006_ERR018128	A488_2	2006	BD-1	ctxB1	Ogawa	No data	PLE(-)	NC_002505.1_cds_WP_306461095.1_14, VC0495, VC0496, VC0497, VC0498, VC0499, VC0501, VC0502, VC0503, VC0504, VC0505, VC0506, VC0508, VC0509, VC0510, VC0512	Var-4	ERR018128	Mutreja et al. Nature 2011
BD_2006_ERR025393	A488_1	2006	BD-1	ctxB1	Ogawa	No data	PLE(-)	NC_002505.1_cds_WP_306461095.1_14, VC0495, VC0496, VC0497, VC0498, VC0499, VC0501, VC0502, VC0503, VC0504, VC0505, VC0506, VC0508, VC0509, VC0510, VC0512	Var-4	ERR025393	Mutreja et al. Nature 2011
BD_2006_DRR335698	MAB008	2006	BD-2	ctxB1	No data	Environmental	PLE(-)	VC0495, VC0496, VC0497, VC0498, VC0499	Var-2	DRR335698	Monir et al. mSpectrum 2022
BD_2007_DRR335701	MAB012	2007	BD-1	ctxB1	No data	Clinical	PLE(-)	VC0495, VC0496, VC0497, VC0498	Var1	DRR335701	Monir et al. mSpectrum 2022
BD_2007_ERR018182	A487_2	2007	BD-1	ctxB1	Inaba	No data	PLE(-)	NC_002505.1_cds_WP_306461095.1_14, VC0489, VC0495, VC0496, VC0497, VC0498, VC0499, VC0501, VC0502, VC0503, VC0504, VC0505, VC0506, VC0508, VC0509, VC0510, VC0512, VC0514	Var4*	ERR018182	Mutreja et al. Nature 2011
BD_2007_ERR025395	A487_1	2007	BD-1	ctxB1	Inaba	No data	PLE(-)	NC_002505.1_cds_WP_306461095.1_14, VC0495, VC0496, VC0497, VC0498, VC0499, VC0501, VC0502, VC0503, VC0504, VC0505, VC0506, VC0508, VC0509, VC0510, VC0512	Var-4	ERR025395	Mutreja et al. Nature 2011
BD_2007_DRR335609	BGD006	2007	BD-1	ctxB1	No data	Clinical	PLE_2	NC_002505.1_cds_WP_306461095.1_14, VC0495, VC0496, VC0497, VC0498, VC0499, VC0501, VC0502, VC0503, VC0504, VC0505, VC0506, VC0508, VC0509, VC0510, VC0512	Var-4	DRR335609	Monir et al. mSpectrum 2022
BD_2007_DRR335607	BGD004	2007	BD-1	ctxB1	No data	Clinical	PLE_2	NC_002505.1_cds_WP_306461095.1_14, VC0495, VC0496, VC0497, VC0498, VC0499, VC0501, VC0502, VC0503, VC0504, VC0505, VC0506, VC0508, VC0509, VC0510, VC0512	Var-4	DRR335607	Monir et al. mSpectrum 2022
BD_2007_DRR335615	BGD012	2007	BD-1	ctxB1	No data	Clinical	PLE_2	NC_002505.1_cds_WP_306461095.1_14, VC0495, VC0496, VC0497, VC0498, VC0499, VC0501, VC0502, VC0503, VC0504, VC0505, VC0506, VC0508, VC0509, VC0510, VC0512	Var-4	DRR335615	Monir et al. mSpectrum 2022
BD_2007_DRR335700	MAB011	2007	BD-1	ctxB1	No data	Environmental	PLE_2	NC_002505.1_cds_WP_306461095.1_14, VC0495, VC0496, VC0497, VC0498, VC0499, VC0501, VC0502, VC0503, VC0504, VC0505, VC0506, VC0508, VC0509, VC0510, VC0512	Var-4	DRR335700	Monir et al. mSpectrum 2022
BD_2007_DRR335702	MAB013	2007	BD-1	ctxB1	No data	Clinical	PLE_2	NC_002505.1_cds_WP_306461095.1_14, VC0495, VC0496, VC0497, VC0498, VC0499, VC0501, VC0502, VC0503, VC0504, VC0505, VC0506, VC0508, VC0509, VC0510, VC0512	Var-4	DRR335702	Monir et al. mSpectrum 2022
BD_2007_DRR335612	BGD009	2007	BD-1	ctxB1	No data	Clinical	PLE_2	NC_002505.1_cds_WP_306461095.1_14, VC0495, VC0496, VC0497, VC0498, VC0499, VC0501, VC0502, VC0503, VC0504, VC0505, VC0506, VC0508, VC0509, VC0510, VC0512	Var-4	DRR335612	Monir et al. mSpectrum 2022
BD_2007_DRR335617	BGD014	2007	BD-1	ctxB1	No data	Clinical	PLE_2	NC_002505.1_cds_WP_306461095.1_14, VC0495, VC0496, VC0497, VC0498, VC0499, VC0501, VC0502, VC0503, VC0504, VC0505, VC0506, VC0508, VC0509, VC0510, VC0512	Var-4	DRR335617	Monir et al. mSpectrum 2022
BD_2007_DRR335613	BGD010	2007	BD-1	ctxB1	No data	Clinical	PLE(-)	VC0495, VC0496, VC0497, VC0498, VC0499	Var-2	DRR335613	Monir et al. mSpectrum 2022
BD_2007_DRR335616	BGD013	2007	BD-1	ctxB1	No data	Clinical	PLE_2	NC_002505.1_cds_WP_306461095.1_14, VC0495, VC0496, VC0497, VC0498, VC0499, VC0501, VC0502, VC0503, VC0504, VC0505, VC0506, VC0508, VC0509, VC0510, VC0512	Var-4	DRR335616	Monir et al. mSpectrum 2022
BD_2007_DRR335611	BGD008	2007	BD-1.1	ctxB7	No data	Clinical	PLE(-)	NC_002505.1_cds_WP_306461095.1_14, VC0495, VC0496, VC0497, VC0498, VC0499, VC0501, VC0502, VC0503, VC0504, VC0505, VC0506, VC0508, VC0509, VC0510, VC0512	Var-4	DRR335611	Monir et al. mSpectrum 2022
BD_2007_DRR335614	BGD011	2007	BD-1.1	ctxB7	No data	Clinical	PLE(-)	NC_002505.1_cds_WP_306461095.1_14, VC0495, VC0496, VC0497, VC0498, VC0499, VC0501, VC0502, VC0503, VC0504, VC0505, VC0506, VC0508, VC0509, VC0510, VC0512	Var-4	DRR335614	Monir et al. mSpectrum 2022
BD_2007_DRR335618	BGD015	2007	BD-1.1	ctxB7	No data	Clinical	PLE(-)	NC_002505.1_cds_WP_306461095.1_14, VC0495, VC0496, VC0497, VC0498, VC0499, VC0501, VC0502, VC0503, VC0504, VC0505, VC0506, VC0508, VC0509, VC0510, VC0512	Var-4	DRR335618	Monir et al. mSpectrum 2022
BD_2007_DRR335610	BGD007	2007	BD-1.1	ctxB7	No data	Clinical	PLE(-)	NC_002505.1_cds_WP_306461095.1_14, VC0495, VC0496, VC0497, VC0498, VC0499, VC0501, VC0502, VC0503, VC0504, VC0505, VC0506, VC0508, VC0509, VC0510, VC0512	Var-4	DRR335610	Monir et al. mSpectrum 2022
BD_2007_DRR335608	BGD005	2007	BD-2	ctxB1	No data	Clinical	PLE(-)	VC0495, VC0496, VC0497, VC0498, VC0499	Var-2	DRR335608	Monir et al. mSpectrum 2022
BD_2008_DRR335620	BGD018	2008	BD-1.1	ctxB7	No data	Clinical	PLE(-)	NC_002505.1_cds_WP_306461095.1_14, VC0495, VC0496, VC0497, VC0498, VC0499, VC0501, VC0502, VC0503, VC0504, VC0505, VC0506, VC0508, VC0509, VC0510, VC0512	Var-4	DRR335620	Monir et al. mSpectrum 2022
BD_2008_DRR335623	BGD021	2008	BD-1.1	ctxB7	No data	Clinical	PLE(-)	NC_002505.1_cds_WP_306461095.1_14, VC0495, VC0496, VC0497, VC0498, VC0499, VC0501, VC0502, VC0503, VC0504, VC0505, VC0506, VC0508, VC0509, VC0510, VC0512	Var-4	DRR335623	Monir et al. mSpectrum 2022
BD_2008_DRR335625	BGD023	2008	BD-1.1	ctxB7	No data	Clinical	PLE(-)	NC_002505.1_cds_WP_306461095.1_14, VC0495, VC0496, VC0497, VC0498, VC0499, VC0501, VC0502, VC0503, VC0504, VC0505, VC0506, VC0508, VC0509, VC0510, VC0512	Var-4	DRR335625	Monir et al. mSpectrum 2022
BD_2008_DRR335622	BGD020	2008	BD-1.1	ctxB7	No data	Clinical	PLE(-)	NC_002505.1_cds_WP_306461095.1_14, VC0495, VC0496, VC0497, VC0498, VC0499, VC0501, VC0502, VC0503, VC0504, VC0505, VC0506, VC0508, VC0509, VC0510, VC0512, VC0513	Var4*	DRR335622	Monir et al. mSpectrum 2022
BD_2008_DRR335626	BGD024	2008	BD-1.1	ctxB7	No data	Clinical	PLE(-)	NC_002505.1_cds_WP_306461095.1_14, VC0495, VC0496, VC0497, VC0498, VC0499, VC0501, VC0502, VC0503, VC0504, VC0505, VC0506, VC0508, VC0509, VC0510, VC0512	Var-4	DRR335626	Monir et al. mSpectrum 2022
BD_2008_DRR335621	BGD019	2008	BD-1.1	ctxB7	No data	Clinical	PLE(-)	NC_002505.1_cds_WP_306461095.1_14, VC0495, VC0496, VC0497, VC0498, VC0499, VC0501, VC0502, VC0503, VC0504, VC0505, VC0506, VC0508, VC0509, VC0510, VC0512	Var-4	DRR335621	Monir et al. mSpectrum 2022
BD_2008_DRR335624	BGD022	2008	BD-1.1	ctxB7	No data	Clinical	PLE(-)	NC_002505.1_cds_WP_306461095.1_14, VC0495, VC0496, VC0497, VC0498, VC0499, VC0501, VC0502, VC0503, VC0504, VC0505, VC0506, VC0508, VC0509, VC0510, VC0512	Var-4	DRR335624	Monir et al. mSpectrum 2022
BD_2008_DRR335619	BGD016	2008	BD-1.1	ctxB7	No data	Clinical	PLE(-)	NC_002505.1_cds_WP_306461095.1_14, VC0495, VC0496, VC0497, VC0498, VC0499, VC0501, VC0502, VC0503, VC0504, VC0505, VC0506, VC0508, VC0509, VC0510, VC0512	Var-4	DRR335619	Monir et al. mSpectrum 2022
BD_2008_DRR335627	BGD025	2008	BD-1.1	ctxB7	No data	Clinical	PLE(-)	NC_002505.1_cds_WP_306461095.1_14, VC0495, VC0496, VC0497, VC0498, VC0499, VC0501, VC0502, VC0503, VC0504, VC0505, VC0506, VC0508, VC0509, VC0510, VC0512	Var-4	DRR335627	Monir et al. mSpectrum 2022
BD_2008_DRR335704	MAB015	2008	BD-2	ctxB1	No data	Clinical	PLE(-)	VC0491, VC0495, VC0496, VC0497, VC0498, VC0499	Var6	DRR335704	Monir et al. mSpectrum 2022
BD_2008_DRR335703	MAB014	2008	BD-2	ctxB1	No data	Clinical	PLE_1	VC0491, VC0495, VC0496, VC0497, VC0498, VC0499	Var6	DRR335703	Monir et al. mSpectrum 2022
BD_2009_DRR189278	BGD107	2009	BD-1.1	ctxB7	No data	No data	PLE(-)	NC_002505.1_cds_WP_306461095.1_14, VC0495, VC0496, VC0497, VC0498, VC0499, VC0501, VC0502, VC0503, VC0504, VC0505, VC0506, VC0508, VC0509, VC0510, VC0512	Var-4	DRR189278	Monir et al. mSpectrum 2022
BD_2009_DRR335705	MAB017	2009	BD-2	ctxB1	No data	Clinical	PLE(-)	VC0495, VC0496, VC0497, VC0498, VC0499	Var-2	DRR335705	Monir et al. mSpectrum 2022
BD_2009_DRR189276	BGD104	2009	BD-2	ctxB1	No data	No data	PLE_1	VC0495, VC0496, VC0497, VC0498, VC0499	Var-2	DRR189276	Monir et al. mSpectrum 2022
BD_2009_DRR189277	BGD105	2009	BD-2	ctxB1	No data	No data	PLE_1	VC0495, VC0496, VC0497, VC0498, VC0499	Var-2	DRR189277	Monir et al. mSpectrum 2022
BD_2009_DRR335634	BGD035	2009	BD-2	ctxB1	No data	Clinical	PLE_1	VC0495, VC0496, VC0497, VC0498, VC0499, VC0502	Var2*	DRR335634	Monir et al. mSpectrum 2022
BD_2009_DRR335668	BGD108	2009	BD-2	ctxB1	No data	No data	PLE_1	VC0495, VC0496, VC0497, VC0498, VC0499	Var-2	DRR335668	Monir et al. mSpectrum 2022
BD_2009_DRR335631	BGD032	2009	BD-2	ctxB1	No data	Clinical	PLE_1	VC0495, VC0496, VC0497, VC0498, VC0499	Var-2	DRR335631	Monir et al. mSpectrum 2022
BD_2009_DRR335632	BGD033	2009	BD-2	ctxB1	No data	Clinical	PLE_1	VC0495, VC0496, VC0497, VC0498, VC0499	Var-2	DRR335632	Monir et al. mSpectrum 2022
BD_2009_DRR335628	BGD029	2009	BD-2	ctxB1	No data	Clinical	PLE_1	VC0495, VC0496, VC0497, VC0498, VC0499	Var-2	DRR335628	Monir et al. mSpectrum 2022
BD_2009_DRR189307	BGD026	2009	BD-2	ctxB1	No data	Clinical	PLE_1	VC0495, VC0496, VC0497, VC0498, VC0499	Var-2	DRR189307	Monir et al. mSpectrum 2022
BD_2009_DRR335629	BGD030	2009	BD-2	ctxB1	No data	Clinical	PLE_1	VC0495, VC0496, VC0497, VC0498, VC0499	Var-2	DRR335629	Monir et al. mSpectrum 2022
BD_2009_DRR335630	BGD031	2009	BD-2	ctxB1	No data	Clinical	PLE(-)	VC0495, VC0496, VC0497, VC0498, VC0499	Var-2	DRR335630	Monir et al. mSpectrum 2022
BD_2009_DRR189279	BGD109	2009	BD-2	ctxB1	No data	No data	PLE(-)	VC0495, VC0496, VC0497, VC0498, VC0499, VC0513	Var2*	DRR189279	Monir et al. mSpectrum 2022
BD_2009_DRR335633	BGD034	2009	BD-2	ctxB1	No data	Clinical	PLE(-)	VC0495, VC0496, VC0497, VC0498, VC0499	Var-2	DRR335633	Monir et al. mSpectrum 2022
BD_2009_DRR335667	BGD106	2009	BD-2	ctxB1	No data	No data	PLE_1	VC0495, VC0496, VC0497, VC0498, VC0499	Var-2	DRR335667	Monir et al. mSpectrum 2022
BD_2010_DRR335645	BGD048	2010	BD-1.1	ctxB7	No data	Clinical	PLE(-)	NC_002505.1_cds_WP_306461095.1_14, VC0495, VC0496, VC0497, VC0498, VC0499, VC0501, VC0502, VC0503, VC0504, VC0505, VC0506, VC0508, VC0509, VC0510, VC0512	Var-4	DRR335645	Monir et al. mSpectrum 2022
BD_2010_DRR189282	BGD113	2010	BD-1.1	ctxB7	No data	No data	PLE(-)	NC_002505.1_cds_WP_306461095.1_14, VC0495, VC0496, VC0497, VC0498, VC0499, VC0501, VC0502, VC0503, VC0504, VC0505, VC0506, VC0508, VC0509, VC0510, VC0512	Var-4	DRR189282	Monir et al. mSpectrum 2022
BD_2010_DRR335646	BGD049	2010	BD-1.1	ctxB7	No data	Clinical	PLE(-)	NC_002505.1_cds_WP_306461095.1_14, VC0495, VC0496, VC0497, VC0498, VC0499, VC0501, VC0502, VC0503, VC0504, VC0505, VC0506, VC0508, VC0509, VC0510, VC0512	Var-4	DRR335646	Monir et al. mSpectrum 2022
BD_2010_DRR335638	BGD040	2010	BD-1.1	ctxB7	No data	Clinical	PLE(-)	NC_002505.1_cds_WP_306461095.1_14, VC0495, VC0496, VC0497, VC0498, VC0499, VC0501, VC0502, VC0503, VC0504, VC0505, VC0506, VC0508, VC0509, VC0510, VC0512	Var-4	DRR335638	Monir et al. mSpectrum 2022
BD_2010_DRR335669	BGD112	2010	BD-1.1	ctxB7	No data	No data	PLE(-)	NC_002505.1_cds_WP_306461095.1_14, VC0495, VC0496, VC0497, VC0498, VC0499, VC0501, VC0502, VC0503, VC0504, VC0505, VC0506, VC0508, VC0509, VC0510, VC0512, VC0513	Var4*	DRR335669	Monir et al. mSpectrum 2022
BD_2010_DRR335708	MAB021	2010	BD-1.1	ctxB7	No data	Environmental	PLE(-)	NC_002505.1_cds_WP_306461095.1_14, VC0495, VC0496, VC0497, VC0498, VC0499, VC0501, VC0502, VC0503, VC0504, VC0505, VC0506, VC0508, VC0509, VC0510, VC0512	Var-4	DRR335708	Monir et al. mSpectrum 2022
BD_2010_DRR189280	BGD110	2010	BD-1.1	ctxB7	No data	No data	PLE(-)	NC_002505.1_cds_WP_306461095.1_14, VC0495, VC0496, VC0497, VC0498, VC0499, VC0501, VC0502, VC0503, VC0504, VC0505, VC0506, VC0508, VC0509, VC0510, VC0512, VC0513	Var4*	DRR189280	Monir et al. mSpectrum 2022
BD_2010_DRR335706	MAB018	2010	BD-1.1	ctxB7	No data	Environmental	PLE(-)	NC_002505.1_cds_WP_306461095.1_14, VC0495, VC0496, VC0497, VC0498, VC0499, VC0501, VC0502, VC0503, VC0504, VC0505, VC0506, VC0508, VC0509, VC0510, VC0512	Var-4	DRR335706	Monir et al. mSpectrum 2022
BD_2010_DRR335642	BGD045	2010	BD-1.1	ctxB7	No data	Clinical	PLE(-)	NC_002505.1_cds_WP_306461095.1_14, VC0495, VC0496, VC0497, VC0498, VC0499, VC0501, VC0502, VC0503, VC0504, VC0505, VC0506, VC0508, VC0509, VC0510, VC0512	Var-4	DRR335642	Monir et al. mSpectrum 2022
BD_2010_DRR335640	BGD042	2010	BD-1.1	ctxB7	No data	Clinical	PLE(-)	NC_002505.1_cds_WP_306461095.1_14, VC0495, VC0496, VC0497, VC0498, VC0499, VC0501, VC0502, VC0503, VC0504, VC0505, VC0506, VC0508, VC0509, VC0510, VC0512	Var-4	DRR335640	Monir et al. mSpectrum 2022
BD_2010_DRR189347	BGD043	2010	BD-1.1	ctxB7	No data	Clinical	PLE(-)	NC_002505.1_cds_WP_306461095.1_14, VC0495, VC0496, VC0497, VC0498, VC0499, VC0501, VC0502, VC0503, VC0504, VC0505, VC0506, VC0508, VC0509, VC0510, VC0512	Var-4	DRR189347	Monir et al. mSpectrum 2022
BD_2010_DRR335644	BGD047	2010	BD-1.1	ctxB7	No data	Clinical	PLE(-)	NC_002505.1_cds_WP_306461095.1_14, VC0495, VC0496, VC0497, VC0498, VC0499, VC0501, VC0502, VC0503, VC0504, VC0505, VC0506, VC0508, VC0509, VC0510, VC0512	Var-4	DRR335644	Monir et al. mSpectrum 2022
BD_2010_DRR335641	BGD044	2010	BD-1.1	ctxB7	No data	Clinical	PLE(-)	NC_002505.1_cds_WP_306461095.1_14, VC0495, VC0496, VC0497, VC0498, VC0499, VC0501, VC0502, VC0503, VC0504, VC0505, VC0506, VC0508, VC0509, VC0510, VC0512	Var-4	DRR335641	Monir et al. mSpectrum 2022
BD_2010_DRR335639	BGD041	2010	BD-1.1	ctxB7	No data	Clinical	PLE(-)	NC_002505.1_cds_WP_306461095.1_14, VC0495, VC0496, VC0497, VC0498, VC0499, VC0501, VC0502, VC0503, VC0504, VC0505, VC0506, VC0508, VC0509, VC0510, VC0512	Var-4	DRR335639	Monir et al. mSpectrum 2022
BD_2010_DRR189281	BGD111	2010	BD-1.1	ctxB7	No data	No data	PLE(-)	NC_002505.1_cds_WP_306461095.1_14, VC0495, VC0496, VC0497, VC0498, VC0499, VC0501, VC0502, VC0503, VC0504, VC0505, VC0506, VC0508, VC0509, VC0510, VC0512	Var-4	DRR189281	Monir et al. mSpectrum 2022
BD_2010_DRR335635	BGD037	2010	BD-1.1	ctxB7	No data	Clinical	PLE(-)	NC_002505.1_cds_WP_306461095.1_14, VC0495, VC0496, VC0497, VC0498, VC0499, VC0501, VC0502, VC0503, VC0504, VC0505, VC0506, VC0508, VC0509, VC0510, VC0512	Var-4	DRR335635	Monir et al. mSpectrum 2022
BD_2010_DRR335636	BGD038	2010	BD-1.1	ctxB7	No data	Clinical	PLE(-)	NC_002505.1_cds_WP_306461095.1_14, VC0495, VC0496, VC0497, VC0498, VC0499, VC0501, VC0502, VC0503, VC0504, VC0505, VC0506, VC0508, VC0509, VC0510, VC0512	Var-4	DRR335636	Monir et al. mSpectrum 2022
BD_2010_DRR335637	BGD039	2010	BD-1.1	ctxB7	No data	Clinical	PLE(-)	NC_002505.1_cds_WP_306461095.1_14, VC0495, VC0496, VC0497, VC0498, VC0499, VC0501, VC0502, VC0503, VC0504, VC0505, VC0506, VC0508, VC0509, VC0510, VC0512	Var-4	DRR335637	Monir et al. mSpectrum 2022
BD_2010_DRR335709	MAB022	2010	BD-2	ctxB1	No data	Clinical	PLE_1	VC0495, VC0496, VC0497, VC0498, VC0499	Var-2	DRR335709	Monir et al. mSpectrum 2022
BD_2010_DRR335643	BGD046	2010	BD-2	ctxB1	No data	Clinical	PLE_1	VC0495, VC0496, VC0497, VC0498, VC0499	Var-2	DRR335643	Monir et al. mSpectrum 2022
BD_2010_DRR189346	BGD036	2010	BD-2	ctxB1	No data	Clinical	PLE_1	VC0495, VC0496, VC0497, VC0498, VC0499	Var-2	DRR189346	Monir et al. mSpectrum 2022
BD_2011_DRR189313	BGD057	2011	BD-1.1	ctxB7	No data	Clinical	PLE(-)	NC_002505.1_cds_WP_306461095.1_14, VC0495, VC0496, VC0497, VC0498, VC0499, VC0501, VC0502, VC0503, VC0504, VC0505, VC0506, VC0508, VC0509, VC0510, VC0512	Var-4	DRR189313	Monir et al. mSpectrum 2022
BD_2011_DRR189283	BGD114	2011	BD-1.1	ctxB7	No data	No data	PLE(-)	NC_002505.1_cds_WP_306461095.1_14, VC0495, VC0496, VC0497, VC0498, VC0499, VC0501, VC0502, VC0503, VC0504, VC0505, VC0506, VC0508, VC0509, VC0510, VC0512	Var-4	DRR189283	Monir et al. mSpectrum 2022
BD_2011_DRR335670	BGD115	2011	BD-1.1	ctxB7	No data	No data	PLE(-)	NC_002505.1_cds_WP_306461095.1_14, VC0495, VC0496, VC0497, VC0498, VC0499, VC0501, VC0502, VC0503, VC0504, VC0505, VC0506, VC0508, VC0509, VC0510, VC0512	Var-4	DRR335670	Monir et al. mSpectrum 2022
BD_2011_DRR189284	BGD116	2011	BD-1.1	ctxB7	No data	No data	PLE(-)	NC_002505.1_cds_WP_306461095.1_14, VC0495, VC0496, VC0497, VC0498, VC0499, VC0501, VC0502, VC0503, VC0504, VC0505, VC0506, VC0508, VC0509, VC0510, VC0512, VC0513	Var4*	DRR189284	Monir et al. mSpectrum 2022
BD_2011_DRR189311	BGD056	2011	BD-1.1	ctxB7	No data	Clinical	PLE(-)	NC_002505.1_cds_WP_306461095.1_14, VC0495, VC0496, VC0497, VC0498, VC0499, VC0501, VC0502, VC0503, VC0504, VC0505, VC0506, VC0508, VC0509, VC0510, VC0512, VC0513	Var4*	DRR189311	Monir et al. mSpectrum 2022
BD_2011_DRR335648	BGD052	2011	BD-1.1	ctxB7	No data	Clinical	PLE(-)	NC_002505.1_cds_WP_306461095.1_14, VC0495, VC0496, VC0497, VC0498, VC0499, VC0501, VC0502, VC0503, VC0504, VC0505, VC0506, VC0508, VC0509, VC0510, VC0512	Var-4	DRR335648	Monir et al. mSpectrum 2022
BD_2011_DRR335647	BGD051	2011	BD-1.1	ctxB7	No data	Clinical	PLE(-)	NC_002505.1_cds_WP_306461095.1_14, VC0495, VC0496, VC0497, VC0498, VC0499, VC0501, VC0502, VC0503, VC0504, VC0505, VC0506, VC0508, VC0509, VC0510, VC0512	Var-4	DRR335647	Monir et al. mSpectrum 2022
BD_2011_DRR335649	BGD053	2011	BD-1.1	ctxB7	No data	Clinical	PLE(-)	NC_002505.1_cds_WP_306461095.1_14, VC0495, VC0496, VC0497, VC0498, VC0499, VC0501, VC0502, VC0503, VC0504, VC0505, VC0506, VC0508, VC0509, VC0510, VC0512	Var-4	DRR335649	Monir et al. mSpectrum 2022
BD_2011_DRR189310	BGD050	2011	BD-1.1	ctxB7	No data	Clinical	PLE(-)	NC_002505.1_cds_WP_306461095.1_14, VC0495, VC0496, VC0497, VC0498, VC0499, VC0501, VC0502, VC0503, VC0504, VC0505, VC0506, VC0508, VC0509, VC0510, VC0512	Var-4	DRR189310	Monir et al. mSpectrum 2022
BD_2011_DRR189314	BGD058	2011	BD-1.1	ctxB7	No data	Clinical	PLE(-)	NC_002505.1_cds_WP_306461095.1_14, VC0495, VC0496, VC0497, VC0498, VC0499, VC0501, VC0502, VC0503, VC0504, VC0505, VC0506, VC0508, VC0509, VC0510, VC0512	Var-4	DRR189314	Monir et al. mSpectrum 2022
BD_2011_DRR335716	MAB030	2011	BD-2	ctxB1	No data	Clinical	PLE(-)	VC0495, VC0496, VC0497, VC0498, VC0499	Var-2	DRR335716	Monir et al. mSpectrum 2022
BD_2011_DRR335713	MAB027	2011	BD-2	ctxB1	No data	Environmental	PLE_1	NC_002505.1_cds_WP_306461095.1_14, VC0490, VC0491, VC0492, VC0493, VC0494, VC0495, VC0496, VC0497, VC0498, VC0499, VC0501, VC0502, VC0503, VC0504, VC0505, VC0506, VC0508, VC0509, VC0510, VC0512, VC0513, VC0514, VC0515, VC0516	Var-5	DRR335713	Monir et al. mSpectrum 2022
BD_2011_DRR335711	MAB025	2011	BD-2	ctxB1	No data	Environmental	PLE_1	VC0495, VC0496, VC0497, VC0498, VC0499	Var-2	DRR335711	Monir et al. mSpectrum 2022
BD_2011_DRR335710	MAB023	2011	BD-2	ctxB1	No data	Environmental	PLE_1	VC0495, VC0496, VC0497, VC0498, VC0499	Var-2	DRR335710	Monir et al. mSpectrum 2022
BD_2011_DRR335714	MAB028	2011	BD-2	ctxB1	No data	Environmental	PLE_1	VC0495, VC0496, VC0497, VC0498, VC0499	Var-2	DRR335714	Monir et al. mSpectrum 2022
BD_2011_DRR335715	MAB029	2011	BD-2	ctxB1	No data	Clinical	PLE_1	VC0495, VC0496, VC0497, VC0498, VC0499	Var-2	DRR335715	Monir et al. mSpectrum 2022
BD_2011_DRR335712	MAB026	2011	BD-2	ctxB1	No data	Clinical	PLE_1	VC0495, VC0496, VC0497, VC0498, VC0499	Var-2	DRR335712	Monir et al. mSpectrum 2022
BD_2011_DRR189285	BGD117	2011	BD-2	ctxB1	No data	No data	PLE_1	VC0491, VC0495, VC0496, VC0497, VC0498, VC0499, VC0513	Var6*	DRR189285	Monir et al. mSpectrum 2022
BD_2012_DRR335653	BGD068	2012	BD-1.1	ctxB7	No data	Clinical	PLE(-)	NC_002505.1_cds_WP_306461095.1_14, VC0495, VC0496, VC0497, VC0498, VC0499, VC0501, VC0502, VC0503, VC0504, VC0505, VC0506, VC0508, VC0509, VC0510, VC0512	Var-4	DRR335653	Monir et al. mSpectrum 2022
BD_2012_DRR335650	BGD061	2012	BD-1.1	ctxB7	No data	Clinical	PLE(-)	NC_002505.1_cds_WP_306461095.1_14, VC0495, VC0496, VC0497, VC0498, VC0499, VC0501, VC0502, VC0503, VC0504, VC0505, VC0506, VC0508, VC0509, VC0510, VC0512	Var-4	DRR335650	Monir et al. mSpectrum 2022
BD_2012_DRR335651	BGD064	2012	BD-1.1	ctxB7	No data	Clinical	PLE(-)	NC_002505.1_cds_WP_306461095.1_14, VC0495, VC0496, VC0497, VC0498, VC0499, VC0501, VC0502, VC0503, VC0504, VC0505, VC0506, VC0508, VC0509, VC0510, VC0512	Var-4	DRR335651	Monir et al. mSpectrum 2022
BD_2012_DRR189309	BGD065	2012	BD-1.1	ctxB7	No data	Clinical	PLE(-)	NC_002505.1_cds_WP_306461095.1_14, VC0495, VC0496, VC0497, VC0498, VC0499, VC0501, VC0502, VC0503, VC0504, VC0505, VC0506, VC0508, VC0509, VC0510, VC0512	Var-4	DRR189309	Monir et al. mSpectrum 2022
BD_2012_DRR335652	BGD066	2012	BD-1.1	ctxB7	No data	Clinical	PLE(-)	NC_002505.1_cds_WP_306461095.1_14, VC0495, VC0496, VC0497, VC0498, VC0499, VC0501, VC0502, VC0503, VC0504, VC0505, VC0506, VC0508, VC0509, VC0510, VC0512	Var-4	DRR335652	Monir et al. mSpectrum 2022
BD_2012_DRR189308	BGD060	2012	BD-1.1	ctxB7	No data	Clinical	PLE(-)	NC_002505.1_cds_WP_306461095.1_14, VC0495, VC0496, VC0497, VC0498, VC0499, VC0501, VC0502, VC0503, VC0504, VC0505, VC0506, VC0508, VC0509, VC0510, VC0512	Var-4	DRR189308	Monir et al. mSpectrum 2022
BD_2012_DRR189312	BGD067	2012	BD-1.1	ctxB7	No data	Clinical	PLE(-)	NC_002505.1_cds_WP_306461095.1_14, VC0495, VC0496, VC0497, VC0498, VC0499, VC0501, VC0502, VC0503, VC0504, VC0505, VC0506, VC0508, VC0509, VC0510, VC0512	Var-4	DRR189312	Monir et al. mSpectrum 2022
BD_2012_DRR335722	MAB038	2012	BD-2	ctxB1	No data	Clinical	PLE_1	VC0495, VC0496, VC0497, VC0498, VC0499	Var-2	DRR335722	Monir et al. mSpectrum 2022
BD_2012_DRR335718	MAB033	2012	BD-2	ctxB1	No data	Environmental	PLE_1	VC0495, VC0496, VC0497, VC0498, VC0499	Var-2	DRR335718	Monir et al. mSpectrum 2022
BD_2012_DRR335717	MAB032	2012	BD-2	ctxB1	No data	Environmental	PLE_1	VC0495, VC0496, VC0497, VC0498, VC0499	Var-2	DRR335717	Monir et al. mSpectrum 2022
BD_2012_DRR335719	MAB034	2012	BD-2	ctxB1	No data	Environmental	PLE_1	VC0495, VC0496, VC0497, VC0498, VC0499	Var-2	DRR335719	Monir et al. mSpectrum 2022
BD_2012_DRR189286	BGD118	2012	BD-2	ctxB1	No data	No data	PLE(-)	VC0491, VC0495, VC0496, VC0497, VC0498, VC0499	Var6	DRR189286	Monir et al. mSpectrum 2022
BD_2012_DRR189287	BGD119	2012	BD-2	ctxB1	No data	No data	PLE(-)	VC0491, VC0495, VC0496, VC0497, VC0498, VC0499, VC0513	Var6*	DRR189287	Monir et al. mSpectrum 2022
BD_2012_DRR189289	BGD121	2012	BD-2	ctxB1	No data	No data	PLE(-)	VC0491, VC0495, VC0496, VC0497, VC0498, VC0499	Var6	DRR189289	Monir et al. mSpectrum 2022
BD_2012_DRR189288	BGD120	2012	BD-2	ctxB1	No data	No data	PLE(-)	VC0491, VC0495, VC0496, VC0497, VC0498, VC0499, VC0513	Var6*	DRR189288	Monir et al. mSpectrum 2022
BD_2013_DRR189317	BGD076	2013	BD-2	ctxB1	No data	Clinical	PLE_1	VC0495, VC0496, VC0497, VC0498, VC0499	Var-2	DRR189317	Monir et al. mSpectrum 2022
BD_2013_DRR335724	MAB040	2013	BD-2	ctxB1	No data	Environmental	PLE_1	VC0495, VC0496, VC0497, VC0498, VC0499	Var-2	DRR335724	Monir et al. mSpectrum 2022
BD_2013_DRR189326	BGD082	2013	BD-2	ctxB1	No data	Clinical	PLE_1	VC0495, VC0496, VC0497, VC0498, VC0499	Var-2	DRR189326	Monir et al. mSpectrum 2022
BD_2013_DRR189316	BGD072	2013	BD-2	ctxB1	No data	Clinical	PLE(-)	VC0495, VC0496, VC0497, VC0498, VC0499	Var-2	DRR189316	Monir et al. mSpectrum 2022
BD_2013_DRR189315	BGD070	2013	BD-2	ctxB1	No data	Clinical	PLE_1	VC0495, VC0496, VC0497, VC0498, VC0499	Var-2	DRR189315	Monir et al. mSpectrum 2022
BD_2013_DRR189320	BGD079	2013	BD-2	ctxB1	No data	Clinical	PLE_1	VC0495, VC0496, VC0497, VC0498, VC0499	Var-2	DRR189320	Monir et al. mSpectrum 2022
BD_2013_DRR335654	BGD071	2013	BD-2	ctxB1	No data	Clinical	PLE_1	VC0495, VC0496, VC0497, VC0498, VC0499	Var-2	DRR335654	Monir et al. mSpectrum 2022
BD_2013_DRR335655	BGD073	2013	BD-2	ctxB1	No data	Clinical	PLE_1	VC0495, VC0496, VC0497, VC0498, VC0499	Var-2	DRR335655	Monir et al. mSpectrum 2022
BD_2013_DRR335657	BGD075	2013	BD-2	ctxB1	No data	Clinical	PLE_1	VC0495, VC0496, VC0497, VC0498, VC0499	Var-2	DRR335657	Monir et al. mSpectrum 2022
BD_2013_DRR189318	BGD077	2013	BD-2	ctxB1	No data	Clinical	PLE_1	VC0495, VC0496, VC0497, VC0498, VC0499	Var-2	DRR189318	Monir et al. mSpectrum 2022
BD_2013_DRR335658	BGD078	2013	BD-2	ctxB1	No data	Clinical	PLE_1	VC0495, VC0496, VC0497, VC0498, VC0499	Var-2	DRR335658	Monir et al. mSpectrum 2022
BD_2013_DRR335659	BGD080	2013	BD-2	ctxB1	No data	Clinical	PLE_1	VC0495, VC0496, VC0497, VC0498, VC0499	Var-2	DRR335659	Monir et al. mSpectrum 2022
BD_2013_DRR189319	BGD084	2013	BD-2	ctxB1	No data	Clinical	PLE_1	VC0495, VC0496, VC0497, VC0498, VC0499	Var-2	DRR189319	Monir et al. mSpectrum 2022
BD_2013_DRR335661	BGD083	2013	BD-2	ctxB1	No data	Clinical	PLE_1	VC0495, VC0496, VC0497, VC0498, VC0499	Var-2	DRR335661	Monir et al. mSpectrum 2022
BD_2013_DRR335656	BGD074	2013	BD-2	ctxB1	No data	Clinical	PLE_1	VC0495, VC0496, VC0497, VC0498, VC0499	Var-2	DRR335656	Monir et al. mSpectrum 2022
BD_2013_DRR335660	BGD081	2013	BD-2	ctxB1	No data	Clinical	PLE_1	VC0491, VC0495, VC0496, VC0497, VC0498, VC0499	Var6	DRR335660	Monir et al. mSpectrum 2022
BD_2013_DRR189290	BGD122	2013	BD-2	ctxB1	No data	No data	PLE(-)	VC0491, VC0495, VC0496, VC0497, VC0498, VC0499	Var6	DRR189290	Monir et al. mSpectrum 2022
BD_2013_DRR335671	BGD123	2013	BD-2	ctxB1	No data	No data	PLE_1	VC0491, VC0492, VC0493, VC0494, VC0495, VC0496, VC0497, VC0498, VC0499, VC0501	Var-3	DRR335671	Monir et al. mSpectrum 2022
BD_2014_DRR335672	BGD125	2014	BD-1.1	ctxB7	No data	No data	PLE(-)	NC_002505.1_cds_WP_306461095.1_14, VC0495, VC0496, VC0497, VC0498, VC0499, VC0501, VC0502, VC0503, VC0504, VC0505, VC0506, VC0508, VC0509, VC0510, VC0512, VC0513	Var4*	DRR335672	Monir et al. mSpectrum 2022
BD_2014_DRR189328	BGD095	2014	BD-2	ctxB1	No data	Clinical	PLE_1	VC0491, VC0492, VC0493, VC0494, VC0495, VC0496, VC0497, VC0498, VC0499, VC0501	Var-3	DRR189328	Monir et al. mSpectrum 2022
BD_2014_DRR189329	BGD096	2014	BD-2	ctxB1	No data	Clinical	PLE_1	VC0491, VC0495, VC0496, VC0497, VC0498, VC0499	Var6	DRR189329	Monir et al. mSpectrum 2022
BD_2014_DRR335663	BGD090	2014	BD-2	ctxB1	No data	Clinical	PLE_1	VC0495, VC0496, VC0497, VC0498, VC0499	Var-2	DRR335663	Monir et al. mSpectrum 2022
BD_2014_DRR189321	BGD086	2014	BD-2	ctxB1	No data	Clinical	PLE_1	VC0495, VC0496, VC0497, VC0498, VC0499	Var-2	DRR189321	Monir et al. mSpectrum 2022
BD_2014_DRR189322	BGD087	2014	BD-2	ctxB1	No data	Clinical	PLE_1	VC0495, VC0496, VC0497, VC0498, VC0499	Var-2	DRR189322	Monir et al. mSpectrum 2022
BD_2014_DRR189324	BGD089	2014	BD-2	ctxB1	No data	Clinical	PLE_1	VC0495, VC0496, VC0497, VC0498, VC0499	Var-2	DRR189324	Monir et al. mSpectrum 2022
BD_2014_DRR189323	BGD088	2014	BD-2	ctxB1	No data	Clinical	PLE_1	VC0495, VC0496, VC0497, VC0498, VC0499	Var-2	DRR189323	Monir et al. mSpectrum 2022
BD_2014_DRR189325	BGD091	2014	BD-2	ctxB1	No data	Clinical	PLE_1	VC0495, VC0496, VC0497, VC0498, VC0499	Var-2	DRR189325	Monir et al. mSpectrum 2022
BD_2014_DRR189330	BGD098	2014	BD-2	ctxB1	No data	Clinical	PLE_1	VC0495, VC0496, VC0497, VC0498, VC0499	Var-2	DRR189330	Monir et al. mSpectrum 2022
BD_2014_DRR335666	BGD099	2014	BD-2	ctxB1	No data	Clinical	PLE_1	VC0495, VC0496, VC0497, VC0498, VC0499	Var-2	DRR335666	Monir et al. mSpectrum 2022
BD_2014_DRR335662	BGD085	2014	BD-2	ctxB1	No data	Clinical	PLE_1	VC0495, VC0496, VC0497, VC0498, VC0499	Var-2	DRR335662	Monir et al. mSpectrum 2022
BD_2014_DRR335725	MAB041	2014	BD-2	ctxB1	No data	Environmental	PLE_1	VC0495, VC0496, VC0497, VC0498, VC0499	Var-2	DRR335725	Monir et al. mSpectrum 2022
BD_2014_DRR335665	BGD097	2014	BD-2	ctxB1	No data	Clinical	PLE_1	VC0491, VC0495, VC0496, VC0497, VC0498, VC0499	Var6	DRR335665	Monir et al. mSpectrum 2022
BD_2014_DRR189327	BGD094	2014	BD-2	ctxB1	No data	Clinical	PLE_1	VC0491, VC0495, VC0496, VC0497, VC0498, VC0499	Var6	DRR189327	Monir et al. mSpectrum 2022
BD_2014_DRR335664	BGD093	2014	BD-2	ctxB1	No data	Clinical	PLE_1	VC0491, VC0495, VC0496, VC0497, VC0498, VC0499	Var6	DRR335664	Monir et al. mSpectrum 2022
BD_2014_DRR189291	BGD124	2014	BD-2	ctxB1	No data	No data	PLE_1	VC0491, VC0492, VC0493, VC0494, VC0495, VC0496, VC0497, VC0498, VC0499, VC0501	Var-3	DRR189291	Monir et al. mSpectrum 2022
BD_2015_DRR189292	BGD126	2015	BD-1.1	ctxB7	No data	No data	PLE(-)	NC_002505.1_cds_WP_306461095.1_14, VC0495, VC0496, VC0497, VC0498, VC0499, VC0501, VC0502, VC0503, VC0504, VC0505, VC0506, VC0508, VC0509, VC0510, VC0512	Var-4	DRR189292	Monir et al. mSpectrum 2022
BD_2015_DRR189293	BGD128	2015	BD-2	ctxB1	No data	No data	PLE_1	VC0495, VC0496, VC0497, VC0498, VC0499	Var-2	DRR189293	Monir et al. mSpectrum 2022
BD_2015_DRR189294	BGD130	2015	BD-2	ctxB1	No data	No data	PLE_1	VC0495, VC0496, VC0497, VC0498, VC0499	Var-2	DRR189294	Monir et al. mSpectrum 2022
BD_2015_DRR335674	BGD131	2015	BD-2	ctxB1	No data	No data	PLE_1	VC0495, VC0496, VC0497, VC0498, VC0499	Var-2	DRR335674	Monir et al. mSpectrum 2022
BD_2015_DRR335673	BGD127	2015	BD-2	ctxB1	No data	No data	PLE_1	VC0495, VC0496, VC0497, VC0498, VC0499	Var-2	DRR335673	Monir et al. mSpectrum 2022
BD_2015_DRR189296	BGD133	2015	BD-2	ctxB1	No data	No data	PLE(-)	VC0495, VC0496, VC0497, VC0498, VC0499	Var-2	DRR189296	Monir et al. mSpectrum 2022
BD_2015_DRR335675	BGD134	2015	BD-2	ctxB1	No data	No data	PLE_1	VC0495, VC0496, VC0497, VC0498, VC0499	Var-2	DRR335675	Monir et al. mSpectrum 2022
BD_2015_DRR189297	BGD136	2015	BD-2	ctxB1	No data	No data	PLE_1	VC0491, VC0492, VC0493, VC0494, VC0495, VC0496, VC0497, VC0498, VC0499, VC0501, VC0516	Var3*	DRR189297	Monir et al. mSpectrum 2022
BD_2015_DRR335676	BGD135	2015	BD-2	ctxB1	No data	No data	PLE_1	VC0491, VC0492, VC0493, VC0494, VC0495, VC0496, VC0497, VC0498, VC0499, VC0501	Var-3	DRR335676	Monir et al. mSpectrum 2022
BD_2016_DRR189298	BGD137	2016	BD-1.2	ctxB7	No data	No data	PLE(-)	NC_002505.1_cds_WP_306461095.1_14, VC0495, VC0496, VC0497, VC0498, VC0499, VC0501, VC0502, VC0503, VC0504, VC0505, VC0506, VC0508, VC0509, VC0510, VC0512	Var-4	DRR189298	Monir et al. mSpectrum 2022
BD_2016_DRR189299	BGD138	2016	BD-2	ctxB1	No data	No data	PLE_1	VC0491, VC0492, VC0493, VC0494, VC0495, VC0496, VC0497, VC0498, VC0499, VC0501	Var-3	DRR189299	Monir et al. mSpectrum 2022
BD_2016_DRR189300	BGD139	2016	BD-2	ctxB1	No data	No data	PLE_1	VC0491, VC0492, VC0493, VC0494, VC0495, VC0496, VC0497, VC0498, VC0499, VC0501	Var-3	DRR189300	Monir et al. mSpectrum 2022
BD_2016_DRR189301	BGD140	2016	BD-2	ctxB1	No data	No data	PLE_1	VC0491, VC0492, VC0493, VC0494, VC0495, VC0496, VC0497, VC0498, VC0499, VC0501	Var-3	DRR189301	Monir et al. mSpectrum 2022
BD_2016_DRR189305	BGD148	2016	BD-2	ctxB1	No data	No data	PLE_1	VC0491, VC0492, VC0493, VC0494, VC0495, VC0496, VC0497, VC0498, VC0499, VC0501	Var-3	DRR189305	Monir et al. mSpectrum 2022
BD_2016_DRR189303	BGD143	2016	BD-2	ctxB1	No data	No data	PLE_1	VC0491, VC0492, VC0493, VC0494, VC0495, VC0496, VC0497, VC0498, VC0499, VC0501	Var-3	DRR189303	Monir et al. mSpectrum 2022
BD_2016_DRR335678	BGD145	2016	BD-2	ctxB1	No data	No data	PLE_1	VC0491, VC0492, VC0493, VC0494, VC0495, VC0496, VC0497, VC0498, VC0499, VC0501	Var-3	DRR335678	Monir et al. mSpectrum 2022
BD_2016_DRR335677	BGD144	2016	BD-2	ctxB1	No data	No data	PLE_1	VC0491, VC0492, VC0493, VC0494, VC0495, VC0496, VC0497, VC0498, VC0499, VC0501	Var-3	DRR335677	Monir et al. mSpectrum 2022
BD_2016_DRR189306	BGD149	2016	BD-2	ctxB1	No data	No data	PLE_1	VC0491, VC0492, VC0493, VC0494, VC0495, VC0496, VC0497, VC0498, VC0499, VC0501	Var-3	DRR189306	Monir et al. mSpectrum 2022
BD_2016_DRR189302	BGD141	2016	BD-2	ctxB1	No data	No data	PLE_1	VC0491, VC0492, VC0493, VC0494, VC0495, VC0496, VC0497, VC0498, VC0499, VC0501	Var-3	DRR189302	Monir et al. mSpectrum 2022
BD_2016_DRR335679	BGD147	2016	BD-2	ctxB1	No data	No data	PLE_1	VC0491, VC0492, VC0493, VC0494, VC0495, VC0496, VC0497, VC0498, VC0499, VC0501	Var-3	DRR335679	Monir et al. mSpectrum 2022
BD_2016_DRR189304	BGD146	2016	BD-2	ctxB1	No data	No data	PLE_1	VC0491, VC0492, VC0493, VC0494, VC0495, VC0496, VC0497, VC0498, VC0499, VC0501, VC0513	Var3*	DRR189304	Monir et al. mSpectrum 2022
BD_2017_DRR335686	BGD156	2017	BD-2	ctxB1	No data	No data	PLE_1	VC0491, VC0492, VC0493, VC0494, VC0495, VC0496, VC0497, VC0498, VC0499, VC0501, VC0513	Var3*	DRR335686	Monir et al. mSpectrum 2022
BD_2017_DRR335681	BGD151	2017	BD-2	ctxB1	No data	No data	PLE_1	VC0491, VC0492, VC0493, VC0494, VC0495, VC0496, VC0497, VC0498, VC0499, VC0501	Var-3	DRR335681	Monir et al. mSpectrum 2022
BD_2017_DRR335683	BGD153	2017	BD-2	ctxB1	No data	No data	PLE_1	VC0491, VC0492, VC0493, VC0494, VC0495, VC0496, VC0497, VC0498, VC0499, VC0501	Var-3	DRR335683	Monir et al. mSpectrum 2022
BD_2017_DRR335689	BGD159	2017	BD-2	ctxB1	No data	No data	PLE_1	VC0491, VC0492, VC0493, VC0494, VC0495, VC0496, VC0497, VC0498, VC0499, VC0501	Var-3	DRR335689	Monir et al. mSpectrum 2022
BD_2017_DRR335688	BGD158	2017	BD-2	ctxB1	No data	No data	PLE_1	VC0491, VC0492, VC0493, VC0494, VC0495, VC0496, VC0497, VC0498, VC0499, VC0501	Var-3	DRR335688	Monir et al. mSpectrum 2022
BD_2017_DRR335680	BGD150	2017	BD-2	ctxB1	No data	No data	PLE_1	VC0491, VC0492, VC0493, VC0494, VC0495, VC0496, VC0497, VC0498, VC0499, VC0501	Var-3	DRR335680	Monir et al. mSpectrum 2022
BD_2017_DRR335685	BGD155	2017	BD-2	ctxB1	No data	No data	PLE_1	VC0491, VC0492, VC0493, VC0494, VC0495, VC0496, VC0497, VC0498, VC0499, VC0501	Var-3	DRR335685	Monir et al. mSpectrum 2022
BD_2017_DRR335682	BGD152	2017	BD-2	ctxB1	No data	No data	PLE(-)	VC0491, VC0492, VC0493, VC0494, VC0495, VC0496, VC0497, VC0498, VC0499, VC0501	Var-3	DRR335682	Monir et al. mSpectrum 2022
BD_2017_DRR335684	BGD154	2017	BD-2	ctxB1	No data	No data	PLE(-)	VC0491, VC0492, VC0493, VC0494, VC0495, VC0496, VC0497, VC0498, VC0499, VC0501, VC0513	Var3*	DRR335684	Monir et al. mSpectrum 2022
BD_2017_DRR335687	BGD157	2017	BD-2	ctxB1	No data	No data	PLE(-)	VC0491, VC0492, VC0493, VC0494, VC0495, VC0496, VC0497, VC0498, VC0499, VC0501	Var-3	DRR335687	Monir et al. mSpectrum 2022
BD_2018_SRR14297543	KDCP79	2018	BD-1.2	ctxB7	Ogawa	Clinical	PLE(-)	NC_002505.1_cds_WP_306461095.1_14, VC0495, VC0496, VC0497, VC0498, VC0499, VC0501, VC0502, VC0503, VC0504, VC0505, VC0506, VC0508, VC0509, VC0510, VC0512	Var-4	SRR14297543	Angermeyer et. al 2022, mBio
BD_2018_SRR14297678	KDCP152	2018	BD-1.2	ctxB7	Ogawa	Clinical	PLE(-)	NC_002505.1_cds_WP_306461095.1_14, VC0495, VC0496, VC0497, VC0498, VC0499, VC0501, VC0502, VC0503, VC0504, VC0505, VC0506, VC0508, VC0509, VC0510, VC0512	Var-4	SRR14297678	Angermeyer et. al 2022, mBio
BD_2018_SRR14297545	KDCP168	2018	BD-1.2	ctxB7	Ogawa	Clinical	PLE(-)	NC_002505.1_cds_WP_306461095.1_14, VC0495, VC0496, VC0497, VC0498, VC0499, VC0501, VC0502, VC0503, VC0504, VC0505, VC0506, VC0508, VC0509, VC0510, VC0512	Var-4	SRR14297545	Angermeyer et. al 2022, mBio
BD_2018_SRR14297663	KDCP82	2018	BD-1.2	ctxB7	Ogawa	Clinical	PLE(-)	NC_002505.1_cds_WP_306461095.1_14, VC0495, VC0496, VC0497, VC0498, VC0499, VC0501, VC0502, VC0503, VC0504, VC0505, VC0506, VC0508, VC0509, VC0510, VC0512	Var-4	SRR14297663	Angermeyer et. al 2022, mBio
BD_2018_SRR14297665	KDCP83	2018	BD-1.2	ctxB7	Ogawa	Clinical	PLE(-)	NC_002505.1_cds_WP_306461095.1_14, VC0495, VC0496, VC0497, VC0498, VC0499, VC0501, VC0502, VC0503, VC0504, VC0505, VC0506, VC0508, VC0509, VC0510, VC0512	Var-4	SRR14297665	Angermeyer et. al 2022, mBio
BD_2018_SRR14297666	KDCP87	2018	BD-1.2	ctxB7	Ogawa	Clinical	PLE(-)	NC_002505.1_cds_WP_306461095.1_14, VC0495, VC0496, VC0497, VC0498, VC0499, VC0501, VC0502, VC0503, VC0504, VC0505, VC0506, VC0508, VC0509, VC0510, VC0512	Var-4	SRR14297666	Angermeyer et. al 2022, mBio
BD_2018_SRR14297674	KDCP144	2018	BD-1.2	ctxB7	Ogawa	Clinical	PLE(-)	NC_002505.1_cds_WP_306461095.1_14, VC0495, VC0496, VC0497, VC0498, VC0499, VC0501, VC0502, VC0503, VC0504, VC0505, VC0506, VC0508, VC0509, VC0510, VC0512	Var-4	SRR14297674	Angermeyer et. al 2022, mBio
BD_2018_SRR14297670	KDCP136	2018	BD-1.2	ctxB7	Ogawa	Clinical	PLE(-)	NC_002505.1_cds_WP_306461095.1_14, VC0495, VC0496, VC0497, VC0498, VC0499, VC0501, VC0502, VC0503, VC0504, VC0505, VC0506, VC0508, VC0509, VC0510, VC0512	Var-4	SRR14297670	Angermeyer et. al 2022, mBio
BD_2018_SRR14297669	KDCP103	2018	BD-1.2	ctxB7	Ogawa	Clinical	PLE(-)	NC_002505.1_cds_WP_306461095.1_14, VC0495, VC0496, VC0497, VC0498, VC0499, VC0501, VC0502, VC0503, VC0504, VC0505, VC0506, VC0508, VC0509, VC0510, VC0512	Var-4	SRR14297669	Angermeyer et. al 2022, mBio
BD_2018_SRR14297679	KDCP154	2018	BD-1.2	ctxB7	Ogawa	Clinical	PLE(-)	NC_002505.1_cds_WP_306461095.1_14, VC0495, VC0496, VC0497, VC0498, VC0499, VC0501, VC0502, VC0503, VC0504, VC0505, VC0506, VC0508, VC0509, VC0510, VC0512	Var-4	SRR14297679	Angermeyer et. al 2022, mBio
BD_2018_SRR14297676	KDCP147	2018	BD-1.2	ctxB7	Ogawa	Clinical	PLE(-)	NC_002505.1_cds_WP_306461095.1_14, VC0495, VC0496, VC0497, VC0498, VC0499, VC0501, VC0502, VC0503, VC0504, VC0505, VC0506, VC0508, VC0509, VC0510, VC0512	Var-4	SRR14297676	Angermeyer et. al 2022, mBio
BD_2018_SRR14297671	KDCP137	2018	BD-1.2	ctxB7	Ogawa	Clinical	PLE(-)	NC_002505.1_cds_WP_306461095.1_14, VC0495, VC0496, VC0497, VC0498, VC0499, VC0501, VC0502, VC0503, VC0504, VC0505, VC0506, VC0508, VC0509, VC0510, VC0512	Var-4	SRR14297671	Angermeyer et. al 2022, mBio
BD_2018_SRR14297672	KDCP137	2018	BD-1.2	ctxB7	Ogawa	Clinical	PLE(-)	NC_002505.1_cds_WP_306461095.1_14, VC0495, VC0496, VC0497, VC0498, VC0499, VC0501, VC0502, VC0503, VC0504, VC0505, VC0506, VC0508, VC0509, VC0510, VC0512	Var-4	SRR14297672	Angermeyer et. al 2022, mBio
BD_2018_SRR14297668	KDCP98	2018	BD-1.2	ctxB7	Ogawa	Clinical	PLE(-)	NC_002505.1_cds_WP_306461095.1_14, VC0495, VC0496, VC0497, VC0498, VC0499, VC0501, VC0502, VC0503, VC0504, VC0505, VC0506, VC0508, VC0509, VC0510, VC0512	Var-4	SRR14297668	Angermeyer et. al 2022, mBio
BD_2018_SRR14297673	KDCP140	2018	BD-1.2	ctxB7	Ogawa	Clinical	PLE(-)	NC_002505.1_cds_WP_306461095.1_14, VC0495, VC0496, VC0497, VC0498, VC0499, VC0501, VC0502, VC0503, VC0504, VC0505, VC0506, VC0508, VC0509, VC0510, VC0512	Var-4	SRR14297673	Angermeyer et. al 2022, mBio
BD_2018_SRR14297662	KDCP69	2018	BD-2	ctxB1	Inaba	Clinical	PLE_1	VC0491, VC0492, VC0493, VC0494, VC0495, VC0496, VC0497, VC0498, VC0499, VC0501	Var-3	SRR14297662	Angermeyer et. al 2022, mBio
BD_2018_SRR14297544	KDCP81	2018	BD-2	ctxB1	Inaba	Clinical	PLE(-)	VC0491, VC0492, VC0493, VC0494, VC0495, VC0496, VC0497, VC0498, VC0499, VC0501	Var-3	SRR14297544	Angermeyer et. al 2022, mBio
BD_2018_SRR14297667	KDCP90	2018	BD-2	ctxB1	Inaba	Clinical	PLE(-)	VC0491, VC0492, VC0493, VC0494, VC0495, VC0496, VC0497, VC0498, VC0499, VC0501	Var-3	SRR14297667	Angermeyer et. al 2022, mBio
BD_2018_SRR14297542	KDCP74	2018	BD-2	ctxB1	Inaba	Clinical	PLE(-)	VC0491, VC0492, VC0493, VC0494, VC0495, VC0496, VC0497, VC0498, VC0499, VC0501	Var-3	SRR14297542	Angermeyer et. al 2022, mBio
BD_2018_SRR14297636	KDCP73	2018	BD-2	ctxB1	Inaba	Clinical	PLE(-)	VC0491, VC0492, VC0493, VC0494, VC0495, VC0496, VC0497, VC0498, VC0499, VC0501	Var-3	SRR14297636	Angermeyer et. al 2022, mBio
BD_2018_SRR14297661	KDCP68	2018	BD-2	ctxB1	Inaba	Clinical	PLE(-)	VC0491, VC0492, VC0493, VC0494, VC0495, VC0496, VC0497, VC0498, VC0499, VC0501, VC0512	Var3*	SRR14297661	Angermeyer et. al 2022, mBio
BD_2018_SRR14297660	KDCP68	2018	BD-2	ctxB1	Inaba	Clinical	PLE_1	VC0491, VC0492, VC0493, VC0494, VC0495, VC0496, VC0497, VC0498, VC0499, VC0501, VC0502	Var3*	SRR14297660	Angermeyer et. al 2022, mBio
BD_2018_SRR14297659	KDCP68	2018	BD-2	ctxB1	Inaba	Clinical	PLE(-)	VC0491, VC0492, VC0493, VC0494, VC0495, VC0496, VC0497, VC0498, VC0499, VC0501, VC0512	Var3*	SRR14297659	Angermeyer et. al 2022, mBio
BD_2018_SRR14297650	KDCP73	2018	BD-2	ctxB1	Inaba	Clinical	PLE(-)	VC0491, VC0492, VC0493, VC0494, VC0495, VC0496, VC0497, VC0498, VC0499, VC0501	Var-3	SRR14297650	Angermeyer et. al 2022, mBio
BD_2019_BFS813	BFS813	2019	BD-1.2a	ctxB7	No data	No data	PLE(-)	NC_002505.1_cds_WP_306461095.1_14, VC0495, VC0496, VC0497, VC0498, VC0499, VC0501, VC0502, VC0503, VC0504, VC0505, VC0506, VC0508, VC0509, VC0510, VC0512	Var-4	PRJNA1195958	Mathur et al. (unpublished)
BD_2019_SRR14297558	KDCP281	2019	BD-1.2a	ctxB7	Ogawa	Clinical	PLE(-)	NC_002505.1_cds_WP_306461095.1_14, VC0495, VC0496, VC0497, VC0498, VC0499, VC0501, VC0502, VC0503, VC0504, VC0505, VC0506, VC0508, VC0509, VC0510, VC0512	Var-4	SRR14297558	Angermeyer et. al 2022, mBio
BD_2019_SRR14297682	KDCP208	2019	BD-1.2a	ctxB7	Ogawa	Clinical	PLE(-)	NC_002505.1_cds_WP_306461095.1_14, VC0495, VC0496, VC0497, VC0498, VC0499, VC0501, VC0502, VC0503, VC0504, VC0505, VC0506, VC0508, VC0509, VC0510, VC0512	Var-4	SRR14297682	Angermeyer et. al 2022, mBio
BD_2019_SRR14297550	KDCP226	2019	BD-1.2a	ctxB7	Ogawa	Clinical	PLE(-)	NC_002505.1_cds_WP_306461095.1_14, VC0495, VC0496, VC0497, VC0498, VC0499, VC0501, VC0502, VC0503, VC0504, VC0505, VC0506, VC0508, VC0509, VC0510, VC0512	Var-4	SRR14297550	Angermeyer et. al 2022, mBio
BD_2019_SRR14297684	KDCP228	2019	BD-1.2a	ctxB7	Ogawa	Clinical	PLE(-)	NC_002505.1_cds_WP_306461095.1_14, VC0495, VC0496, VC0497, VC0498, VC0499, VC0501, VC0502, VC0503, VC0504, VC0505, VC0506, VC0508, VC0509, VC0510, VC0512	Var-4	SRR14297684	Angermeyer et. al 2022, mBio
BD_2019_SRR14297549	KDCP220	2019	BD-1.2a	ctxB7	Ogawa	Clinical	PLE(-)	NC_002505.1_cds_WP_306461095.1_14, VC0495, VC0496, VC0497, VC0498, VC0499, VC0501, VC0502, VC0503, VC0504, VC0505, VC0506, VC0508, VC0509, VC0510, VC0512	Var-4	SRR14297549	Angermeyer et. al 2022, mBio
BD_2019_SRR14297557	KDCP278	2019	BD-1.2a	ctxB7	Ogawa	Clinical	PLE(-)	NC_002505.1_cds_WP_306461095.1_14, VC0495, VC0496, VC0497, VC0498, VC0499, VC0501, VC0502, VC0503, VC0504, VC0505, VC0506, VC0508, VC0509, VC0510, VC0512	Var-4	SRR14297557	Angermeyer et. al 2022, mBio
BD_2019_SRR14297689	KDCP270	2019	BD-1.2a	ctxB7	Ogawa	Clinical	PLE(-)	NC_002505.1_cds_WP_306461095.1_14, VC0495, VC0496, VC0497, VC0498, VC0499, VC0501, VC0502, VC0503, VC0504, VC0505, VC0506, VC0508, VC0509, VC0510, VC0512	Var-4	SRR14297689	Angermeyer et. al 2022, mBio
BD_2019_SRR14297547	KDCP187	2019	BD-1.2a	ctxB7	Ogawa	Clinical	PLE(-)	NC_002505.1_cds_WP_306461095.1_14, VC0495, VC0496, VC0497, VC0498, VC0499, VC0501, VC0502, VC0503, VC0504, VC0505, VC0506, VC0508, VC0509, VC0510, VC0512	Var-4	SRR14297547	Angermeyer et. al 2022, mBio
BD_2019_BFS811	BFS811	2019	BD-1.2a	ctxB7	No data	No data	PLE(-)	NC_002505.1_cds_WP_306461095.1_14, VC0495, VC0496, VC0497, VC0498, VC0499, VC0501, VC0502, VC0503, VC0504, VC0505, VC0506, VC0508, VC0509, VC0510, VC0512	Var-4	PRJNA1195958	Mathur et al. (unpublished)
BD_2019_BFS809	BFS809	2019	BD-1.2a	ctxB7	No data	No data	PLE(-)	NC_002505.1_cds_WP_306461095.1_14, VC0495, VC0496, VC0497, VC0498, VC0499, VC0501, VC0502, VC0503, VC0504, VC0505, VC0506, VC0508, VC0509, VC0510, VC0512	Var-4	PRJNA1195958	Mathur et al. (unpublished)
BD_2019_BFS810	BFS810	2019	BD-1.2a	ctxB7	No data	No data	PLE(-)	NC_002505.1_cds_WP_306461095.1_14, VC0495, VC0496, VC0497, VC0498, VC0499, VC0501, VC0502, VC0503, VC0504, VC0505, VC0506, VC0508, VC0509, VC0510, VC0512	Var-4	PRJNA1195958	Mathur et al. (unpublished)
BD_2019_SRR14297681	KDCP202	2019	BD-1.2b	ctxB7	Ogawa	Clinical	PLE(-)	NC_002505.1_cds_WP_306461095.1_14, VC0495, VC0496, VC0497, VC0498, VC0499, VC0501, VC0502, VC0503, VC0504, VC0505, VC0506, VC0508, VC0509, VC0510, VC0512	Var-4	SRR14297681	Angermeyer et. al 2022, mBio
BD_2019_SRR14297554	KDCP262	2019	BD-1.2b	ctxB7	Ogawa	Clinical	PLE(-)	NC_002505.1_cds_WP_306461095.1_14, VC0495, VC0496, VC0497, VC0498, VC0499, VC0501, VC0502, VC0503, VC0504, VC0505, VC0506, VC0508, VC0509, VC0510, VC0512	Var-4	SRR14297554	Angermeyer et. al 2022, mBio
BD_2019_SRR14297687	KDCP260	2019	BD-1.2b	ctxB7	Ogawa	Clinical	PLE(-)	NC_002505.1_cds_WP_306461095.1_14, VC0495, VC0496, VC0497, VC0498, VC0499, VC0501, VC0502, VC0503, VC0504, VC0505, VC0506, VC0508, VC0509, VC0510, VC0512	Var-4	SRR14297687	Angermeyer et. al 2022, mBio
BD_2019_SRR14297686	KDCP254	2019	BD-1.2b	ctxB7	Ogawa	Clinical	PLE(-)	NC_002505.1_cds_WP_306461095.1_14, VC0495, VC0496, VC0497, VC0498, VC0499, VC0501, VC0502, VC0503, VC0504, VC0505, VC0506, VC0508, VC0509, VC0510, VC0512	Var-4	SRR14297686	Angermeyer et. al 2022, mBio
BD_2019_SRR14297553	KDCP245	2019	BD-1.2b	ctxB7	Ogawa	Clinical	PLE(-)	NC_002505.1_cds_WP_306461095.1_14, VC0495, VC0496, VC0497, VC0498, VC0499, VC0501, VC0502, VC0503, VC0504, VC0505, VC0506, VC0508, VC0509, VC0510, VC0512	Var-4	SRR14297553	Angermeyer et. al 2022, mBio
BD_2019_SRR14297555	KDCP262	2019	BD-1.2b	ctxB7	Ogawa	Clinical	PLE(-)	NC_002505.1_cds_WP_306461095.1_14, VC0495, VC0496, VC0497, VC0498, VC0499, VC0501, VC0502, VC0503, VC0504, VC0505, VC0506, VC0508, VC0509, VC0510, VC0512	Var-4	SRR14297555	Angermeyer et. al 2022, mBio
BD_2019_BFS812	BFS812	2019	BD-1.2b	ctxB7	No data	No data	PLE(-)	NC_002505.1_cds_WP_306461095.1_14, VC0495, VC0496, VC0497, VC0498, VC0499, VC0501, VC0502, VC0503, VC0504, VC0505, VC0506, VC0508, VC0509, VC0510, VC0512	Var-4	PRJNA1195958	Mathur et al. 2025, bioRxiv
BD_2019_SRR14297556	KDCP264	2019	BD-1.2b	ctxB7	Ogawa	Clinical	PLE(-)	NC_002505.1_cds_WP_306461095.1_14, VC0495, VC0496, VC0497, VC0498, VC0499, VC0501, VC0502, VC0503, VC0504, VC0505, VC0506, VC0508, VC0509, VC0510, VC0512	Var-4	SRR14297556	Angermeyer et. al 2022, mBio
BD_2019_SRR14297685	KDCP250	2019	BD-1.2b	ctxB7	Ogawa	Clinical	PLE(-)	NC_002505.1_cds_WP_306461095.1_14, VC0495, VC0496, VC0497, VC0498, VC0499, VC0501, VC0502, VC0503, VC0504, VC0505, VC0506, VC0508, VC0509, VC0510, VC0512	Var-4	SRR14297685	Angermeyer et. al 2022, mBio
BD_2019_SRR14297546	KDCP183	2019	BD-2	ctxB1	Inaba	Clinical	PLE_1	VC0491, VC0492, VC0493, VC0494, VC0495, VC0496, VC0497, VC0498, VC0501	Var3*	SRR14297546	Angermeyer et. al 2022, mBio
BD_2020_BFS815	BFS815	2020	BD-1.2a	ctxB7	No data	No data	PLE(-)	NC_002505.1_cds_WP_306461095.1_14, VC0495, VC0496, VC0497, VC0498, VC0499, VC0501, VC0502, VC0503, VC0504, VC0505, VC0506, VC0508, VC0509, VC0510, VC0512	Var-4	PRJNA1195958	Mathur et al. 2025, bioRxiv
BD_2020_BFS858	BFS858	2020	BD-1.2a	ctxB7	No data	No data	PLE(-)	NC_002505.1_cds_WP_306461095.1_14, VC0495, VC0496, VC0497, VC0498, VC0499, VC0501, VC0502, VC0503, VC0504, VC0505, VC0506, VC0508, VC0509, VC0510, VC0512	Var-4	PRJNA1195958	Mathur et al. 2025, bioRxiv
BD_2020_BFS814	BFS814	2020	BD-1.2a	ctxB7	No data	No data	PLE(-)	NC_002505.1_cds_WP_306461095.1_14, VC0495, VC0496, VC0497, VC0498, VC0499, VC0501, VC0502, VC0503, VC0504, VC0505, VC0506, VC0508, VC0509, VC0510, VC0512	Var-4	PRJNA1195958	Mathur et al. 2025, bioRxiv
BD_2020_BFS859	BFS859	2020	BD-1.2a	ctxB7	No data	No data	PLE(-)	NC_002505.1_cds_WP_306461095.1_14, VC0495, VC0496, VC0497, VC0498, VC0499, VC0501, VC0502, VC0503, VC0504, VC0505, VC0506, VC0508, VC0509, VC0510, VC0512	Var-4	PRJNA1195958	Mathur et al. 2025, bioRxiv
BD_2020_BFS816	BFS816	2020	BD-1.2a	ctxB7	No data	No data	PLE(-)	NC_002505.1_cds_WP_306461095.1_14, VC0495, VC0496, VC0497, VC0498, VC0499, VC0501, VC0502, VC0503, VC0504, VC0505, VC0506, VC0508, VC0509, VC0510, VC0512	Var-4	PRJNA1195958	Mathur et al. 2025, bioRxiv
BD_2020_BFS886	BFS886	2020	BD-1.2a	ctxB7	No data	No data	PLE(-)	NC_002505.1_cds_WP_306461095.1_14, VC0495, VC0496, VC0497, VC0498, VC0499, VC0501, VC0502, VC0503, VC0504, VC0505, VC0506, VC0508, VC0509, VC0510, VC0512	Var-4	PRJNA1195958	Mathur et al. 2025, bioRxiv
BD_2020_BFS860	BFS860	2020	BD-1.2a	ctxB7	No data	No data	PLE(-)	NC_002505.1_cds_WP_306461095.1_14, VC0495, VC0496, VC0497, VC0498, VC0499, VC0501, VC0502, VC0503, VC0504, VC0505, VC0506, VC0508, VC0509, VC0510, VC0512	Var-4	PRJNA1195958	Mathur et al. 2025, bioRxiv
BD_2020_BFS888	BFS888	2020	BD-1.2a	ctxB7	No data	No data	PLE(-)	NC_002505.1_cds_WP_306461095.1_14, VC0495, VC0496, VC0497, VC0498, VC0499, VC0501, VC0502, VC0503, VC0504, VC0505, VC0506, VC0508, VC0509, VC0510, VC0512	Var-4	PRJNA1195958	Mathur et al. 2025, bioRxiv
BD_2020_BFS851	BFS851	2020	BD-1.2a	ctxB7	No data	No data	PLE(-)	NC_002505.1_cds_WP_306461095.1_14, VC0495, VC0496, VC0497, VC0498, VC0499, VC0501, VC0502, VC0503, VC0504, VC0505, VC0506, VC0508, VC0509, VC0510, VC0512	Var-4	PRJNA1195958	Mathur et al. 2025, bioRxiv
BD_2020_BFS890	BFS890	2020	BD-1.2a	ctxB7	No data	No data	PLE(-)	NC_002505.1_cds_WP_306461095.1_14, VC0495, VC0496, VC0497, VC0498, VC0499, VC0501, VC0502, VC0503, VC0504, VC0505, VC0506, VC0508, VC0509, VC0510, VC0512	Var-4	PRJNA1195958	Mathur et al. 2025, bioRxiv
BD_2020_BFS819	BFS819	2020	BD-1.2a	ctxB7	No data	No data	PLE(-)	NC_002505.1_cds_WP_306461095.1_14, VC0495, VC0496, VC0497, VC0498, VC0499, VC0501, VC0502, VC0503, VC0504, VC0505, VC0506, VC0508, VC0509, VC0510, VC0512	Var-4	PRJNA1195958	Mathur et al. 2025, bioRxiv
BD_2020_BFS864	BFS864	2020	BD-1.2a	ctxB7	No data	No data	PLE(-)	NC_002505.1_cds_WP_306461095.1_14, VC0495, VC0496, VC0497, VC0498, VC0499, VC0501, VC0502, VC0503, VC0504, VC0505, VC0506, VC0508, VC0509, VC0510, VC0512	Var-4	PRJNA1195958	Mathur et al. 2025, bioRxiv
BD_2020_BFS863	BFS863	2020	BD-1.2a	ctxB7	No data	No data	PLE(-)	NC_002505.1_cds_WP_306461095.1_14, VC0495, VC0496, VC0497, VC0498, VC0499, VC0501, VC0502, VC0503, VC0504, VC0505, VC0506, VC0508, VC0509, VC0510, VC0512	Var-4	PRJNA1195958	Mathur et al. 2025, bioRxiv
BD_2020_BFS852	BFS852	2020	BD-1.2a	ctxB7	No data	No data	PLE(-)	NC_002505.1_cds_WP_306461095.1_14, VC0495, VC0496, VC0497, VC0498, VC0499, VC0501, VC0502, VC0503, VC0504, VC0505, VC0506, VC0508, VC0509, VC0510, VC0512	Var-4	PRJNA1195958	Mathur et al. 2025, bioRxiv
BD_2020_BFS833	BFS833	2020	BD-1.2a	ctxB7	No data	No data	PLE(-)	NC_002505.1_cds_WP_306461095.1_14, VC0495, VC0496, VC0497, VC0498, VC0499, VC0501, VC0502, VC0503, VC0504, VC0505, VC0506, VC0508, VC0509, VC0510, VC0512	Var-4	PRJNA1195958	Mathur et al. 2025, bioRxiv
BD_2020_BFS817	BFS817	2020	BD-1.2a	ctxB7	No data	No data	PLE(-)	NC_002505.1_cds_WP_306461095.1_14, VC0495, VC0496, VC0497, VC0498, VC0499, VC0501, VC0502, VC0503, VC0504, VC0505, VC0506, VC0508, VC0509, VC0510, VC0512	Var-4	PRJNA1195958	Mathur et al. 2025, bioRxiv
BD_2020_BFS892	BFS892	2020	BD-1.2a	ctxB7	No data	No data	PLE(-)	NC_002505.1_cds_WP_306461095.1_14, VC0495, VC0496, VC0497, VC0498, VC0499, VC0501, VC0502, VC0503, VC0504, VC0505, VC0506, VC0508, VC0509, VC0510, VC0512	Var-4	PRJNA1195958	Mathur et al. 2025, bioRxiv
BD_2020_BFS838	BFS838	2020	BD-1.2a	ctxB7	No data	No data	PLE(-)	NC_002505.1_cds_WP_306461095.1_14, VC0495, VC0496, VC0497, VC0498, VC0499, VC0501, VC0502, VC0503, VC0504, VC0505, VC0506, VC0508, VC0509, VC0510, VC0512	Var-4	PRJNA1195958	Mathur et al. 2025, bioRxiv
BD_2020_BFS831	BFS831	2020	BD-1.2a	ctxB7	No data	No data	PLE(-)	NC_002505.1_cds_WP_306461095.1_14, VC0495, VC0496, VC0497, VC0498, VC0499, VC0501, VC0502, VC0503, VC0504, VC0505, VC0506, VC0508, VC0509, VC0510, VC0512	Var-4	PRJNA1195958	Mathur et al. 2025, bioRxiv
BD_2020_BFS837	BFS837	2020	BD-1.2a	ctxB7	No data	No data	PLE(-)	NC_002505.1_cds_WP_306461095.1_14, VC0495, VC0496, VC0497, VC0498, VC0499, VC0501, VC0502, VC0503, VC0504, VC0505, VC0506, VC0508, VC0509, VC0510, VC0512	Var-4	PRJNA1195958	Mathur et al. 2025, bioRxiv
BD_2020_BFS832	BFS832	2020	BD-1.2a	ctxB7	No data	No data	PLE(-)	NC_002505.1_cds_WP_306461095.1_14, VC0495, VC0496, VC0497, VC0498, VC0499, VC0501, VC0502, VC0503, VC0504, VC0505, VC0506, VC0508, VC0509, VC0510, VC0512	Var-4	PRJNA1195958	Mathur et al. 2025, bioRxiv
BD_2020_BFS862	BFS862	2020	BD-1.2a	ctxB7	No data	No data	PLE(-)	NC_002505.1_cds_WP_306461095.1_14, VC0495, VC0496, VC0497, VC0498, VC0499, VC0501, VC0502, VC0503, VC0504, VC0505, VC0506, VC0508, VC0509, VC0510, VC0512	Var-4	PRJNA1195958	Mathur et al. 2025, bioRxiv
BD_2020_BFS829	BFS829	2020	BD-1.2a	ctxB7	No data	No data	PLE(-)	NC_002505.1_cds_WP_306461095.1_14, VC0495, VC0496, VC0497, VC0498, VC0499, VC0501, VC0502, VC0503, VC0504, VC0505, VC0506, VC0508, VC0509, VC0510, VC0512	Var-4	PRJNA1195958	Mathur et al. 2025, bioRxiv
BD_2020_BFS902	BFS902	2020	BD-1.2a	ctxB7	No data	No data	PLE(-)	NC_002505.1_cds_WP_306461095.1_14, VC0495, VC0496, VC0497, VC0498, VC0499, VC0501, VC0502, VC0503, VC0504, VC0505, VC0506, VC0508, VC0509, VC0510, VC0512	Var-4	PRJNA1195958	Mathur et al. 2025, bioRxiv
BD_2020_BFS823	BFS823	2020	BD-1.2a	ctxB7	No data	No data	PLE(-)	NC_002505.1_cds_WP_306461095.1_14, VC0495, VC0496, VC0497, VC0498, VC0499, VC0501, VC0502, VC0503, VC0504, VC0505, VC0506, VC0508, VC0509, VC0510, VC0512	Var-4	PRJNA1195958	Mathur et al. 2025, bioRxiv
BD_2020_BFS827	BFS827	2020	BD-1.2a	ctxB7	No data	No data	PLE(-)	NC_002505.1_cds_WP_306461095.1_14, VC0495, VC0496, VC0497, VC0498, VC0499, VC0501, VC0502, VC0503, VC0504, VC0505, VC0506, VC0508, VC0509, VC0510, VC0512	Var-4	PRJNA1195958	Mathur et al. 2025, bioRxiv
BD_2020_BFS835	BFS835	2020	BD-1.2a	ctxB7	No data	No data	PLE(-)	NC_002505.1_cds_WP_306461095.1_14, VC0495, VC0496, VC0497, VC0498, VC0499, VC0501, VC0502, VC0503, VC0504, VC0505, VC0506, VC0508, VC0509, VC0510, VC0512	Var-4	PRJNA1195958	Mathur et al. 2025, bioRxiv
BD_2020_BFS887	BFS887	2020	BD-1.2a	ctxB7	No data	No data	PLE(-)	NC_002505.1_cds_WP_306461095.1_14, VC0495, VC0496, VC0497, VC0498, VC0499, VC0501, VC0502, VC0503, VC0504, VC0505, VC0506, VC0508, VC0509, VC0510, VC0512	Var-4	PRJNA1195958	Mathur et al. 2025, bioRxiv
BD_2020_BFS821	BFS821	2020	BD-1.2a	ctxB7	No data	No data	PLE(-)	NC_002505.1_cds_WP_306461095.1_14, VC0495, VC0496, VC0497, VC0498, VC0499, VC0501, VC0502, VC0503, VC0504, VC0505, VC0506, VC0508, VC0509, VC0510, VC0512	Var-4	PRJNA1195958	Mathur et al. 2025, bioRxiv
BD_2020_BFS828	BFS828	2020	BD-1.2a	ctxB7	No data	No data	PLE(-)	NC_002505.1_cds_WP_306461095.1_14, VC0495, VC0496, VC0497, VC0498, VC0499, VC0501, VC0502, VC0503, VC0504, VC0505, VC0506, VC0508, VC0509, VC0510, VC0512	Var-4	PRJNA1195958	Mathur et al. 2025, bioRxiv
BD_2020_BFS825	BFS825	2020	BD-1.2a	ctxB7	No data	No data	PLE(-)	NC_002505.1_cds_WP_306461095.1_14, VC0495, VC0496, VC0497, VC0498, VC0499, VC0501, VC0502, VC0503, VC0504, VC0505, VC0506, VC0508, VC0509, VC0510, VC0512	Var-4	PRJNA1195958	Mathur et al. 2025, bioRxiv
BD_2020_BFS824	BFS824	2020	BD-1.2a	ctxB7	No data	No data	PLE(-)	NC_002505.1_cds_WP_306461095.1_14, VC0495, VC0496, VC0497, VC0498, VC0499, VC0501, VC0502, VC0503, VC0504, VC0505, VC0506, VC0508, VC0509, VC0510, VC0512	Var-4	PRJNA1195958	Mathur et al. 2025, bioRxiv
BD_2020_BFS820	BFS820	2020	BD-1.2a	ctxB7	No data	No data	PLE(-)	NC_002505.1_cds_WP_306461095.1_14, VC0495, VC0496, VC0497, VC0498, VC0499, VC0501, VC0502, VC0503, VC0504, VC0505, VC0506, VC0508, VC0509, VC0510, VC0512	Var-4	PRJNA1195958	Mathur et al. 2025, bioRxiv
BD_2020_BFS839	BFS839	2020	BD-1.2a	ctxB7	No data	No data	PLE(-)	NC_002505.1_cds_WP_306461095.1_14, VC0495, VC0496, VC0497, VC0498, VC0499, VC0501, VC0502, VC0503, VC0504, VC0505, VC0506, VC0508, VC0509, VC0510, VC0512	Var-4	PRJNA1195958	Mathur et al. 2025, bioRxiv
BD_2020_BFS861	BFS861	2020	BD-1.2a	ctxB7	No data	No data	PLE(-)	NC_002505.1_cds_WP_306461095.1_14, VC0495, VC0496, VC0497, VC0498, VC0499, VC0501, VC0502, VC0503, VC0504, VC0505, VC0506, VC0508, VC0509, VC0510, VC0512	Var-4	PRJNA1195958	Mathur et al. 2025, bioRxiv
BD_2020_BFS818	BFS818	2020	BD-1.2a	ctxB7	No data	No data	PLE(-)	NC_002505.1_cds_WP_306461095.1_14, VC0495, VC0496, VC0497, VC0498, VC0499, VC0501, VC0502, VC0503, VC0504, VC0505, VC0506, VC0508, VC0509, VC0510, VC0512	Var-4	PRJNA1195958	Mathur et al. 2025, bioRxiv
BD_2020_BFS898	BFS898	2020	BD-1.2a	ctxB7	No data	No data	PLE(-)	NC_002505.1_cds_WP_306461095.1_14, VC0495, VC0496, VC0497, VC0498, VC0499, VC0501, VC0502, VC0503, VC0504, VC0505, VC0506, VC0508, VC0509, VC0510, VC0512	Var-4	PRJNA1195958	Mathur et al. 2025, bioRxiv
BD_2020_BFS901	BFS901	2020	BD-1.2b	ctxB7	No data	No data	PLE(-)	NC_002505.1_cds_WP_306461095.1_14, VC0495, VC0496, VC0497, VC0498, VC0499, VC0501, VC0502, VC0503, VC0504, VC0505, VC0506, VC0508, VC0509, VC0510, VC0512	Var-4	PRJNA1195958	Mathur et al. 2025, bioRxiv
BD_2020_BFS834	BFS834	2020	BD-1.2b	ctxB7	No data	No data	PLE(-)	NC_002505.1_cds_WP_306461095.1_14, VC0495, VC0496, VC0497, VC0498, VC0499, VC0501, VC0502, VC0503, VC0504, VC0505, VC0506, VC0508, VC0509, VC0510, VC0512	Var-4	PRJNA1195958	Mathur et al. 2025, bioRxiv
BD_2020_BFS836	BFS836	2020	BD-1.2b	ctxB7	No data	No data	PLE(-)	NC_002505.1_cds_WP_306461095.1_14, VC0495, VC0496, VC0497, VC0498, VC0499, VC0501, VC0502, VC0503, VC0504, VC0505, VC0506, VC0508, VC0509, VC0510, VC0512	Var-4	PRJNA1195958	Mathur et al. 2025, bioRxiv
BD_2020_BFS830	BFS830	2020	BD-1.2b	ctxB7	No data	No data	PLE(-)	NC_002505.1_cds_WP_306461095.1_14, VC0495, VC0496, VC0497, VC0498, VC0499, VC0501, VC0502, VC0503, VC0504, VC0505, VC0506, VC0508, VC0509, VC0510, VC0512	Var-4	PRJNA1195958	Mathur et al. 2025, bioRxiv
BD_2020_BFS826	BFS826	2020	BD-1.2b	ctxB7	No data	No data	PLE(-)	NC_002505.1_cds_WP_306461095.1_14, VC0495, VC0496, VC0497, VC0498, VC0499, VC0501, VC0502, VC0503, VC0504, VC0505, VC0506, VC0508, VC0509, VC0510, VC0512	Var-4	PRJNA1195958	Mathur et al. 2025, bioRxiv
BD_2020_BFS889	BFS889	2020	BD-1.2b	ctxB7	No data	No data	PLE(-)	NC_002505.1_cds_WP_306461095.1_14, VC0495, VC0496, VC0497, VC0498, VC0499, VC0501, VC0502, VC0503, VC0504, VC0505, VC0506, VC0508, VC0509, VC0510, VC0512	Var-4	PRJNA1195958	Mathur et al. 2025, bioRxiv
BD_2021_BFS870	BFS870	2021	BD-1.2	ctxB7	No data	No data	PLE(-)	NC_002505.1_cds_WP_306461095.1_14, VC0495, VC0496, VC0497, VC0498, VC0499, VC0501, VC0502, VC0503, VC0504, VC0505, VC0506, VC0508, VC0509, VC0510, VC0512	Var-4	PRJNA1195958	Mathur et al. 2025, bioRxiv
BD_2021_BFS1030	BFS1030	2021	BD-1.2a	ctxB7	No data	No data	PLE(-)	NC_002505.1_cds_WP_306461095.1_14, VC0495, VC0496, VC0497, VC0498, VC0499, VC0501, VC0502, VC0503, VC0504, VC0505, VC0506, VC0508, VC0509, VC0510, VC0512	Var-4	PRJNA1195958	Mathur et al. 2025, bioRxiv
BD_2021_BFS855	BFS855	2021	BD-1.2a	ctxB7	No data	No data	PLE(-)	NC_002505.1_cds_WP_306461095.1_14, VC0495, VC0496, VC0497, VC0498, VC0499, VC0501, VC0502, VC0503, VC0504, VC0505, VC0506, VC0508, VC0509, VC0510, VC0512	Var-4	PRJNA1195958	Mathur et al. 2025, bioRxiv
BD_2021_BFS938	BFS938	2021	BD-1.2a	ctxB7	No data	No data	PLE(-)	NC_002505.1_cds_WP_306461095.1_14, VC0495, VC0496, VC0497, VC0498, VC0499, VC0501, VC0502, VC0503, VC0504, VC0505, VC0506, VC0508, VC0509, VC0510, VC0512	Var-4	PRJNA1195958	Mathur et al. 2025, bioRxiv
BD_2021_BFS787	BFS787	2021	BD-1.2a	ctxB7	No data	No data	PLE(-)	NC_002505.1_cds_WP_306461095.1_14, VC0495, VC0496, VC0497, VC0498, VC0499, VC0501, VC0502, VC0503, VC0504, VC0505, VC0506, VC0508, VC0509, VC0510, VC0512	Var-4	PRJNA1195958	Mathur et al. 2025, bioRxiv
BD_2021_BFS793	BFS793	2021	BD-1.2a	ctxB7	No data	No data	PLE(-)	NC_002505.1_cds_WP_306461095.1_14, VC0495, VC0496, VC0497, VC0498, VC0499, VC0501, VC0502, VC0503, VC0504, VC0505, VC0506, VC0508, VC0509, VC0510, VC0512	Var-4	PRJNA1195958	Mathur et al. 2025, bioRxiv
BD_2021_BFS877	BFS877	2021	BD-1.2a	ctxB7	No data	No data	PLE(-)	NC_002505.1_cds_WP_306461095.1_14, VC0495, VC0496, VC0497, VC0498, VC0499, VC0501, VC0502, VC0503, VC0504, VC0505, VC0506, VC0508, VC0509, VC0510, VC0512	Var-4	PRJNA1195958	Mathur et al. 2025, bioRxiv
BD_2021_BFS842	BFS842	2021	BD-1.2a	ctxB7	No data	No data	PLE(-)	NC_002505.1_cds_WP_306461095.1_14, VC0495, VC0496, VC0497, VC0498, VC0499, VC0501, VC0502, VC0503, VC0504, VC0505, VC0506, VC0508, VC0509, VC0510, VC0512	Var-4	PRJNA1195958	Mathur et al. 2025, bioRxiv
BD_2021_BFS840	BFS840	2021	BD-1.2a	ctxB7	No data	No data	PLE(-)	NC_002505.1_cds_WP_306461095.1_14, VC0495, VC0496, VC0497, VC0498, VC0499, VC0501, VC0502, VC0503, VC0504, VC0505, VC0506, VC0508, VC0509, VC0510, VC0512	Var-4	PRJNA1195958	Mathur et al. 2025, bioRxiv
BD_2021_BFS803	BFS803	2021	BD-1.2a	ctxB7	No data	No data	PLE(-)	NC_002505.1_cds_WP_306461095.1_14, VC0495, VC0496, VC0497, VC0498, VC0499, VC0501, VC0502, VC0503, VC0504, VC0505, VC0506, VC0508, VC0509, VC0510, VC0512	Var-4	PRJNA1195958	Mathur et al. 2025, bioRxiv
BD_2021_BFS800	BFS800	2021	BD-1.2a	ctxB7	No data	No data	PLE(-)	NC_002505.1_cds_WP_306461095.1_14, VC0495, VC0496, VC0497, VC0498, VC0499, VC0501, VC0502, VC0503, VC0504, VC0505, VC0506, VC0508, VC0509, VC0510, VC0512	Var-4	PRJNA1195958	Mathur et al. 2025, bioRxiv
BD_2021_BFS783	BFS783	2021	BD-1.2a	ctxB7	No data	No data	PLE_11	NC_002505.1_cds_WP_306461095.1_14, VC0495, VC0496, VC0497, VC0498, VC0499, VC0501, VC0502, VC0503, VC0504, VC0505, VC0506, VC0508, VC0509, VC0510, VC0512	Var-4	PRJNA1195958	Mathur et al. 2025, bioRxiv
BD_2021_BFS948	BFS948	2021	BD-1.2a	ctxB7	No data	No data	PLE(-)	NC_002505.1_cds_WP_306461095.1_14, VC0495, VC0496, VC0497, VC0498, VC0499, VC0501, VC0502, VC0503, VC0504, VC0505, VC0506, VC0508, VC0509, VC0510, VC0512	Var-4	PRJNA1195958	Mathur et al. 2025, bioRxiv
BD_2021_BFS796	BFS796	2021	BD-1.2a	ctxB7	No data	No data	PLE(-)	NC_002505.1_cds_WP_306461095.1_14, VC0495, VC0496, VC0497, VC0498, VC0499, VC0501, VC0502, VC0503, VC0504, VC0505, VC0506, VC0508, VC0509, VC0510, VC0512	Var-4	PRJNA1195958	Mathur et al. 2025, bioRxiv
BD_2021_BFS790	BFS790	2021	BD-1.2a	ctxB7	No data	No data	PLE(-)	NC_002505.1_cds_WP_306461095.1_14, VC0495, VC0496, VC0497, VC0498, VC0499, VC0501, VC0502, VC0503, VC0504, VC0505, VC0506, VC0508, VC0509, VC0510, VC0512	Var-4	PRJNA1195958	Mathur et al. 2025, bioRxiv
BD_2021_BFS785	BFS785	2021	BD-1.2a	ctxB7	No data	No data	PLE(-)	NC_002505.1_cds_WP_306461095.1_14, VC0495, VC0496, VC0497, VC0498, VC0499, VC0501, VC0502, VC0503, VC0504, VC0505, VC0506, VC0508, VC0509, VC0510, VC0512	Var-4	PRJNA1195958	Mathur et al. 2025, bioRxiv
BD_2021_BFS849	BFS849	2021	BD-1.2a	ctxB7	No data	No data	PLE(-)	NC_002505.1_cds_WP_306461095.1_14, VC0495, VC0496, VC0497, VC0498, VC0499, VC0501, VC0502, VC0503, VC0504, VC0505, VC0506, VC0508, VC0509, VC0510, VC0512	Var-4	PRJNA1195958	Mathur et al. 2025, bioRxiv
BD_2021_BFS867	BFS867	2021	BD-1.2a	ctxB7	No data	No data	PLE(-)	NC_002505.1_cds_WP_306461095.1_14, VC0495, VC0496, VC0497, VC0498, VC0499, VC0501, VC0502, VC0503, VC0504, VC0505, VC0506, VC0508, VC0509, VC0510, VC0512	Var-4	PRJNA1195958	Mathur et al. 2025, bioRxiv
BD_2021_BFS880	BFS880	2021	BD-1.2a	ctxB7	No data	No data	PLE(-)	NC_002505.1_cds_WP_306461095.1_14, VC0495, VC0496, VC0497, VC0498, VC0499, VC0501, VC0502, VC0503, VC0504, VC0505, VC0506, VC0508, VC0509, VC0510, VC0512	Var-4	PRJNA1195958	Mathur et al. 2025, bioRxiv
BD_2021_BFS795	BFS795	2021	BD-1.2a	ctxB7	No data	No data	PLE(-)	NC_002505.1_cds_WP_306461095.1_14, VC0495, VC0496, VC0497, VC0498, VC0499, VC0501, VC0502, VC0503, VC0504, VC0505, VC0506, VC0508, VC0509, VC0510, VC0512	Var-4	PRJNA1195958	Mathur et al. 2025, bioRxiv
BD_2021_BFS854	BFS854	2021	BD-1.2a	ctxB7	No data	No data	PLE(-)	NC_002505.1_cds_WP_306461095.1_14, VC0495, VC0496, VC0497, VC0498, VC0499, VC0501, VC0502, VC0503, VC0504, VC0505, VC0506, VC0508, VC0509, VC0510, VC0512	Var-4	PRJNA1195958	Mathur et al. 2025, bioRxiv
BD_2021_BFS808	BFS808	2021	BD-1.2a	ctxB7	No data	No data	PLE(-)	NC_002505.1_cds_WP_306461095.1_14, VC0495, VC0496, VC0497, VC0498, VC0499, VC0501, VC0502, VC0503, VC0504, VC0505, VC0506, VC0508, VC0509, VC0510, VC0512	Var-4	PRJNA1195958	Mathur et al. 2025, bioRxiv
BD_2021_BFS1031	BFS1031	2021	BD-1.2a	ctxB7	No data	No data	PLE_11	NC_002505.1_cds_WP_306461095.1_14, VC0495, VC0496, VC0497, VC0498, VC0499, VC0501, VC0502, VC0503, VC0504, VC0505, VC0506, VC0508, VC0509, VC0510, VC0512	Var-4	PRJNA1195958	Mathur et al. 2025, bioRxiv
BD_2021_BFS1032	BFS1032	2021	BD-1.2a	ctxB7	No data	No data	PLE_11	NC_002505.1_cds_WP_306461095.1_14, VC0495, VC0496, VC0497, VC0498, VC0499, VC0501, VC0502, VC0503, VC0504, VC0505, VC0506, VC0508, VC0509, VC0510, VC0512	Var-4	PRJNA1195958	Mathur et al. 2025, bioRxiv
BD_2021_BFS781	BFS781	2021	BD-1.2a	ctxB7	No data	No data	PLE_11	NC_002505.1_cds_WP_306461095.1_14, VC0495, VC0496, VC0497, VC0498, VC0499, VC0501, VC0502, VC0503, VC0504, VC0505, VC0506, VC0508, VC0509, VC0510, VC0512	Var-4	PRJNA1195958	Mathur et al. 2025, bioRxiv
BD_2021_BFS782	BFS782	2021	BD-1.2a	ctxB7	No data	No data	PLE_11	NC_002505.1_cds_WP_306461095.1_14, VC0495, VC0496, VC0497, VC0498, VC0499, VC0501, VC0502, VC0503, VC0504, VC0505, VC0506, VC0508, VC0509, VC0510, VC0512	Var-4	PRJNA1195958	Mathur et al. 2025, bioRxiv
BD_2021_BFS780	BFS780	2021	BD-1.2a	ctxB7	No data	No data	PLE_11	NC_002505.1_cds_WP_306461095.1_14, VC0495, VC0496, VC0497, VC0498, VC0499, VC0501, VC0502, VC0503, VC0504, VC0505, VC0506, VC0508, VC0509, VC0510, VC0512	Var-4	PRJNA1195958	Mathur et al. 2025, bioRxiv
BD_2021_BFS794	BFS794	2021	BD-1.2a	ctxB7	No data	No data	PLE(-)	NC_002505.1_cds_WP_306461095.1_14, VC0495, VC0496, VC0497, VC0498, VC0499, VC0501, VC0502, VC0503, VC0504, VC0505, VC0506, VC0508, VC0509, VC0510, VC0512	Var-4	PRJNA1195958	Mathur et al. 2025, bioRxiv
BD_2021_BFS847	BFS847	2021	BD-1.2a	ctxB7	No data	No data	PLE_11	NC_002505.1_cds_WP_306461095.1_14, VC0495, VC0496, VC0497, VC0498, VC0499, VC0501, VC0502, VC0503, VC0504, VC0505, VC0506, VC0508, VC0509, VC0510, VC0512	Var-4	PRJNA1195958	Mathur et al. 2025, bioRxiv
BD_2021_BFS857	BFS857	2021	BD-1.2a	ctxB7	No data	No data	PLE_11	NC_002505.1_cds_WP_306461095.1_14, VC0495, VC0496, VC0497, VC0498, VC0499, VC0501, VC0502, VC0503, VC0504, VC0505, VC0506, VC0508, VC0509, VC0510, VC0512	Var-4	PRJNA1195958	Mathur et al. 2025, bioRxiv
BD_2021_BFS779	BFS779	2021	BD-1.2a	ctxB7	No data	No data	PLE_11	NC_002505.1_cds_WP_306461095.1_14, VC0495, VC0496, VC0497, VC0498, VC0499, VC0501, VC0502, VC0503, VC0504, VC0505, VC0506, VC0508, VC0509, VC0510, VC0512	Var-4	PRJNA1195958	Mathur et al. 2025, bioRxiv
BD_2021_BFS846	BFS846	2021	BD-1.2a	ctxB7	No data	No data	PLE_11	NC_002505.1_cds_WP_306461095.1_14, VC0495, VC0496, VC0497, VC0498, VC0499, VC0501, VC0502, VC0503, VC0504, VC0505, VC0506, VC0508, VC0509, VC0510, VC0512	Var-4	PRJNA1195958	Mathur et al. 2025, bioRxiv
BD_2021_BFS853	BFS853	2021	BD-1.2a	ctxB7	No data	No data	PLE(-)	NC_002505.1_cds_WP_306461095.1_14, VC0495, VC0496, VC0497, VC0498, VC0499, VC0501, VC0502, VC0503, VC0504, VC0505, VC0506, VC0508, VC0509, VC0510, VC0512	Var-4	PRJNA1195958	Mathur et al. 2025, bioRxiv
BD_2021_BFS791	BFS791	2021	BD-1.2a	ctxB7	No data	No data	PLE(-)	NC_002505.1_cds_WP_306461095.1_14, VC0495, VC0496, VC0497, VC0498, VC0499, VC0501, VC0502, VC0503, VC0504, VC0505, VC0506, VC0508, VC0509, VC0510, VC0512	Var-4	PRJNA1195958	Mathur et al. 2025, bioRxiv
BD_2021_BFS869	BFS869	2021	BD-1.2a	ctxB7	No data	No data	PLE(-)	NC_002505.1_cds_WP_306461095.1_14, VC0495, VC0496, VC0497, VC0498, VC0499, VC0501, VC0502, VC0503, VC0504, VC0505, VC0506, VC0508, VC0509, VC0510, VC0512	Var-4	PRJNA1195958	Mathur et al. 2025, bioRxiv
BD_2021_BFS881	BFS881	2021	BD-1.2a	ctxB7	No data	No data	PLE(-)	NC_002505.1_cds_WP_306461095.1_14, VC0495, VC0496, VC0497, VC0498, VC0499, VC0501, VC0502, VC0503, VC0504, VC0505, VC0506, VC0508, VC0509, VC0510, VC0512	Var-4	PRJNA1195958	Mathur et al. 2025, bioRxiv
BD_2021_BFS798	BFS798	2021	BD-1.2a	ctxB7	No data	No data	PLE(-)	NC_002505.1_cds_WP_306461095.1_14, VC0495, VC0496, VC0497, VC0498, VC0499, VC0501, VC0502, VC0503, VC0504, VC0505, VC0506, VC0508, VC0509, VC0510, VC0512	Var-4	PRJNA1195958	Mathur et al. 2025, bioRxiv
BD_2021_BFS805	BFS805	2021	BD-1.2a	ctxB7	No data	No data	PLE(-)	NC_002505.1_cds_WP_306461095.1_14, VC0495, VC0496, VC0497, VC0498, VC0499, VC0501, VC0502, VC0503, VC0504, VC0505, VC0506, VC0508, VC0509, VC0510, VC0512	Var-4	PRJNA1195958	Mathur et al. 2025, bioRxiv
BD_2021_BFS797	BFS797	2021	BD-1.2a	ctxB7	No data	No data	PLE(-)	NC_002505.1_cds_WP_306461095.1_14, VC0495, VC0496, VC0497, VC0498, VC0499, VC0501, VC0502, VC0503, VC0504, VC0505, VC0506, VC0508, VC0509, VC0510, VC0512	Var-4	PRJNA1195958	Mathur et al. 2025, bioRxiv
BD_2021_BFS845	BFS845	2021	BD-1.2a	ctxB7	No data	No data	PLE(-)	NC_002505.1_cds_WP_306461095.1_14, VC0495, VC0496, VC0497, VC0498, VC0499, VC0501, VC0502, VC0503, VC0504, VC0505, VC0506, VC0508, VC0509, VC0510, VC0512	Var-4	PRJNA1195958	Mathur et al. 2025, bioRxiv
BD_2021_BFS883	BFS883	2021	BD-1.2a	ctxB7	No data	No data	PLE(-)	NC_002505.1_cds_WP_306461095.1_14, VC0495, VC0496, VC0497, VC0498, VC0499, VC0501, VC0502, VC0503, VC0504, VC0505, VC0506, VC0508, VC0509, VC0510, VC0512	Var-4	PRJNA1195958	Mathur et al. 2025, bioRxiv
BD_2021_BFS806	BFS806	2021	BD-1.2a	ctxB7	No data	No data	PLE(-)	NC_002505.1_cds_WP_306461095.1_14, VC0495, VC0496, VC0497, VC0498, VC0499, VC0501, VC0502, VC0503, VC0504, VC0505, VC0506, VC0508, VC0509, VC0510, VC0512	Var-4	PRJNA1195958	Mathur et al. 2025, bioRxiv
BD_2021_BFS872	BFS872	2021	BD-1.2a	ctxB7	No data	No data	PLE(-)	NC_002505.1_cds_WP_306461095.1_14, VC0495, VC0496, VC0497, VC0498, VC0499, VC0501, VC0502, VC0503, VC0504, VC0505, VC0506, VC0508, VC0509, VC0510, VC0512	Var-4	PRJNA1195958	Mathur et al. 2025, bioRxiv
BD_2021_BFS807	BFS807	2021	BD-1.2a	ctxB7	No data	No data	PLE(-)	NC_002505.1_cds_WP_306461095.1_14, VC0495, VC0496, VC0497, VC0498, VC0499, VC0501, VC0502, VC0503, VC0504, VC0505, VC0506, VC0508, VC0509, VC0510, VC0512	Var-4	PRJNA1195958	Mathur et al. 2025, bioRxiv
BD_2021_BFS848	BFS848	2021	BD-1.2a	ctxB7	No data	No data	PLE(-)	NC_002505.1_cds_WP_306461095.1_14, VC0495, VC0496, VC0497, VC0498, VC0499, VC0501, VC0502, VC0503, VC0504, VC0505, VC0506, VC0508, VC0509, VC0510, VC0512	Var-4	PRJNA1195958	Mathur et al. 2025, bioRxiv
BD_2021_BFS868	BFS868	2021	BD-1.2a	ctxB7	No data	No data	PLE(-)	NC_002505.1_cds_WP_306461095.1_14, VC0495, VC0496, VC0497, VC0498, VC0499, VC0501, VC0502, VC0503, VC0504, VC0505, VC0506, VC0508, VC0509, VC0510, VC0512	Var-4	PRJNA1195958	Mathur et al. 2025, bioRxiv
BD_2021_BFS799	BFS799	2021	BD-1.2a	ctxB7	No data	No data	PLE(-)	NC_002505.1_cds_WP_306461095.1_14, VC0495, VC0496, VC0497, VC0498, VC0499, VC0501, VC0502, VC0503, VC0504, VC0505, VC0506, VC0508, VC0509, VC0510, VC0512	Var-4	PRJNA1195958	Mathur et al. 2025, bioRxiv
BD_2021_BFS873	BFS873	2021	BD-1.2a	ctxB7	No data	No data	PLE(-)	NC_002505.1_cds_WP_306461095.1_14, VC0495, VC0496, VC0497, VC0498, VC0499, VC0501, VC0502, VC0503, VC0504, VC0505, VC0506, VC0508, VC0509, VC0510, VC0512	Var-4	PRJNA1195958	Mathur et al. 2025, bioRxiv
BD_2021_BFS850	BFS850	2021	BD-1.2a	ctxB7	No data	No data	PLE(-)	NC_002505.1_cds_WP_306461095.1_14, VC0495, VC0496, VC0497, VC0498, VC0499, VC0501, VC0502, VC0503, VC0504, VC0505, VC0506, VC0508, VC0509, VC0510, VC0512	Var-4	PRJNA1195958	Mathur et al. 2025, bioRxiv
BD_2021_BFS904	BFS904	2021	BD-1.2a	ctxB7	No data	No data	PLE(-)	NC_002505.1_cds_WP_306461095.1_14, VC0495, VC0496, VC0497, VC0498, VC0499, VC0501, VC0502, VC0503, VC0504, VC0505, VC0506, VC0508, VC0509, VC0510, VC0512	Var-4	PRJNA1195958	Mathur et al. 2025, bioRxiv
BD_2021_BFS856	BFS856	2021	BD-1.2a	ctxB7	No data	No data	PLE(-)	NC_002505.1_cds_WP_306461095.1_14, VC0495, VC0496, VC0497, VC0498, VC0499, VC0501, VC0502, VC0503, VC0504, VC0505, VC0506, VC0508, VC0509, VC0510, VC0512	Var-4	PRJNA1195958	Mathur et al. 2025, bioRxiv
BD_2021_BFS802	BFS802	2021	BD-1.2a	ctxB7	No data	No data	PLE(-)	NC_002505.1_cds_WP_306461095.1_14, VC0495, VC0496, VC0497, VC0498, VC0499, VC0501, VC0502, VC0503, VC0504, VC0505, VC0506, VC0508, VC0509, VC0510, VC0512	Var-4	PRJNA1195958	Mathur et al. 2025, bioRxiv
BD_2021_BFS784	BFS784	2021	BD-1.2a	ctxB7	No data	No data	PLE(-)	NC_002505.1_cds_WP_306461095.1_14, VC0495, VC0496, VC0497, VC0498, VC0499, VC0501, VC0502, VC0503, VC0504, VC0505, VC0506, VC0508, VC0509, VC0510, VC0512	Var-4	PRJNA1195958	Mathur et al. 2025, bioRxiv
BD_2021_BFS788	BFS788	2021	BD-1.2a	ctxB7	No data	No data	PLE(-)	NC_002505.1_cds_WP_306461095.1_14, VC0495, VC0496, VC0497, VC0498, VC0499, VC0501, VC0502, VC0503, VC0504, VC0505, VC0506, VC0508, VC0509, VC0510, VC0512	Var-4	PRJNA1195958	Mathur et al. 2025, bioRxiv
BD_2021_BFS801	BFS801	2021	BD-1.2a	ctxB7	No data	No data	PLE(-)	NC_002505.1_cds_WP_306461095.1_14, VC0495, VC0496, VC0497, VC0498, VC0499, VC0501, VC0502, VC0503, VC0504, VC0505, VC0506, VC0508, VC0509, VC0510, VC0512	Var-4	PRJNA1195958	Mathur et al. 2025, bioRxiv
BD_2021_BFS885	BFS885	2021	BD-1.2a	ctxB7	No data	No data	PLE(-)	NC_002505.1_cds_WP_306461095.1_14, VC0495, VC0496, VC0497, VC0498, VC0499, VC0501, VC0502, VC0503, VC0504, VC0505, VC0506, VC0508, VC0509, VC0510, VC0512	Var-4	PRJNA1195958	Mathur et al. 2025, bioRxiv
BD_2021_BFS841	BFS841	2021	BD-1.2a	ctxB7	No data	No data	PLE(-)	NC_002505.1_cds_WP_306461095.1_14, VC0495, VC0496, VC0497, VC0498, VC0499, VC0501, VC0502, VC0503, VC0504, VC0505, VC0506, VC0508, VC0509, VC0510, VC0512	Var-4	PRJNA1195958	Mathur et al. 2025, bioRxiv
BD_2021_BFS866	BFS866	2021	BD-1.2a	ctxB7	No data	No data	PLE(-)	NC_002505.1_cds_WP_306461095.1_14, VC0495, VC0496, VC0497, VC0498, VC0499, VC0501, VC0502, VC0503, VC0504, VC0505, VC0506, VC0508, VC0509, VC0510, VC0512	Var-4	PRJNA1195958	Mathur et al. 2025, bioRxiv
BD_2021_BFS804	BFS804	2021	BD-1.2a	ctxB7	No data	No data	PLE(-)	NC_002505.1_cds_WP_306461095.1_14, VC0495, VC0496, VC0497, VC0498, VC0499, VC0501, VC0502, VC0503, VC0504, VC0505, VC0506, VC0508, VC0509, VC0510, VC0512	Var-4	PRJNA1195958	Mathur et al. 2025, bioRxiv
BD_2021_BFS947	BFS947	2021	BD-1.2a	ctxB7	No data	No data	PLE(-)	NC_002505.1_cds_WP_306461095.1_14, VC0495, VC0496, VC0497, VC0498, VC0499, VC0501, VC0502, VC0503, VC0504, VC0505, VC0506, VC0508, VC0509, VC0510, VC0512	Var-4	PRJNA1195958	Mathur et al. 2025, bioRxiv
BD_2021_BFS843	BFS843	2021	BD-1.2a	ctxB7	No data	No data	PLE(-)	NC_002505.1_cds_WP_306461095.1_14, VC0495, VC0496, VC0497, VC0498, VC0499, VC0501, VC0502, VC0503, VC0504, VC0505, VC0506, VC0508, VC0509, VC0510, VC0512	Var-4	PRJNA1195958	Mathur et al. 2025, bioRxiv
BD_2021_BFS789	BFS789	2021	BD-1.2a	ctxB7	No data	No data	PLE(-)	NC_002505.1_cds_WP_306461095.1_14, VC0495, VC0496, VC0497, VC0498, VC0499, VC0501, VC0502, VC0503, VC0504, VC0505, VC0506, VC0508, VC0509, VC0510, VC0512	Var-4	PRJNA1195958	Mathur et al. 2025, bioRxiv
BD_2021_BFS1033	BFS1033	2021	BD-1.2a	ctxB7	No data	No data	PLE(-)	NC_002505.1_cds_WP_306461095.1_14, VC0495, VC0496, VC0497, VC0498, VC0499, VC0501, VC0502, VC0503, VC0504, VC0505, VC0506, VC0508, VC0509, VC0510, VC0512	Var-4	PRJNA1195958	Mathur et al. 2025, bioRxiv
BD_2021_BFS882	BFS882	2021	BD-1.2a	ctxB7	No data	No data	PLE(-)	NC_002505.1_cds_WP_306461095.1_14, VC0495, VC0496, VC0497, VC0498, VC0499, VC0501, VC0502, VC0503, VC0504, VC0505, VC0506, VC0508, VC0509, VC0510, VC0512	Var-4	PRJNA1195958	Mathur et al. 2025, bioRxiv
BD_2021_BFS792	BFS792	2021	BD-1.2a	ctxB7	No data	No data	PLE(-)	NC_002505.1_cds_WP_306461095.1_14, VC0495, VC0496, VC0497, VC0498, VC0499, VC0501, VC0502, VC0503, VC0504, VC0505, VC0506, VC0508, VC0509, VC0510, VC0512	Var-4	PRJNA1195958	Mathur et al. 2025, bioRxiv
BD_2021_BFS865	BFS865	2021	BD-1.2a	ctxB7	No data	No data	PLE(-)	NC_002505.1_cds_WP_306461095.1_14, VC0495, VC0496, VC0497, VC0498, VC0499, VC0501, VC0502, VC0503, VC0504, VC0505, VC0506, VC0508, VC0509, VC0510, VC0512	Var-4	PRJNA1195958	Mathur et al. 2025, bioRxiv
BD_2021_BFS844	BFS844	2021	BD-1.2a	ctxB7	No data	No data	PLE(-)	NC_002505.1_cds_WP_306461095.1_14, VC0495, VC0496, VC0497, VC0498, VC0499, VC0501, VC0502, VC0503, VC0504, VC0505, VC0506, VC0508, VC0509, VC0510, VC0512	Var-4	PRJNA1195958	Mathur et al. 2025, bioRxiv
BD_2021_BFS1056	BFS1056	2021	BD-1.2b	ctxB7	No data	No data	PLE(-)	NC_002505.1_cds_WP_306461095.1_14, VC0495, VC0496, VC0497, VC0498, VC0499, VC0501, VC0502, VC0503, VC0504, VC0505, VC0506, VC0508, VC0509, VC0510, VC0512	Var-4	PRJNA1195958	Mathur et al. 2025, bioRxiv
BD_2021_BFS786	BFS786	2021	BD-1.2b	ctxB7	No data	No data	PLE(-)	NC_002505.1_cds_WP_306461095.1_14, VC0495, VC0496, VC0497, VC0498, VC0499, VC0501, VC0502, VC0503, VC0504, VC0505, VC0506, VC0508, VC0509, VC0510, VC0512	Var-4	PRJNA1195958	Mathur et al. 2025, bioRxiv
BD_2021_BFS1034	BFS1034	2021	BD-1.2b	ctxB7	No data	No data	PLE(-)	NC_002505.1_cds_WP_306461095.1_14, VC0495, VC0496, VC0497, VC0498, VC0499, VC0501, VC0502, VC0503, VC0504, VC0505, VC0506, VC0508, VC0509, VC0510, VC0512	Var-4	PRJNA1195958	Mathur et al. 2025, bioRxiv
BD_2021_BFS1011	BFS1011	2021	BD-1.2b	ctxB7	No data	No data	PLE(-)	NC_002505.1_cds_WP_306461095.1_14, VC0495, VC0496, VC0497, VC0498, VC0499, VC0501, VC0502, VC0503, VC0504, VC0505, VC0506, VC0508, VC0509, VC0510, VC0512	Var-4	PRJNA1195958	Mathur et al. 2025, bioRxiv
BD_2021_DRR395013	DMAVC-20	2021	BD-1.2a	ctxB7	Inaba	Clinical	PLE_11	NC_002505.1_cds_WP_306461095.1_14, VC0495, VC0496, VC0497, VC0498, VC0499, VC0501, VC0502, VC0503, VC0504, VC0505, VC0506, VC0508, VC0509, VC0510, VC0512	Var-4	DRR395013	Monir et al. 2023, Nat Com
BD_2022_BFS1027	BFS1027	2022	BD-1.2	ctxB7	No data	No data	PLE(-)	NC_002505.1_cds_WP_306461095.1_14, VC0495, VC0496, VC0497, VC0498, VC0499, VC0501, VC0502, VC0503, VC0504, VC0505, VC0506, VC0508, VC0509, VC0510, VC0512	Var-4	PRJNA1195958	Mathur et al. 2025, bioRxiv
BD_2022_BFS1028	BFS1028	2022	BD-1.2	ctxB7	No data	No data	PLE(-)	NC_002505.1_cds_WP_306461095.1_14, VC0495, VC0496, VC0497, VC0498, VC0499, VC0501, VC0502, VC0503, VC0504, VC0505, VC0506, VC0508, VC0509, VC0510, VC0512	Var-4	PRJNA1195958	Mathur et al. 2025, bioRxiv
BD_2022_BFS1025	BFS1025	2022	BD-1.2	ctxB7	No data	No data	PLE(-)	NC_002505.1_cds_WP_306461095.1_14, VC0495, VC0496, VC0497, VC0498, VC0499, VC0501, VC0502, VC0503, VC0504, VC0505, VC0506, VC0508, VC0509, VC0510, VC0512	Var-4	PRJNA1195958	Mathur et al. 2025, bioRxiv
BD_2022_BFS1168	BFS1168	2022	BD-1.2	ctxB7	No data	No data	PLE(-)	NC_002505.1_cds_WP_306461095.1_14, VC0495, VC0496, VC0497, VC0498, VC0499, VC0501, VC0502, VC0503, VC0504, VC0505, VC0506, VC0508, VC0509, VC0510, VC0512	Var-4	PRJNA1195958	Mathur et al. 2025, bioRxiv
BD_2022_BFS1169	BFS1169	2022	BD-1.2	ctxB7	No data	No data	PLE(-)	NC_002505.1_cds_WP_306461095.1_14, VC0495, VC0496, VC0497, VC0498, VC0499, VC0501, VC0502, VC0503, VC0504, VC0505, VC0506, VC0508, VC0509, VC0510, VC0512	Var-4	PRJNA1195958	Mathur et al. 2025, bioRxiv
BD_2022_BFS1171	BFS1171	2022	BD-1.2	ctxB7	No data	No data	PLE(-)	NC_002505.1_cds_WP_306461095.1_14, VC0495, VC0496, VC0497, VC0498, VC0499, VC0501, VC0502, VC0503, VC0504, VC0505, VC0506, VC0508, VC0509, VC0510, VC0512	Var-4	PRJNA1195958	Mathur et al. 2025, bioRxiv
BD_2022_BFS1147	BFS1147	2022	BD-1.2	ctxB7	No data	No data	PLE(-)	NC_002505.1_cds_WP_306461095.1_14, VC0495, VC0496, VC0497, VC0498, VC0499, VC0501, VC0502, VC0503, VC0504, VC0505, VC0506, VC0508, VC0509, VC0510, VC0512	Var-4	PRJNA1195958	Mathur et al. 2025, bioRxiv
BD_2022_BFS1172	BFS1172	2022	BD-1.2	ctxB7	No data	No data	PLE(-)	NC_002505.1_cds_WP_306461095.1_14, VC0495, VC0496, VC0497, VC0498, VC0499, VC0501, VC0502, VC0503, VC0504, VC0505, VC0506, VC0508, VC0509, VC0510, VC0512	Var-4	PRJNA1195958	Mathur et al. 2025, bioRxiv
BD_2022_BFS1057	BFS1057	2022	BD-1.2a	ctxB7	No data	No data	PLE_11	NC_002505.1_cds_WP_306461095.1_14, VC0495, VC0496, VC0497, VC0498, VC0499, VC0501, VC0502, VC0503, VC0504, VC0505, VC0506, VC0508, VC0509, VC0510, VC0512	Var-4	PRJNA1195958	Mathur et al. 2025, bioRxiv
BD_2022_BFS1018	BFS1018	2022	BD-1.2a	ctxB7	No data	No data	PLE_11	NC_002505.1_cds_WP_306461095.1_14, VC0495, VC0496, VC0497, VC0498, VC0499, VC0501, VC0502, VC0503, VC0504, VC0505, VC0506, VC0508, VC0509, VC0510, VC0512	Var-4	PRJNA1195958	Mathur et al. 2025, bioRxiv
BD_2022_BFS1041	BFS1041	2022	BD-1.2a	ctxB7	No data	No data	PLE_11	NC_002505.1_cds_WP_306461095.1_14, VC0495, VC0496, VC0497, VC0498, VC0499, VC0501, VC0502, VC0503, VC0504, VC0505, VC0506, VC0508, VC0509, VC0510, VC0512	Var-4	PRJNA1195958	Mathur et al. 2025, bioRxiv
BD_2022_BFS1037	BFS1037	2022	BD-1.2a	ctxB7	No data	No data	PLE_11	NC_002505.1_cds_WP_306461095.1_14, VC0495, VC0496, VC0497, VC0498, VC0499, VC0501, VC0502, VC0503, VC0504, VC0505, VC0506, VC0508, VC0509, VC0510, VC0512	Var-4	PRJNA1195958	Mathur et al. 2025, bioRxiv
BD_2022_BFS1038	BFS1038	2022	BD-1.2a	ctxB7	No data	No data	PLE_11	NC_002505.1_cds_WP_306461095.1_14, VC0495, VC0496, VC0497, VC0498, VC0499, VC0501, VC0502, VC0503, VC0504, VC0505, VC0506, VC0508, VC0509, VC0510, VC0512	Var-4	PRJNA1195958	Mathur et al. 2025, bioRxiv
BD_2022_BFS1012	BFS1012	2022	BD-1.2a	ctxB7	No data	No data	PLE_11	NC_002505.1_cds_WP_306461095.1_14, VC0495, VC0496, VC0497, VC0498, VC0499, VC0501, VC0502, VC0503, VC0504, VC0505, VC0506, VC0508, VC0509, VC0510, VC0512	Var-4	PRJNA1195958	Mathur et al. 2025, bioRxiv
BD_2022_BFS1047	BFS1047	2022	BD-1.2a	ctxB7	No data	No data	PLE_11	NC_002505.1_cds_WP_306461095.1_14, VC0495, VC0496, VC0497, VC0498, VC0499, VC0501, VC0502, VC0503, VC0504, VC0505, VC0506, VC0508, VC0509, VC0510, VC0512	Var-4	PRJNA1195958	Mathur et al. 2025, bioRxiv
BD_2022_BFS1048	BFS1048	2022	BD-1.2a	ctxB7	No data	No data	PLE_11	NC_002505.1_cds_WP_306461095.1_14, VC0495, VC0496, VC0497, VC0498, VC0499, VC0501, VC0502, VC0503, VC0504, VC0505, VC0506, VC0508, VC0509, VC0510, VC0512	Var-4	PRJNA1195958	Mathur et al. 2025, bioRxiv
BD_2022_BFS1043	BFS1043	2022	BD-1.2a	ctxB7	No data	No data	PLE_11	NC_002505.1_cds_WP_306461095.1_14, VC0495, VC0496, VC0497, VC0498, VC0499, VC0501, VC0502, VC0503, VC0504, VC0505, VC0506, VC0508, VC0509, VC0510, VC0512	Var-4	PRJNA1195958	Mathur et al. 2025, bioRxiv
BD_2022_BFS1061	BFS1061	2022	BD-1.2a	ctxB7	No data	No data	PLE_11	NC_002505.1_cds_WP_306461095.1_14, VC0495, VC0496, VC0497, VC0498, VC0499, VC0501, VC0502, VC0503, VC0504, VC0505, VC0506, VC0508, VC0509, VC0510, VC0512	Var-4	PRJNA1195958	Mathur et al. 2025, bioRxiv
BD_2022_BFS1022	BFS1022	2022	BD-1.2b	ctxB7	No data	No data	PLE_11	NC_002505.1_cds_WP_306461095.1_14, VC0495, VC0496, VC0497, VC0498, VC0499, VC0501, VC0502, VC0503, VC0504, VC0505, VC0506, VC0508, VC0509, VC0510, VC0512	Var-4	PRJNA1195958	Mathur et al. 2025, bioRxiv
BD_2022_BFS1170	BFS1170	2022	BD-1.2b	ctxB7	No data	No data	PLE_11	NC_002505.1_cds_WP_306461095.1_14, VC0495, VC0496, VC0497, VC0498, VC0499, VC0501, VC0502, VC0503, VC0504, VC0505, VC0506, VC0508, VC0509, VC0510, VC0512	Var-4	PRJNA1195958	Mathur et al. 2025, bioRxiv
BD_2022_BFS1053	BFS1053	2022	BD-1.2b	ctxB7	No data	No data	PLE(-)	NC_002505.1_cds_WP_306461095.1_14, VC0495, VC0496, VC0497, VC0498, VC0499, VC0501, VC0502, VC0503, VC0504, VC0505, VC0506, VC0508, VC0509, VC0510, VC0512	Var-4	PRJNA1195958	Mathur et al. 2025, bioRxiv
BD_2022_BFS1065	BFS1065	2022	BD-1.2b	ctxB7	No data	No data	PLE_11	NC_002505.1_cds_WP_306461095.1_14, VC0495, VC0496, VC0497, VC0498, VC0499, VC0501, VC0502, VC0503, VC0504, VC0505, VC0506, VC0508, VC0509, VC0510, VC0512	Var-4	PRJNA1195958	Mathur et al. 2025, bioRxiv
BD_2022_BFS1024	BFS1024	2022	BD-1.2b	ctxB7	No data	No data	PLE_11	NC_002505.1_cds_WP_306461095.1_14, VC0495, VC0496, VC0497, VC0498, VC0499, VC0501, VC0502, VC0503, VC0504, VC0505, VC0506, VC0508, VC0509, VC0510, VC0512	Var-4	PRJNA1195958	Mathur et al. 2025, bioRxiv
BD_2022_BFS1149	BFS1149	2022	BD-1.2b	ctxB7	No data	No data	PLE_11	NC_002505.1_cds_WP_306461095.1_14, VC0495, VC0496, VC0497, VC0498, VC0499, VC0501, VC0502, VC0503, VC0504, VC0505, VC0506, VC0508, VC0509, VC0510, VC0512	Var-4	PRJNA1195958	Mathur et al. 2025, bioRxiv
BD_2022_BFS1020	BFS1020	2022	BD-1.2b	ctxB7	No data	No data	PLE_11	NC_002505.1_cds_WP_306461095.1_14, VC0495, VC0496, VC0497, VC0498, VC0499, VC0501, VC0502, VC0503, VC0504, VC0505, VC0506, VC0508, VC0509, VC0510, VC0512	Var-4	PRJNA1195958	Mathur et al. 2025, bioRxiv
BD_2022_BFS1016	BFS1016	2022	BD-1.2b	ctxB7	No data	No data	PLE_11	NC_002505.1_cds_WP_306461095.1_14, VC0495, VC0496, VC0497, VC0498, VC0499, VC0501, VC0502, VC0503, VC0504, VC0505, VC0506, VC0508, VC0509, VC0510, VC0512	Var-4	PRJNA1195958	Mathur et al. 2025, bioRxiv
BD_2022_BFS1049	BFS1049	2022	BD-1.2b	ctxB7	No data	No data	PLE_11	NC_002505.1_cds_WP_306461095.1_14, VC0495, VC0496, VC0497, VC0498, VC0499, VC0501, VC0502, VC0503, VC0504, VC0505, VC0506, VC0508, VC0509, VC0510, VC0512	Var-4	PRJNA1195958	Mathur et al. 2025, bioRxiv
BD_2022_BFS1151	BFS1151	2022	BD-1.2b	ctxB7	No data	No data	PLE_11	NC_002505.1_cds_WP_306461095.1_14, VC0495, VC0496, VC0497, VC0498, VC0499, VC0501, VC0502, VC0503, VC0504, VC0505, VC0506, VC0508, VC0509, VC0510, VC0512	Var-4	PRJNA1195958	Mathur et al. 2025, bioRxiv
BD_2022_BFS1146	BFS1146	2022	BD-1.2b	ctxB7	No data	No data	PLE_11	NC_002505.1_cds_WP_306461095.1_14, VC0495, VC0496, VC0497, VC0498, VC0499, VC0501, VC0502, VC0503, VC0504, VC0505, VC0506, VC0508, VC0509, VC0510, VC0512	Var-4	PRJNA1195958	Mathur et al. 2025, bioRxiv
BD_2022_BFS1150	BFS1150	2022	BD-1.2b	ctxB7	No data	No data	PLE_11	NC_002505.1_cds_WP_306461095.1_14, VC0495, VC0496, VC0497, VC0498, VC0499, VC0501, VC0502, VC0503, VC0504, VC0505, VC0506, VC0508, VC0509, VC0510, VC0512	Var-4	PRJNA1195958	Mathur et al. 2025, bioRxiv
BD_2022_BFS1029	BFS1029	2022	BD-1.2b	ctxB7	No data	No data	PLE_11	NC_002505.1_cds_WP_306461095.1_14, VC0495, VC0496, VC0497, VC0498, VC0499, VC0501, VC0502, VC0503, VC0504, VC0505, VC0506, VC0508, VC0509, VC0510, VC0512	Var-4	PRJNA1195958	Mathur et al. 2025, bioRxiv
BD_2022_BFS1148	BFS1148	2022	BD-1.2b	ctxB7	No data	No data	PLE_11	NC_002505.1_cds_WP_306461095.1_14, VC0495, VC0496, VC0497, VC0498, VC0499, VC0501, VC0502, VC0503, VC0504, VC0505, VC0506, VC0508, VC0509, VC0510, VC0512	Var-4	PRJNA1195958	Mathur et al. 2025, bioRxiv
BD_2022_BFS1152	BFS1152	2022	BD-1.2b	ctxB7	No data	No data	PLE_11	NC_002505.1_cds_WP_306461095.1_14, VC0495, VC0496, VC0497, VC0498, VC0499, VC0501, VC0502, VC0503, VC0504, VC0505, VC0506, VC0508, VC0509, VC0510, VC0512	Var-4	PRJNA1195958	Mathur et al. 2025, bioRxiv
BD_2022_BFS1045	BFS1045	2022	BD-1.2b	ctxB7	No data	No data	PLE(-)	NC_002505.1_cds_WP_306461095.1_14, VC0495, VC0496, VC0497, VC0498, VC0499, VC0501, VC0502, VC0503, VC0504, VC0505, VC0506, VC0508, VC0509, VC0510, VC0512	Var-4	PRJNA1195958	Mathur et al. 2025, bioRxiv
BD_2022_BFS1019	BFS1019	2022	BD-1.2b	ctxB7	No data	No data	PLE_11	NC_002505.1_cds_WP_306461095.1_14, VC0495, VC0496, VC0497, VC0498, VC0499, VC0501, VC0502, VC0503, VC0504, VC0505, VC0506, VC0508, VC0509, VC0510, VC0512	Var-4	PRJNA1195958	Mathur et al. 2025, bioRxiv
BD_2022_BFS1035	BFS1035	2022	BD-1.2b	ctxB7	No data	No data	PLE(-)	NC_002505.1_cds_WP_306461095.1_14, VC0495, VC0496, VC0497, VC0498, VC0499, VC0501, VC0502, VC0503, VC0504, VC0505, VC0506, VC0508, VC0509, VC0510, VC0512	Var-4	PRJNA1195958	Mathur et al. 2025, bioRxiv
BD_2022_BFS1059	BFS1059	2022	BD-1.2b	ctxB7	No data	No data	PLE_11	NC_002505.1_cds_WP_306461095.1_14, VC0495, VC0496, VC0497, VC0498, VC0499, VC0501, VC0502, VC0503, VC0504, VC0505, VC0506, VC0508, VC0509, VC0510, VC0512	Var-4	PRJNA1195958	Mathur et al. 2025, bioRxiv
BD_2022_BFS1023	BFS1023	2022	BD-1.2b	ctxB7	No data	No data	PLE_11	NC_002505.1_cds_WP_306461095.1_14, VC0495, VC0496, VC0497, VC0498, VC0499, VC0501, VC0502, VC0503, VC0504, VC0505, VC0506, VC0508, VC0509, VC0510, VC0512	Var-4	PRJNA1195958	Mathur et al. 2025, bioRxiv
BD_2022_BFS1063	BFS1063	2022	BD-1.2b	ctxB7	No data	No data	PLE_11	NC_002505.1_cds_WP_306461095.1_14, VC0495, VC0496, VC0497, VC0498, VC0499, VC0501, VC0502, VC0503, VC0504, VC0505, VC0506, VC0508, VC0509, VC0510, VC0512	Var-4	PRJNA1195958	Mathur et al. 2025, bioRxiv
BD_2022_BFS1052	BFS1052	2022	BD-1.2b	ctxB7	No data	No data	PLE(-)	NC_002505.1_cds_WP_306461095.1_14, VC0495, VC0496, VC0497, VC0498, VC0499, VC0501, VC0502, VC0503, VC0504, VC0505, VC0506, VC0508, VC0509, VC0510, VC0512	Var-4	PRJNA1195958	Mathur et al. 2025, bioRxiv
BD_2022_BFS1021	BFS1021	2022	BD-1.2b	ctxB7	No data	No data	PLE_11	NC_002505.1_cds_WP_306461095.1_14, VC0495, VC0496, VC0497, VC0498, VC0499, VC0501, VC0502, VC0503, VC0504, VC0505, VC0506, VC0508, VC0509, VC0510, VC0512	Var-4	PRJNA1195958	Mathur et al. 2025, bioRxiv
BD_2022_BFS1017	BFS1017	2022	BD-1.2b	ctxB7	No data	No data	PLE_11	NC_002505.1_cds_WP_306461095.1_14, VC0495, VC0496, VC0497, VC0498, VC0499, VC0501, VC0502, VC0503, VC0504, VC0505, VC0506, VC0508, VC0509, VC0510, VC0512	Var-4	PRJNA1195958	Mathur et al. 2025, bioRxiv
BD_2022_BFS1015	BFS1015	2022	BD-1.2b	ctxB7	No data	No data	PLE(-)	NC_002505.1_cds_WP_306461095.1_14, VC0495, VC0496, VC0497, VC0498, VC0499, VC0501, VC0502, VC0503, VC0504, VC0505, VC0506, VC0508, VC0509, VC0510, VC0512	Var-4	PRJNA1195958	Mathur et al. 2025, bioRxiv
BD_2022_BFS1014	BFS1014	2022	BD-1.2b	ctxB7	No data	No data	PLE(-)	NC_002505.1_cds_WP_306461095.1_14, VC0495, VC0496, VC0497, VC0498, VC0499, VC0501, VC0502, VC0503, VC0504, VC0505, VC0506, VC0508, VC0509, VC0510, VC0512	Var-4	PRJNA1195958	Mathur et al. 2025, bioRxiv
BD_2022_BFS1060	BFS1060	2022	BD-1.2b	ctxB7	No data	No data	PLE_11	NC_002505.1_cds_WP_306461095.1_14, VC0495, VC0496, VC0497, VC0498, VC0499, VC0501, VC0502, VC0503, VC0504, VC0505, VC0506, VC0508, VC0509, VC0510, VC0512	Var-4	PRJNA1195958	Mathur et al. 2025, bioRxiv
BD_2022_DRR395009	DMAVC-16	2022	BD-1.2a	ctxB7	Inaba	Clinical	PLE_11	NC_002505.1_cds_WP_306461095.1_14, VC0495, VC0496, VC0497, VC0498, VC0499, VC0501, VC0502, VC0503, VC0504, VC0505, VC0506, VC0508, VC0509, VC0510, VC0512	Var-4	DRR395009	Monir et al. 2023, Nat Com
BD_2022_DRR395008	DMAVC-15	2022	BD-1.2b	ctxB7	Ogawa	Clinical	PLE(-)	NC_002505.1_cds_WP_306461095.1_14, VC0495, VC0496, VC0497, VC0498, VC0499, VC0501, VC0502, VC0503, VC0504, VC0505, VC0506, VC0508, VC0509, VC0510, VC0512	Var-4	DRR395008	Monir et al. 2023, Nat Com
BD_2022_DRR395015	DMAVC-22	2022	BD-1.2a	ctxB7	Inaba	Clinical	PLE_11	NC_002505.1_cds_WP_306461095.1_14, VC0495, VC0496, VC0497, VC0498, VC0499, VC0501, VC0502, VC0503, VC0504, VC0505, VC0506, VC0508, VC0509, VC0510, VC0512	Var-4	DRR395015	Monir et al. 2023, Nat Com
BD_2022_DRR395011	DMAVC-18	2022	BD-1.2b	ctxB7	Ogawa	Clinical	PLE_11	NC_002505.1_cds_WP_306461095.1_14, VC0495, VC0496, VC0497, VC0498, VC0499, VC0501, VC0502, VC0503, VC0504, VC0505, VC0506, VC0508, VC0509, VC0510, VC0512	Var-4	DRR395011	Monir et al. 2023, Nat Com
BD_2022_DRR395010	DMAVC-17	2022	BD-1.2b	ctxB7	Ogawa	Clinical	PLE_11	NC_002505.1_cds_WP_306461095.1_14, VC0495, VC0496, VC0497, VC0498, VC0499, VC0501, VC0502, VC0503, VC0504, VC0505, VC0506, VC0508, VC0509, VC0510, VC0512	Var-4	DRR395010	Monir et al. 2023, Nat Com
BD_2022_DRR394996	DMAVC-3	2022	BD-1.2a	ctxB7	Inaba	Clinical	PLE_11	NC_002505.1_cds_WP_306461095.1_14, VC0495, VC0496, VC0497, VC0498, VC0499, VC0501, VC0502, VC0503, VC0504, VC0505, VC0506, VC0508, VC0509, VC0510, VC0512	Var-4	DRR394996	Monir et al. 2023, Nat Com
BD_2022_DRR394994	DMAVC-1	2022	BD-1.2a	ctxB7	Inaba	Clinical	PLE_11	NC_002505.1_cds_WP_306461095.1_14, VC0495, VC0496, VC0497, VC0498, VC0499, VC0501, VC0502, VC0503, VC0504, VC0505, VC0506, VC0508, VC0509, VC0510, VC0512	Var-4	DRR394994	Monir et al. 2023, Nat Com
BD_2022_DRR394995	DMAVC-2	2022	BD-1.2a	ctxB7	Inaba	Clinical	PLE_11	NC_002505.1_cds_WP_306461095.1_14, VC0495, VC0496, VC0497, VC0498, VC0499, VC0501, VC0502, VC0503, VC0504, VC0505, VC0506, VC0508, VC0509, VC0510, VC0512	Var-4	DRR394995	Monir et al. 2023, Nat Com
BD_2022_DRR394999	DMAVC-6	2022	BD-1.2a	ctxB7	Inaba	Clinical	PLE_11	NC_002505.1_cds_WP_306461095.1_14, VC0495, VC0496, VC0497, VC0498, VC0499, VC0501, VC0502, VC0503, VC0504, VC0505, VC0506, VC0508, VC0509, VC0510, VC0512	Var-4	DRR394999	Monir et al. 2023, Nat Com
BD_2022_DRR394997	DMAVC-4	2022	BD-1.2b	ctxB7	Ogawa	Clinical	PLE(-)	NC_002505.1_cds_WP_306461095.1_14, VC0495, VC0496, VC0497, VC0498, VC0499, VC0501, VC0502, VC0503, VC0504, VC0505, VC0506, VC0508, VC0509, VC0510, VC0512	Var-4	DRR394997	Monir et al. 2023, Nat Com
BD_2022_DRR395003	DMAVC-10	2022	BD-1.2a	ctxB7	Inaba	Clinical	PLE_11	NC_002505.1_cds_WP_306461095.1_14, VC0495, VC0496, VC0497, VC0498, VC0499, VC0501, VC0502, VC0503, VC0504, VC0505, VC0506, VC0508, VC0509, VC0510, VC0512	Var-4	DRR395003	Monir et al. 2023, Nat Com
BD_2022_DRR395002	DMAVC-9	2022	BD-1.2a	ctxB7	Inaba	Clinical	PLE_11	NC_002505.1_cds_WP_306461095.1_14, VC0495, VC0496, VC0497, VC0498, VC0499, VC0501, VC0502, VC0503, VC0504, VC0505, VC0506, VC0508, VC0509, VC0510, VC0512	Var-4	DRR395002	Monir et al. 2023, Nat Com
BD_2022_DRR395000	DMAVC-7	2022	BD-1.2a	ctxB7	Inaba	Clinical	PLE_11	NC_002505.1_cds_WP_306461095.1_14, VC0495, VC0496, VC0497, VC0498, VC0499, VC0501, VC0502, VC0503, VC0504, VC0505, VC0506, VC0508, VC0509, VC0510, VC0512	Var-4	DRR395000	Monir et al. 2023, Nat Com
BD_2022_DRR395001	DMAVC-8	2022	BD-1.2b	ctxB7	Ogawa	Clinical	PLE_11	NC_002505.1_cds_WP_306461095.1_14, VC0495, VC0496, VC0497, VC0498, VC0499, VC0501, VC0502, VC0503, VC0504, VC0505, VC0506, VC0508, VC0509, VC0510, VC0512	Var-4	DRR395001	Monir et al. 2023, Nat Com
BD_2022_DRR395004	DMAVC-11	2022	BD-1.2a	ctxB7	Inaba	Clinical	PLE_11	NC_002505.1_cds_WP_306461095.1_14, VC0495, VC0496, VC0497, VC0498, VC0499, VC0501, VC0502, VC0503, VC0504, VC0505, VC0506, VC0508, VC0509, VC0510, VC0512	Var-4	DRR395004	Monir et al. 2023, Nat Com
BD_2022_DRR395006	DMAVC-13	2022	BD-1.2a	ctxB7	Inaba	Clinical	PLE_11	NC_002505.1_cds_WP_306461095.1_14, VC0495, VC0496, VC0497, VC0498, VC0499, VC0501, VC0502, VC0503, VC0504, VC0505, VC0506, VC0508, VC0509, VC0510, VC0512	Var-4	DRR395006	Monir et al. 2023, Nat Com
BD_2022_DRR395007	DMAVC-14	2022	BD-1.2a	ctxB7	Inaba	Clinical	PLE_11	NC_002505.1_cds_WP_306461095.1_14, VC0495, VC0496, VC0497, VC0498, VC0499, VC0501, VC0502, VC0503, VC0504, VC0505, VC0506, VC0508, VC0509, VC0510, VC0512	Var-4	DRR395007	Monir et al. 2023, Nat Com
BD_2022_DRR395005	DMAVC-12	2022	BD-1.2a	ctxB7	Inaba	Clinical	PLE_11	NC_002505.1_cds_WP_306461095.1_14, VC0495, VC0496, VC0497, VC0498, VC0499, VC0501, VC0502, VC0503, VC0504, VC0505, VC0506, VC0508, VC0509, VC0510, VC0512	Var-4	DRR395005	Monir et al. 2023, Nat Com
BD_2022_DRR395014	DMAVC-21	2022	BD-1.2b	ctxB7	Ogawa	Clinical	PLE(-)	NC_002505.1_cds_WP_306461095.1_14, VC0495, VC0496, VC0497, VC0498, VC0499, VC0501, VC0502, VC0503, VC0504, VC0505, VC0506, VC0508, VC0509, VC0510, VC0512	Var-4	DRR395014	Monir et al. 2023, Nat Com
BD_2022_DRR395012	DMAVC-19	2022	BD-1.2b	ctxB7	Ogawa	Clinical	PLE_11	NC_002505.1_cds_WP_306461095.1_14, VC0495, VC0496, VC0497, VC0498, VC0499, VC0501, VC0502, VC0503, VC0504, VC0505, VC0506, VC0508, VC0509, VC0510, VC0512	Var-4	DRR395012	Monir et al. 2023, Nat Com
BD_2023_BFS1135	BFS1135	2023	BD-1.2b	ctxB7	No data	No data	PLE_11	NC_002505.1_cds_WP_306461095.1_14, VC0495, VC0496, VC0497, VC0498, VC0499, VC0501, VC0502, VC0503, VC0504, VC0505, VC0506, VC0508, VC0509, VC0510, VC0512	Var-4	PRJNA1195958	Mathur et al. 2025, bioRxiv
BD_2023_BFS1154	BFS1154	2023	BD-1.2b	ctxB7	No data	No data	PLE_11	NC_002505.1_cds_WP_306461095.1_14, VC0495, VC0496, VC0497, VC0498, VC0499, VC0501, VC0502, VC0503, VC0504, VC0505, VC0506, VC0508, VC0509, VC0510, VC0512	Var-4	PRJNA1195958	Mathur et al. 2025, bioRxiv
BD_2023_BFS1159	BFS1159	2023	BD-1.2b	ctxB7	No data	No data	PLE_11	NC_002505.1_cds_WP_306461095.1_14, VC0495, VC0496, VC0497, VC0498, VC0499, VC0501, VC0502, VC0503, VC0504, VC0505, VC0506, VC0508, VC0509, VC0510, VC0512	Var-4	PRJNA1195958	Mathur et al. 2025, bioRxiv
BD_2023_BFS1153	BFS1153	2023	BD-1.2b	ctxB7	No data	No data	PLE_11	NC_002505.1_cds_WP_306461095.1_14, VC0495, VC0496, VC0497, VC0498, VC0499, VC0501, VC0502, VC0503, VC0504, VC0505, VC0506, VC0508, VC0509, VC0510, VC0512	Var-4	PRJNA1195958	Mathur et al. 2025, bioRxiv
BD_2023_BFS1157	BFS1157	2023	BD-1.2b	ctxB7	No data	No data	PLE_11	NC_002505.1_cds_WP_306461095.1_14, VC0495, VC0496, VC0497, VC0498, VC0499, VC0501, VC0502, VC0503, VC0504, VC0505, VC0506, VC0508, VC0509, VC0510, VC0512	Var-4	PRJNA1195958	Mathur et al. 2025, bioRxiv
BD_2023_BFS1125	BFS1125	2023	BD-1.2b	ctxB7	No data	No data	PLE_11	NC_002505.1_cds_WP_306461095.1_14, VC0495, VC0496, VC0497, VC0498, VC0499, VC0501, VC0502, VC0503, VC0504, VC0505, VC0506, VC0508, VC0509, VC0510, VC0512	Var-4	PRJNA1195958	Mathur et al. 2025, bioRxiv
BD_2023_BFS1121	BFS1121	2023	BD-1.2b	ctxB7	No data	No data	PLE_11	NC_002505.1_cds_WP_306461095.1_14, VC0495, VC0496, VC0497, VC0498, VC0499, VC0501, VC0502, VC0503, VC0504, VC0505, VC0506, VC0508, VC0509, VC0510, VC0512	Var-4	PRJNA1195958	Mathur et al. 2025, bioRxiv
BD_2023_BFS1140	BFS1140	2023	BD-1.2b	ctxB7	No data	No data	PLE_11	NC_002505.1_cds_WP_306461095.1_14, VC0495, VC0496, VC0497, VC0498, VC0499, VC0501, VC0502, VC0503, VC0504, VC0505, VC0506, VC0508, VC0509, VC0510, VC0512	Var-4	PRJNA1195958	Mathur et al. 2025, bioRxiv
BD_2023_BFS1166	BFS1166	2023	BD-1.2b	ctxB7	No data	No data	PLE_11	NC_002505.1_cds_WP_306461095.1_14, VC0495, VC0496, VC0497, VC0498, VC0499, VC0501, VC0502, VC0503, VC0504, VC0505, VC0506, VC0508, VC0509, VC0510, VC0512	Var-4	PRJNA1195958	Mathur et al. 2025, bioRxiv
BD_2023_BFS1143	BFS1143	2023	BD-1.2b	ctxB7	No data	No data	PLE_11	NC_002505.1_cds_WP_306461095.1_14, VC0495, VC0496, VC0497, VC0498, VC0499, VC0501, VC0502, VC0503, VC0504, VC0505, VC0506, VC0508, VC0509, VC0510, VC0512	Var-4	PRJNA1195958	Mathur et al. 2025, bioRxiv
BD_2023_BFS1142	BFS1142	2023	BD-1.2b	ctxB7	No data	No data	PLE_11	NC_002505.1_cds_WP_306461095.1_14, VC0495, VC0496, VC0497, VC0498, VC0499, VC0501, VC0502, VC0503, VC0504, VC0505, VC0506, VC0508, VC0509, VC0510, VC0512	Var-4	PRJNA1195958	Mathur et al. 2025, bioRxiv
BD_2023_BFS1139	BFS1139	2023	BD-1.2b	ctxB7	No data	No data	PLE_11	NC_002505.1_cds_WP_306461095.1_14, VC0495, VC0496, VC0497, VC0498, VC0499, VC0501, VC0502, VC0503, VC0504, VC0505, VC0506, VC0508, VC0509, VC0510, VC0512	Var-4	PRJNA1195958	Mathur et al. 2025, bioRxiv
BD_2023_BFS1112	BFS1112	2023	BD-1.2b	ctxB7	No data	No data	PLE_11	NC_002505.1_cds_WP_306461095.1_14, VC0495, VC0496, VC0497, VC0498, VC0499, VC0501, VC0502, VC0503, VC0504, VC0505, VC0506, VC0508, VC0509, VC0510, VC0512	Var-4	PRJNA1195958	Mathur et al. 2025, bioRxiv
BD_2023_BFS1158	BFS1158	2023	BD-1.2b	ctxB7	No data	No data	PLE_11	NC_002505.1_cds_WP_306461095.1_14, VC0495, VC0496, VC0497, VC0498, VC0499, VC0501, VC0502, VC0503, VC0504, VC0505, VC0506, VC0508, VC0509, VC0510, VC0512	Var-4	PRJNA1195958	Mathur et al. 2025, bioRxiv
BD_2023_BFS1116	BFS1116	2023	BD-1.2b	ctxB7	No data	No data	PLE_11	NC_002505.1_cds_WP_306461095.1_14, VC0495, VC0496, VC0497, VC0498, VC0499, VC0501, VC0502, VC0503, VC0504, VC0505, VC0506, VC0508, VC0509, VC0510, VC0512	Var-4	PRJNA1195958	Mathur et al. 2025, bioRxiv
BD_2023_BFS1117	BFS1117	2023	BD-1.2b	ctxB7	No data	No data	PLE_11	NC_002505.1_cds_WP_306461095.1_14, VC0495, VC0496, VC0497, VC0498, VC0499, VC0501, VC0502, VC0503, VC0504, VC0505, VC0506, VC0508, VC0509, VC0510, VC0512	Var-4	PRJNA1195958	Mathur et al. 2025, bioRxiv
BD_2023_BFS1114	BFS1114	2023	BD-1.2b	ctxB7	No data	No data	PLE_11	NC_002505.1_cds_WP_306461095.1_14, VC0495, VC0496, VC0497, VC0498, VC0499, VC0501, VC0502, VC0503, VC0504, VC0505, VC0506, VC0508, VC0509, VC0510, VC0512	Var-4	PRJNA1195958	Mathur et al. 2025, bioRxiv
BD_2023_BFS1162	BFS1162	2023	BD-1.2b	ctxB7	No data	No data	PLE_11	NC_002505.1_cds_WP_306461095.1_14, VC0495, VC0496, VC0497, VC0498, VC0499, VC0501, VC0502, VC0503, VC0504, VC0505, VC0506, VC0508, VC0509, VC0510, VC0512	Var-4	PRJNA1195958	Mathur et al. 2025, bioRxiv
BD_2023_BFS1165	BFS1165	2023	BD-1.2b	ctxB7	No data	No data	PLE_11	NC_002505.1_cds_WP_306461095.1_14, VC0495, VC0496, VC0497, VC0498, VC0499, VC0501, VC0502, VC0503, VC0504, VC0505, VC0506, VC0508, VC0509, VC0510, VC0512	Var-4	PRJNA1195958	Mathur et al. 2025, bioRxiv
BD_2023_BFS1128	BFS1128	2023	BD-1.2b	ctxB7	No data	No data	PLE_11	NC_002505.1_cds_WP_306461095.1_14, VC0495, VC0496, VC0497, VC0498, VC0499, VC0501, VC0502, VC0503, VC0504, VC0505, VC0506, VC0508, VC0509, VC0510, VC0512	Var-4	PRJNA1195958	Mathur et al. 2025, bioRxiv
BD_2023_BFS1138	BFS1138	2023	BD-1.2b	ctxB7	No data	No data	PLE_11	NC_002505.1_cds_WP_306461095.1_14, VC0495, VC0496, VC0497, VC0498, VC0499, VC0501, VC0502, VC0503, VC0504, VC0505, VC0506, VC0508, VC0509, VC0510, VC0512	Var-4	PRJNA1195958	Mathur et al. 2025, bioRxiv
BD_2023_BFS1156	BFS1156	2023	BD-1.2b	ctxB7	No data	No data	PLE_11	NC_002505.1_cds_WP_306461095.1_14, VC0495, VC0496, VC0497, VC0498, VC0499, VC0501, VC0502, VC0503, VC0504, VC0505, VC0506, VC0508, VC0509, VC0510, VC0512	Var-4	PRJNA1195958	Mathur et al. 2025, bioRxiv
BD_2023_BFS1163	BFS1163	2023	BD-1.2b	ctxB7	No data	No data	PLE_11	NC_002505.1_cds_WP_306461095.1_14, VC0495, VC0496, VC0497, VC0498, VC0499, VC0501, VC0502, VC0503, VC0504, VC0505, VC0506, VC0508, VC0509, VC0510, VC0512	Var-4	PRJNA1195958	Mathur et al. 2025, bioRxiv
BD_2023_BFS1133	BFS1133	2023	BD-1.2b	ctxB7	No data	No data	PLE_11	NC_002505.1_cds_WP_306461095.1_14, VC0495, VC0496, VC0497, VC0498, VC0499, VC0501, VC0502, VC0503, VC0504, VC0505, VC0506, VC0508, VC0509, VC0510, VC0512	Var-4	PRJNA1195958	Mathur et al. 2025, bioRxiv
BD_2023_BFS1131	BFS1131	2023	BD-1.2b	ctxB7	No data	No data	PLE_11	NC_002505.1_cds_WP_306461095.1_14, VC0495, VC0496, VC0497, VC0498, VC0499, VC0501, VC0502, VC0503, VC0504, VC0505, VC0506, VC0508, VC0509, VC0510, VC0512	Var-4	PRJNA1195958	Mathur et al. 2025, bioRxiv
BD_2023_BFS1174	BFS1174	2023	BD-1.2b	ctxB7	No data	No data	PLE_11	NC_002505.1_cds_WP_306461095.1_14, VC0495, VC0496, VC0497, VC0498, VC0499, VC0501, VC0502, VC0503, VC0504, VC0505, VC0506, VC0508, VC0509, VC0510, VC0512	Var-4	PRJNA1195958	Mathur et al. 2025, bioRxiv
BD_2023_BFS1137	BFS1137	2023	BD-1.2b	ctxB7	No data	No data	PLE_11	NC_002505.1_cds_WP_306461095.1_14, VC0495, VC0496, VC0497, VC0498, VC0499, VC0501, VC0502, VC0503, VC0504, VC0505, VC0506, VC0508, VC0509, VC0510, VC0512	Var-4	PRJNA1195958	Mathur et al. 2025, bioRxiv
BD_2023_BFS1130	BFS1130	2023	BD-1.2b	ctxB7	No data	No data	PLE_11	NC_002505.1_cds_WP_306461095.1_14, VC0495, VC0496, VC0497, VC0498, VC0499, VC0501, VC0502, VC0503, VC0504, VC0505, VC0506, VC0508, VC0509, VC0510, VC0512	Var-4	PRJNA1195958	Mathur et al. 2025, bioRxiv
BD_2023_BFS1119	BFS1119	2023	BD-1.2b	ctxB7	No data	No data	PLE_11	NC_002505.1_cds_WP_306461095.1_14, VC0495, VC0496, VC0497, VC0498, VC0499, VC0501, VC0502, VC0503, VC0504, VC0505, VC0506, VC0508, VC0509, VC0510, VC0512	Var-4	PRJNA1195958	Mathur et al. 2025, bioRxiv
BD_2023_BFS1155	BFS1155	2023	BD-1.2b	ctxB7	No data	No data	PLE_11	NC_002505.1_cds_WP_306461095.1_14, VC0495, VC0496, VC0497, VC0498, VC0499, VC0501, VC0502, VC0503, VC0504, VC0505, VC0506, VC0508, VC0509, VC0510, VC0512	Var-4	PRJNA1195958	Mathur et al. 2025, bioRxiv
BD_2023_BFS1160	BFS1160	2023	BD-1.2b	ctxB7	No data	No data	PLE_11	NC_002505.1_cds_WP_306461095.1_14, VC0495, VC0496, VC0497, VC0498, VC0499, VC0501, VC0502, VC0503, VC0504, VC0505, VC0506, VC0508, VC0509, VC0510, VC0512	Var-4	PRJNA1195958	Mathur et al. 2025, bioRxiv
BD_2024_Sept26-49	Sept26-49	2024	BD-1.2b	ctxB7	No data	No data	PLE_11	NC_002505.1_cds_WP_306461095.1_14, VC0495, VC0496, VC0497, VC0498, VC0499, VC0501, VC0502, VC0503, VC0504, VC0505, VC0506, VC0508, VC0509, VC0510, VC0512	Var-4	(In process of submission)	This study
BD_2024_Sept26-55	Sept26-55	2024	BD-1.2b	ctxB7	No data	No data	PLE_11	NC_002505.1_cds_WP_306461095.1_14, VC0495, VC0496, VC0497, VC0498, VC0499, VC0501, VC0502, VC0503, VC0504, VC0505, VC0506, VC0508, VC0509, VC0510, VC0512	Var-4	(In process of submission)	This study
BD_2024_Sept26-52	Sept26-52	2024	BD-1.2b	ctxB7	No data	No data	PLE_11	NC_002505.1_cds_WP_306461095.1_14, VC0495, VC0496, VC0497, VC0498, VC0499, VC0501, VC0502, VC0503, VC0504, VC0505, VC0506, VC0508, VC0509, VC0510, VC0512	Var-4	(In process of submission)	This study
BD_2024_Sept26-59	Sept26-59	2024	BD-1.2b	ctxB7	No data	No data	PLE_11	NC_002505.1_cds_WP_306461095.1_14, VC0495, VC0496, VC0497, VC0498, VC0499, VC0501, VC0502, VC0503, VC0504, VC0505, VC0506, VC0508, VC0509, VC0510, VC0512	Var-4	(In process of submission)	This study
BD_2024_Sept26-53	Sept26-53	2024	BD-1.2b	ctxB7	No data	No data	PLE_11	NC_002505.1_cds_WP_306461095.1_14, VC0495, VC0496, VC0497, VC0498, VC0499, VC0501, VC0502, VC0503, VC0504, VC0505, VC0506, VC0508, VC0509, VC0510, VC0512	Var-4	(In process of submission)	This study
BD_2024_Sept26-57	Sept26-57	2024	BD-1.2b	ctxB7	No data	No data	PLE_11	NC_002505.1_cds_WP_306461095.1_14, VC0495, VC0496, VC0497, VC0498, VC0499, VC0501, VC0502, VC0503, VC0504, VC0505, VC0506, VC0508, VC0509, VC0510, VC0512	Var-4	(In process of submission)	This study
BD_2024_Sept26-58	Sept26-58	2024	BD-1.2b	ctxB7	No data	No data	PLE_11	NC_002505.1_cds_WP_306461095.1_14, VC0495, VC0496, VC0497, VC0498, VC0499, VC0501, VC0502, VC0503, VC0504, VC0505, VC0506, VC0508, VC0509, VC0510, VC0512	Var-4	(In process of submission)	This study
BD_2024_Sept26-56	Sept26-56	2024	BD-1.2b	ctxB7	No data	No data	PLE_11	NC_002505.1_cds_WP_306461095.1_14, VC0495, VC0496, VC0497, VC0498, VC0499, VC0501, VC0502, VC0503, VC0504, VC0505, VC0506, VC0508, VC0509, VC0510, VC0512	Var-4	(In process of submission)	This study
BD_2024_Sept26-50	Sept26-50	2024	BD-1.2b	ctxB7	No data	No data	PLE_11	NC_002505.1_cds_WP_306461095.1_14, VC0495, VC0496, VC0497, VC0498, VC0499, VC0501, VC0502, VC0503, VC0504, VC0505, VC0506, VC0508, VC0509, VC0510, VC0512	Var-4	(In process of submission)	This study
BD_2024_Sept26-51	Sept26-51	2024	BD-1.2b	ctxB7	No data	No data	PLE_11	NC_002505.1_cds_WP_306461095.1_14, VC0495, VC0496, VC0497, VC0498, VC0499, VC0501, VC0502, VC0503, VC0504, VC0505, VC0506, VC0508, VC0509, VC0510, VC0512	Var-4	(In process of submission)	This study
BD_2024_Sept26-54	Sept26-54	2024	BD-1.2b	ctxB7	No data	No data	PLE_11	NC_002505.1_cds_WP_306461095.1_14, VC0495, VC0496, VC0497, VC0498, VC0499, VC0501, VC0502, VC0503, VC0504, VC0505, VC0506, VC0508, VC0509, VC0510, VC0512	Var-4	(In process of submission)	This study

## Sheet: Suppl Table 2
Supplementary Table 2. VSP-2 types identified from the sequence data sets
Types	Deleted/truncated genes in the assembled contig files	Lineages/genetic group
		BD-0	BD-1	BD-1.1	BD-1.2	BD-1.2a	BD-1.2b	BD-2
sporadic	VC0512	4	0	0	0	0	0	0
sporadic	VC0489, VC0514
sporadic	VC0490, VC0513, VC0514, VC0515
sporadic	VC0490, VC0491, VC0513, VC0514, VC0515
Var1	VC0495, VC0496, VC0497, VC0498	0	1	0	0	0	0	0
Var-2	VC0495, VC0496, VC0497, VC0498, VC0499	0	1	0	0	0	0	61
Var2*	VC0495, VC0496, VC0497, VC0498, VC0499, VC0513	0	0	0	0	0	0	2
Var2*	VC0495, VC0496, VC0497, VC0498, VC0499, VC0502
Var-3	VC0491, VC0492, VC0493, VC0494, VC0495, VC0496, VC0497, VC0498, VC0499, VC0501	0	0	0	0	0	0	28
Var3*	VC0491, VC0492, VC0493, VC0494, VC0495, VC0496, VC0497, VC0498, VC0501	0	0	0	0	0	0	8
Var3*	VC0491, VC0492, VC0493, VC0494, VC0495, VC0496, VC0497, VC0498, VC0499, VC0501, VC0516
Var3*	VC0491, VC0492, VC0493, VC0494, VC0495, VC0496, VC0497, VC0498, VC0499, VC0501, VC0513
Var3*	VC0491, VC0492, VC0493, VC0494, VC0495, VC0496, VC0497, VC0498, VC0499, VC0501, VC0512
Var3*	VC0491, VC0492, VC0493, VC0494, VC0495, VC0496, VC0497, VC0498, VC0499, VC0501, VC0502
Var-4	NC_002505.1_cds_WP_306461095.1_14, VC0495, VC0496, VC0497, VC0498, VC0499, VC0501, VC0502, VC0503, VC0504, VC0505, VC0506, VC0508, VC0509, VC0510, VC0512	0	16	46	25	138	94	0
Var4*	NC_002505.1_cds_WP_306461095.1_14, VC0495, VC0496, VC0497, VC0498, VC0499, VC0501, VC0502, VC0503, VC0504, VC0505, VC0506, VC0508, VC0509, VC0510, VC0512, VC0513	0	3	6	0	0	0	0
Var4*	NC_002505.1_cds_WP_306461095.1_14, VC0490, VC0495, VC0496, VC0497, VC0498, VC0499, VC0501, VC0502, VC0503, VC0504, VC0505, VC0506, VC0508, VC0509, VC0510, VC0512, VC0513, VC0514, VC0515
Var4*	NC_002505.1_cds_WP_306461095.1_14, VC0489, VC0495, VC0496, VC0497, VC0498, VC0499, VC0501, VC0502, VC0503, VC0504, VC0505, VC0506, VC0508, VC0509, VC0510, VC0512, VC0514
Var-5	NC_002505.1_cds_WP_306461095.1_14, VC0490, VC0491, VC0492, VC0493, VC0494, VC0495, VC0496, VC0497, VC0498, VC0499, VC0501, VC0502, VC0503, VC0504, VC0505, VC0506, VC0508, VC0509, VC0510, VC0512, VC0513, VC0514, VC0515, VC0516	0	0	0	0	0	0	1
Var6*	VC0491, VC0495, VC0496, VC0497, VC0498, VC0499, VC0513	0	0	0	0	0	0	13
Var6	VC0491, VC0495, VC0496, VC0497, VC0498, VC0499	0	0	0	0	0	0	10

## Sheet: Suppl Table 3
Supplementary Table 3 Estimated effect of climatic variables with cholera cases using GAM model
Smoothing func (Climatic Factors)	edf	Ref.df	Chi.sq	p-value
s(AvgT)	1.821	2.335	1.187	0.5594
s(Rainfall)	1.19	1.353	2.623	0.1081
s(RH)	5.527	6.681	33.438	1.35e-05
s(AvgT_lag)	5.739	6.947	77.003	<2.00E-16
s(Rainfall_lag)	2.119	2.69	8.982	0.0214
s(RH_lag)	4.793	5.903	12.374	0.0497
Here, AvgT refers weekly averaged temperature; Rainfall refers weekly total rainfall; RH refers weekly averaged relative humidity; AvgT_lag refers average temperture in the preceding week; Rainfall_lag refers total rainfall in the preceding week; RH_lag refers averaged relative humidity in the preceding week; and s() refers smoothing function capturing non-linearity.

## Sheet: Suppl Table 4
Supplementary Table 4. Modelling yearly cholera cases with climate and genomic evolutionary variables using negative binomial regression
Variables				Estimate	Std. Error	z value	Pr(>|z|)
(Intercept)				4.26045	0.632237	6.739	1.6e-11
N_weeks_temp_above_25ºC				0.007544	0.021164	0.356	0.7215
N_weeks_rain_above_100mm				0.050805	0.021823	2.328	0.0199
N_weeks_RH_between_68-77				0.035849	0.01835	1.954	0.0507
VC_typing1:Multi types				0.330345	0.164347	2.01	0.0444
VC_typing2:Changed proportion				0.560132	0.192423	2.911	0.0036
VC_typing2:Lineage added				0.36106	0.243525	1.483	0.1382
VC_typing2:Lineage dropped				0.198562	0.181232	1.096	0.2732
Likelihood ratio test aginst null model
Model	theta	Resid. df	2 x log-lik.	Test	df	LR stat.	Pr(Chi)
Null model (without cofactors)	3.99327	20	-277	Null vs Fitted	8	39.42	4.107e-06
Fitted model (with cofactors)	13.6175	12	-237.58
AIC
Model						df	AIC
Null model (without cofactors)						2	281
Fitted model (with cofactors)						9	255.58

## Sheet: Suppl Table 5
Supplementary Table 5. Lineage associated genetic variants
VARIANT TYPE	CHROM	POS	TYPE	REF	ALT	VARIENT	FTYPE	STRAND	NT_POS	AA_POS	EFFECT	LOCUS_TAG	GENE	PRODUCT	P_value	BD-0	BD-1	BD-1.1	BD-1.2	BD-1.2a	BD-1.2b	BD-2
Complex	NC_002505	890318	complex	CAC	ACAT	NC_002505_890318_complex_CAC_ACAT	.	.	.	.	.	.	.	.	0.00049975	0	0	0	100	100	100	0
	NC_002505	1237259	complex	CG	GC	NC_002505_1237259_complex_CG_GC	CDS	-	574/870	191/289	missense_variant c.573_574delCGinsGC p.HisGlu191GlnGln	VC_RS05710	.	DUF72 domain-containing protein	0.00049975	0	0	0	96	100	100	0
	NC_002505	1587146	complex	NNNN	GTCT	NC_002505_1587146_complex_NNNN_GTCT	CDS	+	436/1650	146/549	missense_variant c.436_439delAAAAinsGTCT p.??????146ValSer	VC_RS07170	.	Lon protease family protein	0.00949525	0	0	0	96	100	100	0
	NC_002506	980632	complex	CG	GC	NC_002506_980632_complex_CG_GC	CDS	+	438/1633	146/543	missense_variant c.438_439delCGinsGC p.HisGlu146GlnGln	VC_RS18205	.	methyl-accepting chemotaxis protein	0.0124938	0	0	0	96	100	100	0
	NC_002506	980511	complex	CG	GC	NC_002506_980511_complex_CG_GC	CDS	+	317/1633	106/543	missense_variant c.317_318delCGinsGC p.Thr106Ser	VC_RS18205	.	methyl-accepting chemotaxis protein	0.0349825	0	0	0	96	100	100	0
Deletion	NC_002505	876929	del	TA	T	NC_002505_876929_del_TA_T	.	.	.	.	.	.	.	.	0.00049975	83.3333	0	0	0	0	0	0
	NC_002505	1337745	del	GT	G	NC_002505_1337745_del_GT_G	.	.	.	.	.	.	.	.	0.00049975	0	0	100	0	0	0	0
	NC_002505	467110	del	CGACCCTAGACCCTAGACCCTAGACCCTA	C	NC_002505_467110_del_CGACCCTAGACCCTAGACCCTAGACCCTA_C	.	.	.	.	.	.	.	.	0.00049975	0	0	98.0769	0	0	0	0
	NC_002505	540849	del	TC	T	NC_002505_540849_del_TC_T	.	.	.	.	.	.	.	.	0.00049975	0	0	0	0	0	63.1579	0
	NC_002505	911354	del	GT	G	NC_002505_911354_del_GT_G	.	.	.	.	.	.	.	.	0.00049975	0	0	0	0	0	0	100
	NC_002505	1824680	del	GAGATGACT	G	NC_002505_1824680_del_GAGATGACT_G	.	.	.	.	.	.	.	.	0.00049975	0	0	0	0	0	0	95.5752
	NC_002505	532469	del	ATG	A	NC_002505_532469_del_ATG_A	.	.	.	.	.	.	.	.	0.00049975	0	0	0	0	0	0	51.3274
	NC_002506	1003187	del	TG	T	NC_002506_1003187_del_TG_T	.	.	.	.	.	.	.	.	0.00049975	0	0	0	100	100	100	0
	NC_002505	1993908	del	TA	T	NC_002505_1993908_del_TA_T	.	.	.	.	.	.	.	.	0.00049975	66.6667	85.7143	84.6154	100	100	100	2.65487
	NC_002505	2318559	del	AG	A	NC_002505_2318559_del_AG_A	.	.	.	.	.	.	.	.	0.00049975	66.6667	85.7143	82.6923	96	100	100	71.6814
	NC_002506	893323	del	GA	G	NC_002506_893323_del_GA_G	.	.	.	.	.	.	.	.	0.0114943	83.3333	100	100	100	100	100	99.115
	NC_002506	239068	del	TAAC	T	NC_002506_239068_del_TAAC_T	CDS	+	1483/2226	495/741	conservative_inframe_deletion c.1483_1485delAAC p.Asn495del	VC_RS14385	hlyA	cytolysin VCC	0.00049975	0	0	0	0	0	0	75.2212
	NC_002505	1778509	del	CGATAATCCA	C	NC_002505_1778509_del_CGATAATCCA_C	CDS	+	1749/2457	583/818	disruptive_inframe_deletion c.1749_1757delTAATCCAGA p.Asp583_Pro585del	VC_RS07985	.	M9 family metallopeptidase	0.00049975	0	0	100	0	0	0	0
	NC_002505	137105	del	TAACAGAAACAGAAACAGAAACAGAAACAGA	T	NC_002505_137105_del_TAACAGAAACAGAAACAGAAACAGAAACAGA_T	CDS	+	182/1176	61/391	disruptive_inframe_deletion c.182_211delAAACAGAAACAGAAACAGAAACAGAAACAG p.Glu61_Thr70del	VC_RS00675	ftsY	signal recognition particle-docking protein FtsY	0.00049975	0	0	98.0769	0	0	0	0
	NC_002506	604530	del	AGAACGAAGATTG	A	NC_002506_604530_del_AGAACGAAGATTG_A	CDS	-	583/1542	191/513	disruptive_inframe_deletion c.572_583delCAATCTTCGTTC p.Ala191_Leu195delinsVal	VC_RS16570	.	sodium:solute symporter	0.00049975	0	57.1429	82.6923	96	100	100	0
	NC_002506	765559	del	CG	C	NC_002506_765559_del_CG_C	CDS	+	1289/1348	430/448	frameshift_variant c.1289delG p.Gly430fs	VC_RS17245	.	magnesium transporter	0.00049975	66.6667	100	100	100	100	100	100
	NC_002505	1154205	del	GAACTATCTCCATAACA	G	NC_002505_1154205_del_GAACTATCTCCATAACA_G	CDS	+	1547/1611	516/536	frameshift_variant c.1547_1562delCAAACTATCTCCATAA p.Leu516fs	VC_RS05335	.	EAL domain-containing protein	0.00049975	0	0	0	0	0	0	100
	NC_002506	1050698	del	TTTGACCAG	T	NC_002506_1050698_del_TTTGACCAG_T	CDS	-	1742/2163	579/720	frameshift_variant c.1735_1742delCTGGTCAA p.Leu579fs	VC_RS18500	.	chemotaxis protein CheA	0.00049975	0	0	100	0	0	0	0
	NC_002506	53607	del	AT	A	NC_002506_53607_del_AT_A	CDS	+	1995/3121	665/1039	frameshift_variant c.1995delT p.Arg666fs	VC_RS13620	.	S41 family peptidase	0.00149925	83.3333	100	100	100	100	100	100
	NC_002506	472296	del	GA	G	NC_002506_472296_del_GA_G	CDS	-	199/676	67/224	frameshift_variant c.199delT p.Ser67fs	VC_RS15970	.	DedA family protein	0.00049975	83.3333	0	0	0	0	0	0
	NC_002505	903579	del	CA	C	NC_002505_903579_del_CA_C	CDS	+	209/771	70/256	frameshift_variant c.209delA p.Asn70fs	VC_RS04185	acfC	accessory colonization factor AcfC	0.00049975	0	100	100	100	100	100	0
	NC_002506	299079	del	GC	G	NC_002506_299079_del_GC_G	CDS	+	215/1133	72/376	frameshift_variant c.215delC p.Pro72fs	VC_RS14665	gcvT	glycine cleavage system aminomethyltransferase GcvT	0.00049975	66.6667	100	100	100	100	100	100
	NC_002505	1700367	del	CT	C	NC_002505_1700367_del_CT_C	CDS	+	315/786	105/261	frameshift_variant c.315delT p.Phe105fs	VC_RS07675	budA	acetolactate decarboxylase	0.00049975	83.3333	0	0	0	0	0	0
	NC_002505	524675	del	CT	C	NC_002505_524675_del_CT_C	CDS	-	442/1962	148/653	frameshift_variant c.442delA p.Arg148fs	VC_RS02500	.	DUF3732 domain-containing protein	0.00049975	0	0	0	0	0	0	78.7611
	NC_002505	2200070	del	TC	T	NC_002505_2200070_del_TC_T	CDS	-	487/921	163/306	frameshift_variant c.487delG p.Asp163fs	VC_RS09835	.	histone deacetylase	0.00049975	0	0	0	0	0	92.6316	0
	NC_002506	993699	del	CCT	C	NC_002506_993699_del_CCT_C	CDS	-	599/945	200/314	frameshift_variant c.598_599delAG p.Arg200fs	VC_RS18265	.	M23 family metallopeptidase	0.009995	83.3333	100	100	100	100	100	100
	NC_002505	1900853	del	AT	A	NC_002505_1900853_del_AT_A	CDS	-	606/3451	202/1149	frameshift_variant c.606delA p.Lys202fs	VC_RS08495	.	SNF2-related protein	0.00049975	83.3333	0	0	0	0	0	0
	NC_002506	993673	del	GC	G	NC_002506_993673_del_GC_G	CDS	-	625/945	209/314	frameshift_variant c.625delG p.Ala209fs	VC_RS18265	.	M23 family metallopeptidase	0.0009995	83.3333	100	100	100	100	100	100
	NC_002506	990917	del	GC	G	NC_002506_990917_del_GC_G	CDS	+	650/897	217/298	frameshift_variant c.650delC p.Pro217fs	VC_RS18250	.	amino acid ABC transporter permease	0.00049975	0	0	0	0	100	100	0
	NC_002506	238321	del	CATTCATCTGAATGATCA	C	NC_002506_238321_del_CATTCATCTGAATGATCA_C	CDS	+	734/2226	245/741	frameshift_variant c.734_750delTTCATCTGAATGATCAA p.Ile245fs	VC_RS14385	hlyA	cytolysin VCC	0.00049975	0	0	0	0	0	0	75.2212
	NC_002505	2551492	del	GA	G	NC_002505_2551492_del_GA_G	CDS	+	887/1623	296/540	frameshift_variant c.887delA p.Asn296fs	VC_RS11490	.	AAA family ATPase	0.00049975	0	0	0	0	0	0	77.8761
	NC_002506	144625	del	CA	C	NC_002506_144625_del_CA_C	CDS	+	978/981	326/326	frameshift_variant c.978delA p.Lys326fs	VC_RS13980	rbsC	ribose ABC transporter permease	0.00049975	83.3333	0	0	0	0	0	0
	NC_002506	690274	del	TA	T	NC_002506_690274_del_TA_T	CDS	-	322/856	108/284	frameshift_variant&stop_lost c.322delT p.Ter108fs	VC_RS16920	.	MIP/aquaporin family protein	0.027986	83.3333	95.2381	98.0769	100	100	100	100
Insertion	NC_002506	545435	ins	A	AC	NC_002506_545435_ins_A_AC	.	.	.	.	.	.	.	.	0.00049975	83.3333	0	0	0	0	0	0
	NC_002505	1933134	ins	A	AT	NC_002505_1933134_ins_A_AT	.	.	.	.	.	.	.	.	0.00049975	0	0	100	0	0	0	0
	NC_002506	345333	ins	A	AG	NC_002506_345333_ins_A_AG	.	.	.	.	.	.	.	.	0.00049975	0	0	100	0	0	0	0
	NC_002505	676136	ins	G	GT	NC_002505_676136_ins_G_GT	.	.	.	.	.	.	.	.	0.00049975	0	0	0	0	0	0	100
	NC_002505	906261	ins	A	AT	NC_002505_906261_ins_A_AT	.	.	.	.	.	.	.	.	0.00049975	0	0	0	0	0	0	95.5752
	NC_002505	888713	ins	A	AT	NC_002505_888713_ins_A_AT	.	.	.	.	.	.	.	.	0.00049975	0	0	0	60	100	100	0
	NC_002505	2558670	ins	T	TC	NC_002505_2558670_ins_T_TC	.	.	.	.	.	.	.	.	0.00049975	0	57.1429	94.2308	64	100	100	0
	NC_002505	906290	ins	T	TA	NC_002505_906290_ins_T_TA	.	.	.	.	.	.	.	.	0.00049975	0	100	98.0769	100	100	100	100
	NC_002505	890392	ins	T	TA	NC_002505_890392_ins_T_TA	.	.	.	.	.	.	.	.	0.00049975	0	61.9048	98.0769	100	100	98.9474	100
	NC_002505	2051792	ins	G	GC	NC_002505_2051792_ins_G_GC	.	.	.	.	.	.	.	.	0.00049975	66.6667	95.2381	100	100	100	100	100
	NC_002505	1530607	ins	T	TC	NC_002505_1530607_ins_T_TC	.	.	.	.	.	.	.	.	0.00049975	66.6667	95.2381	100	100	100	100	100
	NC_002505	2365247	ins	A	AG	NC_002505_2365247_ins_A_AG	.	.	.	.	.	.	.	.	0.00049975	66.6667	95.2381	100	100	100	100	100
	NC_002506	743255	ins	A	AG	NC_002506_743255_ins_A_AG	.	.	.	.	.	.	.	.	0.00049975	66.6667	95.2381	98.0769	100	99.2806	100	100
	NC_002506	184511	ins	G	GC	NC_002506_184511_ins_G_GC	.	.	.	.	.	.	.	.	0.00049975	66.6667	47.619	48.0769	32	49.6403	31.5789	34.5133
	NC_002505	1832841	ins	G	GCTTA	NC_002505_1832841_ins_G_GCTTA	.	.	.	.	.	.	.	.	0.0009995	83.3333	100	100	100	100	100	100
	NC_002505	807831	ins	A	AG	NC_002505_807831_ins_A_AG	.	.	.	.	.	.	.	.	0.015992	83.3333	95.2381	100	100	100	100	100
	NC_002505	741250	ins	A	ATGT	NC_002505_741250_ins_A_ATGT	CDS	-	356/714	119/237	disruptive_inframe_insertion c.354_356dupACA p.Gln118dup	VC_RS03495	btsR	two-component system response regulator BtsR	0.00049975	0	0	0	100	100	100	0
	NC_002505	359985	ins	C	CT	NC_002505_359985_ins_C_CT	CDS	-	1049/1164	350/387	frameshift_variant c.1049dupA p.Pro351fs	VC_RS01675	rsgA	small ribosomal subunit biogenesis GTPase RsgA	0.0154923	83.3333	95.2381	100	100	100	100	100
	NC_002505	881243	ins	C	CT	NC_002505_881243_ins_C_CT	CDS	+	1119/4601	373/1532	frameshift_variant c.1118dupT p.Leu373fs	VC_RS18785	.	hypothetical protein	0.00049975	83.3333	0	0	0	0	0	0
	NC_002505	2194677	ins	A	AG	NC_002505_2194677_ins_A_AG	CDS	-	1201/1215	401/404	frameshift_variant c.1201dupC p.Leu401fs	VC_RS09805	.	Hpt domain-containing protein	0.00049975	83.3333	0	0	0	0	0	0
	NC_002506	969851	ins	G	GT	NC_002506_969851_ins_G_GT	CDS	+	161/1991	54/662	frameshift_variant c.160dupT p.Tyr54fs	VC_RS18165	.	flavohemoglobin expression-modulating QEGLA motif protein	0.013993	83.3333	100	98.0769	100	100	100	100
	NC_002506	255373	ins	T	TG	NC_002506_255373_ins_T_TG	CDS	+	1762/1979	588/658	frameshift_variant c.1761dupG p.Leu588fs	VC_RS14445	vctA	TonB-dependent iron chelate receptor VctA	0.00049975	83.3333	0	0	0	0	0	0
	NC_002505	1625932	ins	A	AC	NC_002505_1625932_ins_A_AC	CDS	-	1894/2855	632/950	frameshift_variant c.1894dupG p.Val632fs	VC_RS07315	.	formate dehydrogenase subunit alpha	0.00049975	83.3333	4.7619	0	0	0	0	99.115
	NC_002505	612958	ins	G	GA	NC_002505_612958_ins_G_GA	CDS	-	218/611	73/202	frameshift_variant c.218dupT p.Val74fs	VC_RS02975	hapR	quorum-sensing master transcriptional regulator HapR	0.0374813	100	90.4762	100	100	98.5612	100	100
	NC_002506	279449	ins	G	GC	NC_002506_279449_ins_G_GC	CDS	-	307/509	103/168	frameshift_variant c.307dupG p.Ala103fs	VC_RS14570	.	cupredoxin family protein	0.0129935	83.3333	100	98.0769	100	100	100	100
	NC_002506	1062458	ins	A	AG	NC_002506_1062458_ins_A_AG	CDS	-	344/632	115/209	frameshift_variant c.344_345insC p.Pro116fs	VC_RS18550	.	tetratricopeptide repeat protein	0.0164918	83.3333	95.2381	100	100	100	100	100
	NC_002505	1389483	ins	G	GC	NC_002505_1389483_ins_G_GC	CDS	+	644/1019	215/338	frameshift_variant c.643dupC p.His215fs	VC_RS06370	.	YcjF family protein	0.00049975	83.3333	71.4286	44.2308	52	38.8489	35.7895	34.5133
	NC_002505	200922	ins	G	GA	NC_002505_200922_ins_G_GA	CDS	-	681/843	227/280	frameshift_variant c.681dupT p.Gln228fs	VC_RS00955	rarD	EamA family transporter RarD	0.00049975	0	0	0	0	100	100	0
	NC_002506	686743	ins	G	GC	NC_002506_686743_ins_G_GC	CDS	-	98/197	33/64	frameshift_variant c.98_99insG p.His33fs	VC_RS16900	.	hypothetical protein	0.0354823	83.3333	95.2381	98.0769	100	100	100	100
Multiple Nucleotide polymorphisom	NC_002505	2122955	mnp	NN	GC	NC_002505_2122955_mnp_NN_GC	CDS	-	331/1431	110/476	missense_variant c.330_331delTTinsGC p.??????110TrpLeu	VC_RS09485	menE	o-succinylbenzoate--CoA ligase	0.00049975	0	0	0	100	100	100	0
	NC_002505	1237259	mnp	CG	GC	NC_002505_1237259_mnp_CG_GC	CDS	-	574/870	191/289	missense_variant c.573_574delCGinsGC p.HisGlu191GlnGln	VC_RS05710	.	DUF72 domain-containing protein	0.0009995	0	0	0	100	100	100	0
	NC_002505	1587146	mnp	NNNN	GTCT	NC_002505_1587146_mnp_NNNN_GTCT	CDS	+	436/1650	146/549	missense_variant c.436_439delAAAAinsGTCT p.??????146ValSer	VC_RS07170	.	Lon protease family protein	0.001999	0	0	0	100	100	100	0
	NC_002506	980632	mnp	CG	GC	NC_002506_980632_mnp_CG_GC	CDS	+	438/1633	146/543	missense_variant c.438_439delCGinsGC p.HisGlu146GlnGln	VC_RS18205	.	methyl-accepting chemotaxis protein	0.00849575	0	0	0	100	100	100	0
	NC_002506	980511	mnp	CG	GC	NC_002506_980511_mnp_CG_GC	CDS	+	317/1633	106/543	missense_variant c.317_318delCGinsGC p.Thr106Ser	VC_RS18205	.	methyl-accepting chemotaxis protein	0.023988	0	0	0	100	100	100	0
	NC_002506	566512	mnp	CG	GC	NC_002506_566512_mnp_CG_GC	CDS	-	767/1041	256/346	missense_variant c.766_767delCGinsGC p.Arg256Ala	VC_RS16390	.	AbrB family transcriptional regulator	0.0424788	0	0	0	96	100	100	0
Single Nucleotide polymorphisom	NC_002506	345470	snp	A	G	NC_002506_345470_snp_A_G	.	.	.	.	.	.	.	.	0.00049975	0	0	100	0	0	0	0
	NC_002505	1549116	snp	G	A	NC_002505_1549116_snp_G_A	.	.	.	.	.	.	.	.	0.00049975	0	0	100	0	0	0	0
	NC_002505	2317938	snp	C	T	NC_002505_2317938_snp_C_T	.	.	.	.	.	.	.	.	0.00049975	0	0	0	0	0	92.6316	0
	NC_002506	343197	snp	C	T	NC_002506_343197_snp_C_T	.	.	.	.	.	.	.	.	0.00049975	0	0	0	0	0	0	100
	NC_002505	2094595	snp	C	T	NC_002505_2094595_snp_C_T	.	.	.	.	.	.	.	.	0.00049975	0	0	0	0	0	0	100
	NC_002505	1317870	snp	G	C	NC_002505_1317870_snp_G_C	.	.	.	.	.	.	.	.	0.00049975	0	0	0	0	0	0	100
	NC_002505	1878672	snp	G	A	NC_002505_1878672_snp_G_A	.	.	.	.	.	.	.	.	0.00049975	0	0	0	0	0	0	83.1858
	NC_002506	306422	snp	G	A	NC_002506_306422_snp_G_A	.	.	.	.	.	.	.	.	0.00049975	0	0	0	0	0	0	82.3009
	NC_002505	2698225	snp	C	T	NC_002505_2698225_snp_C_T	.	.	.	.	.	.	.	.	0.00049975	0	0	0	0	0	0	77.8761
	NC_002505	1566836	snp	C	A	NC_002505_1566836_snp_C_A	.	.	.	.	.	.	.	.	0.00049975	0	0	0	0	0	0	75.2212
	NC_002506	62339	snp	G	A	NC_002506_62339_snp_G_A	.	.	.	.	.	.	.	.	0.00049975	0	0	0	0	0	0	71.6814
	NC_002506	333886	snp	A	G	NC_002506_333886_snp_A_G	.	.	.	.	.	.	.	.	0.00049975	0	0	0	0	0	0	58.4071
	NC_002505	940510	snp	A	T	NC_002505_940510_snp_A_T	.	.	.	.	.	.	.	.	0.00049975	0	0	0	100	100	100	0
	NC_002506	432458	snp	G	C	NC_002506_432458_snp_G_C	.	.	.	.	.	.	.	.	0.00049975	0	0	0	100	100	100	0
	NC_002506	343099	snp	C	T	NC_002506_343099_snp_C_T	.	.	.	.	.	.	.	.	0.00049975	0	0	0	96	100	100	0
	NC_002505	1812498	snp	C	T	NC_002505_1812498_snp_C_T	.	.	.	.	.	.	.	.	0.00049975	0	0	0	60	100	100	0
	NC_002506	704891	snp	G	A	NC_002506_704891_snp_G_A	.	.	.	.	.	.	.	.	0.00049975	0	95.2381	100	100	100	100	0
	NC_002506	203369	snp	G	T	NC_002506_203369_snp_G_T	.	.	.	.	.	.	.	.	0.00049975	0	95.2381	100	100	100	100	0
	NC_002505	2669927	snp	G	T	NC_002505_2669927_snp_G_T	.	.	.	.	.	.	.	.	0.00049975	0	100	100	100	100	100	100
	NC_002506	356433	snp	N	T	NC_002506_356433_snp_N_T	.	.	.	.	.	.	.	.	0.00049975	0	100	98.0769	100	100	100	100
	NC_002505	967866	snp	A	G	NC_002505_967866_snp_A_G	.	.	.	.	.	.	.	.	0.00049975	0	85.7143	98.0769	100	100	100	100
	NC_002505	454734	snp	G	A	NC_002505_454734_snp_G_A	.	.	.	.	.	.	.	.	0.00049975	0	61.9048	98.0769	100	100	100	99.115
	NC_002505	799723	snp	C	T	NC_002505_799723_snp_C_T	.	.	.	.	.	.	.	.	0.00049975	50	61.9048	59.6154	60	76.9784	87.3684	62.8319
	NC_002505	1418798	snp	G	T	NC_002505_1418798_snp_G_T	.	.	.	.	.	.	.	.	0.00049975	16.6667	95.2381	98.0769	100	100	100	100
	NC_002505	858661	snp	T	A	NC_002505_858661_snp_T_A	.	.	.	.	.	.	.	.	0.00149925	83.3333	100	100	100	100	100	100
	NC_002505	1441233	snp	G	A	NC_002505_1441233_snp_G_A	.	.	.	.	.	.	.	.	0.003998	83.3333	100	100	100	100	100	100
	NC_002505	818025	snp	G	A	NC_002505_818025_snp_G_A	.	.	.	.	.	.	.	.	0.007996	83.3333	100	100	100	100	100	100
	NC_002506	788542	snp	G	T	NC_002506_788542_snp_G_T	.	.	.	.	.	.	.	.	0.009995	83.3333	100	100	100	100	100	100
	NC_002505	1670764	snp	N	T	NC_002505_1670764_snp_N_T	.	.	.	.	.	.	.	.	0.0129935	83.3333	100	98.0769	100	100	100	100
	NC_002505	1111283	snp	G	T	NC_002505_1111283_snp_G_T	.	.	.	.	.	.	.	.	0.0164918	83.3333	95.2381	100	100	100	100	99.115
	NC_002505	167458	snp	N	G	NC_002505_167458_snp_N_G	tRNA	+	.	.	intragenic_variant n.167458A>G	VC_RS00810	.	tRNA-Pro	0.00049975	0	100	100	100	100	100	0
	NC_002505	2332052	snp	T	C	NC_002505_2332052_snp_T_C	tRNA	+	.	.	intragenic_variant n.2332052T>C	VC_RS10545	.	tRNA-Met	0.00049975	0	57.1429	100	100	100	98.9474	0
	NC_002505	581125	snp	T	G	NC_002505_581125_snp_T_G	tRNA	+	.	.	intragenic_variant n.581125T>G	VC_RS02785	.	tRNA-Arg	0.00049975	66.6667	90.4762	100	100	100	100	100
	NC_002505	683129	snp	G	C	NC_002505_683129_snp_G_C	tRNA	+	.	.	intragenic_variant n.683129G>C	VC_RS03245	.	tRNA-Met	0.00049975	0	85.7143	100	100	100	100	100
	NC_002505	2098531	snp	C	A	NC_002505_2098531_snp_C_A	CDS	+	100/1827	34/608	missense_variant c.100C>A p.His34Asn	VC_RS09385	.	L-tyrosine/L-tryptophan isonitrile synthase family protein	0.00049975	0	76.1905	100	100	100	100	98.2301
	NC_002506	487649	snp	C	T	NC_002506_487649_snp_C_T	CDS	+	1013/1083	338/360	missense_variant c.1013C>T p.Ala338Val	VC_RS16040	.	site-2 protease family protein	0.00049975	0	0	0	0	0	0	100
	NC_002505	2191730	snp	A	G	NC_002505_2191730_snp_A_G	CDS	-	1040/1113	347/370	missense_variant c.1040T>C p.Val347Ala	VC_RS09795	asd	aspartate-semialdehyde dehydrogenase	0.00049975	0	0	0	60	76.259	80	0.884956
	NC_002506	1030586	snp	C	A	NC_002506_1030586_snp_C_A	CDS	+	1044/1818	348/605	missense_variant c.1044C>A p.Asn348Lys	VC_RS18415	.	SUMF1/EgtB/PvdO family nonheme iron enzyme	0.00049975	0	0	0	0	0	0	98.2301
	NC_002505	368119	snp	T	C	NC_002505_368119_snp_T_C	CDS	+	1048/1962	350/653	missense_variant c.1048T>C p.Cys350Arg	VC_RS01740	mutL	DNA mismatch repair endonuclease MutL	0.00049975	66.6667	0	0	0	0	0	0
	NC_002506	266019	snp	A	G	NC_002506_266019_snp_A_G	CDS	-	1061/1761	354/586	missense_variant c.1061T>C p.Ile354Thr	VC_RS14510	.	PTS ascorbate-specific subunit IIBC	0.00049975	0	0	0	0	0	89.4737	0
	NC_002506	143762	snp	G	A	NC_002506_143762_snp_G_A	CDS	+	109/981	37/326	missense_variant c.109G>A p.Val37Ile	VC_RS13980	rbsC	ribose ABC transporter permease	0.00049975	0	100	100	100	100	100	100
	NC_002506	366180	snp	N	C	NC_002506_366180_snp_N_C	CDS	+	10/510	4/169	missense_variant c.10A>C p.???4Arg	VC_RS15240	.	GNAT family N-acetyltransferase	0.0109945	83.3333	100	100	100	100	100	100
	NC_002505	2547714	snp	C	T	NC_002505_2547714_snp_C_T	CDS	+	110/861	37/286	missense_variant c.110C>T p.Ala37Val	VC_RS11475	.	LysR family transcriptional regulator	0.00049975	66.6667	95.2381	96.1538	100	100	100	2.65487
	NC_002505	1452755	snp	T	C	NC_002505_1452755_snp_T_C	CDS	+	113/939	38/312	missense_variant c.113T>C p.Val38Ala	VC_RS06620	.	bifunctional precorrin-2 dehydrogenase/sirohydrochlorin ferrochelatase	0.00049975	0	0	0	0	86.3309	0	0
	NC_002505	1567227	snp	A	G	NC_002505_1567227_snp_A_G	CDS	-	115/375	39/124	missense_variant c.115T>C p.Tyr39His	VC_RS07050	ctxB	cholera enterotoxin binding subunit CtxB	0.001999	83.3333	0	0	0	0	0	0
	NC_002505	673206	snp	A	G	NC_002505_673206_snp_A_G	CDS	+	1177/1188	393/395	missense_variant c.1177A>G p.Thr393Ala	VC_RS03190	tyrS	tyrosine--tRNA ligase	0.00049975	0	0	0	0	0	0	97.3451
	NC_002505	2849590	snp	C	T	NC_002505_2849590_snp_C_T	CDS	+	1255/1278	419/425	missense_variant c.1255C>T p.Pro419Ser	VC_RS12910	.	malic enzyme-like NAD(P)-binding protein	0.00049975	0	0	0	96	100	100	0
	NC_002505	432680	snp	G	A	NC_002505_432680_snp_G_A	CDS	+	1307/1728	436/575	missense_variant c.1307G>A p.Gly436Asp	VC_RS02050	.	GspE/PulE family protein	0.00049975	50	100	100	100	100	100	100
	NC_002505	1388812	snp	C	T	NC_002505_1388812_snp_C_T	CDS	+	1340/1374	447/457	missense_variant c.1340C>T p.Ala447Val	VC_RS06365	.	YcjX family protein	0.00049975	0	57.1429	100	100	100	100	0
	NC_002505	1696645	snp	N	C	NC_002505_1696645_snp_N_C	CDS	-	1366/1512	456/503	missense_variant c.1366T>G p.???456Ala	VC_RS07660	.	catalase	0.0134933	83.3333	100	98.0769	100	100	100	100
	NC_002505	1696639	snp	N	C	NC_002505_1696639_snp_N_C	CDS	-	1372/1512	458/503	missense_variant c.1372T>G p.???458Asp	VC_RS07660	.	catalase	0.00049975	66.6667	100	100	100	100	100	100
	NC_002505	1882714	snp	G	A	NC_002505_1882714_snp_G_A	CDS	+	143/825	48/274	missense_variant c.143G>A p.Ser48Asn	VC_RS08435	.	hypothetical protein	0.00049975	0	80.9524	100	100	100	100	0
	NC_002505	2405951	snp	A	C	NC_002505_2405951_snp_A_C	CDS	-	146/510	49/169	missense_variant c.146T>G p.Leu49Trp	VC_RS10875	.	OmpH family outer membrane protein	0.00049975	0	76.1905	92.3077	96	98.5612	82.1053	90.2655
	NC_002505	2577786	snp	C	T	NC_002505_2577786_snp_C_T	CDS	-	1472/1743	491/580	missense_variant c.1472G>A p.Arg491His	VC_RS11595	.	penicillin-binding protein 3	0.00049975	0	61.9048	100	100	100	100	0
	NC_002505	1622584	snp	G	A	NC_002505_1622584_snp_G_A	CDS	-	149/741	50/246	missense_variant c.149C>T p.Pro50Leu	VC_RS07295	cobB	Sir2 family NAD+-dependent deacetylase	0.00049975	0	0	0	0	86.3309	0	0
	NC_002505	2240207	snp	C	T	NC_002505_2240207_snp_C_T	CDS	-	154/3345	52/1114	missense_variant c.154G>A p.Gly52Arg	VC_RS10015	.	AraC family transcriptional regulator	0.00049975	0	0	0	44	69.0647	85.2632	0.884956
	NC_002505	175358	snp	C	A	NC_002505_175358_snp_C_A	CDS	-	1575/1590	525/529	missense_variant c.1575G>T p.Glu525Asp	VC_RS00855	.	anti-phage dCTP deaminase	0.00049975	0	0	88.4615	0	0	0	0
	NC_002505	2021722	snp	C	A	NC_002505_2021722_snp_C_A	CDS	-	157/1008	53/335	missense_variant c.157G>T p.Val53Phe	VC_RS09060	lpxK	tetraacyldisaccharide 4'-kinase	0.0124938	83.3333	100	100	100	100	100	99.115
	NC_002506	1018931	snp	C	T	NC_002506_1018931_snp_C_T	CDS	-	1585/1890	529/629	missense_variant c.1585G>A p.Ala529Thr	VC_RS18380	.	methyl-accepting chemotaxis protein	0.00049975	0	0	0	0	0	0	99.115
	NC_002506	609892	snp	G	A	NC_002506_609892_snp_G_A	CDS	-	1594/1689	532/562	missense_variant c.1594C>T p.Arg532Cys	VC_RS16595	narQ	nitrate/nitrite two-component system sensor histidine kinase NarQ	0.00049975	0	0	0	0	100	100	0
	NC_002506	273825	snp	C	A	NC_002506_273825_snp_C_A	CDS	-	1597/2234	533/743	missense_variant c.1597G>T p.Asp533Tyr	VC_RS14545	.	glycoside hydrolase	0.00049975	0	0	0	0	0	0	100
	NC_002505	246688	snp	C	T	NC_002505_246688_snp_C_T	CDS	+	160/1398	54/465	missense_variant c.160C>T p.Pro54Ser	VC_RS01180	.	mannose-1-phosphate guanylyltransferase/mannose-6-phosphate isomerase	0.00049975	0	0	0	0	0	0	100
	NC_002505	1739750	snp	C	T	NC_002505_1739750_snp_C_T	CDS	-	1618/8472	540/2823	missense_variant c.1618G>A p.Val540Ile	VC_RS19125	.	cadherin domain-containing protein	0.00049975	16.6667	66.6667	98.0769	100	100	100	100
	NC_002505	1004079	snp	G	A	NC_002505_1004079_snp_G_A	CDS	+	1618/2214	540/737	missense_variant c.1618G>A p.Val540Met	VC_RS04650	vpsO	exopolysaccharide regulatory tyrosine autokinase VpsO	0.00049975	0	0	100	100	100	100	0
	NC_002505	1117838	snp	T	G	NC_002505_1117838_snp_T_G	CDS	+	1637/2127	546/708	missense_variant c.1637T>G p.Val546Gly	VC_RS05150	fadJ	fatty acid oxidation complex subunit alpha FadJ	0.00049975	0	0	0	60	100	100	0
	NC_002505	1359179	snp	G	A	NC_002505_1359179_snp_G_A	CDS	+	166/1323	56/440	missense_variant c.166G>A p.Ala56Thr	VC_RS06265	.	6-phospho-beta-glucosidase	0.00049975	33.3333	19.0476	50	68	47.482	67.3684	50.4425
	NC_002506	562858	snp	A	T	NC_002506_562858_snp_A_T	CDS	+	16/513	6/170	missense_variant c.16A>T p.Thr6Ser	VC_RS16380	.	RNA methyltransferase	0.00049975	0	0	0	0	0	0	100
	NC_002505	748556	snp	C	T	NC_002505_748556_snp_C_T	CDS	+	172/1947	58/648	missense_variant c.172C>T p.Arg58Cys	VC_RS03525	sltY	murein transglycosylase	0.00049975	0	0	0	0	0	0	100
	NC_002505	2873743	snp	C	T	NC_002505_2873743_snp_C_T	CDS	+	1748/1803	583/600	missense_variant c.1748C>T p.Thr583Ile	VC_RS13005	.	protein-disulfide reductase DsbD	0.00049975	0	61.9048	100	100	100	100	0
	NC_002505	2690493	snp	G	A	NC_002505_2690493_snp_G_A	CDS	+	1796/2862	599/953	missense_variant c.1796G>A p.Arg599His	VC_RS12085	.	valine--tRNA ligase	0.00049975	0	95.2381	100	100	100	100	0
	NC_002506	1024884	snp	G	A	NC_002506_1024884_snp_G_A	CDS	-	1799/3120	600/1039	missense_variant c.1799C>T p.Ala600Val	VC_RS18400	putA	bifunctional proline dehydrogenase/L-glutamate gamma-semialdehyde dehydrogenase PutA	0.00049975	0	0	0	0	0	82.1053	0
	NC_002506	1004685	snp	T	G	NC_002506_1004685_snp_T_G	CDS	+	185/891	62/296	missense_variant c.185T>G p.Val62Gly	VC_RS18320	.	LysR family transcriptional regulator	0.0009995	83.3333	100	100	100	100	100	100
	NC_002506	754794	snp	C	T	NC_002506_754794_snp_C_T	CDS	-	193/1551	65/516	missense_variant c.193G>A p.Ala65Thr	VC_RS17210	.	cryptochrome/photolyase family protein	0.00049975	0	0	100	0	0	0	0
	NC_002505	2682978	snp	N	G	NC_002505_2682978_snp_N_G	CDS	-	196/1254	66/417	missense_variant c.196T>C p.???66Pro	VC_RS12050	.	HD-GYP domain-containing protein	0.0154923	83.3333	95.2381	100	100	100	100	100
	NC_002505	1332186	snp	T	G	NC_002505_1332186_snp_T_G	CDS	+	1980/2685	660/894	missense_variant c.1980T>G p.Asp660Glu	VC_RS06140	gyrA	DNA topoisomerase (ATP-hydrolyzing) subunit A	0.00049975	0	0	0	0	0	0	100
	NC_002505	2466598	snp	T	C	NC_002505_2466598_snp_T_C	CDS	-	2039/2121	680/706	missense_variant c.2039A>G p.Tyr680Cys	VC_RS11185	recD	exodeoxyribonuclease V subunit alpha	0.00049975	0	61.9048	100	100	100	100	0
	NC_002505	1567139	snp	A	G	NC_002505_1567139_snp_A_G	CDS	-	203/375	68/124	missense_variant c.203T>C p.Ile68Thr	VC_RS07050	ctxB	cholera enterotoxin binding subunit CtxB	0.00049975	66.6667	100	100	100	100	100	100
	NC_002505	745965	snp	C	T	NC_002505_745965_snp_C_T	CDS	-	221/372	74/123	missense_variant c.221G>A p.Ser74Asn	VC_RS03515	.	PilZ domain-containing protein	0.00049975	0	4.7619	0	96	98.5612	30.5263	0
	NC_002506	639691	snp	T	C	NC_002506_639691_snp_T_C	CDS	-	2293/3156	765/1051	missense_variant c.2293A>G p.Ile765Val	VC_RS16715	.	chitinase C-terminal domain-containing protein	0.00049975	0	100	100	100	100	100	100
	NC_002505	1212691	snp	A	T	NC_002505_1212691_snp_A_T	CDS	+	22/321	8/106	missense_variant c.22A>T p.Ile8Phe	VC_RS05605	clpS	ATP-dependent Clp protease adapter ClpS	0.00049975	0	0	100	100	100	100	0
	NC_002506	804158	snp	C	T	NC_002506_804158_snp_C_T	CDS	-	233/1245	78/414	missense_variant c.233G>A p.Arg78His	VC_RS17390	.	hypothetical protein	0.001999	83.3333	100	100	100	100	100	100
	NC_002505	628646	snp	C	T	NC_002505_628646_snp_C_T	CDS	+	2345/2463	782/820	missense_variant c.2345C>T p.Ala782Val	VC_RS03045	hrpB	ATP-dependent helicase HrpB	0.00049975	0	0	0	0	0	0	97.3451
	NC_002505	1782501	snp	G	A	NC_002505_1782501_snp_G_A	CDS	-	235/1755	79/584	missense_variant c.235C>T p.Leu79Phe	VC_RS07995	vieA	two-component system response regulator VieA	0.00049975	16.6667	33.3333	51.9231	44	53.9568	64.2105	58.4071
	NC_002505	1330454	snp	G	T	NC_002505_1330454_snp_G_T	CDS	+	248/2685	83/894	missense_variant c.248G>T p.Ser83Ile	VC_RS06140	gyrA	DNA topoisomerase (ATP-hydrolyzing) subunit A	0.00049975	33.3333	52.381	51.9231	68	50.3597	68.4211	65.4867
	NC_002505	2605341	snp	G	A	NC_002505_2605341_snp_G_A	CDS	-	254/2286	85/761	missense_variant c.254C>T p.Ser85Leu	VC_RS11705	parC	DNA topoisomerase IV subunit A	0.00049975	0	100	98.0769	100	100	100	100
	NC_002505	1404113	snp	C	T	NC_002505_1404113_snp_C_T	CDS	-	265/705	89/234	missense_variant c.265G>A p.Asp89Asn	VC_RS06435	carR	response regulator transcription factor CarR	0.00049975	0	80.9524	100	100	100	100	0
	NC_002505	890714	snp	A	G	NC_002505_890714_snp_A_G	CDS	+	266/675	89/224	missense_variant c.266A>G p.Asn89Ser	VC_RS04120	tcpA	toxin-coregulated pilus major pilin TcpA	0.00049975	33.3333	90.4762	100	100	100	100	100
	NC_002505	148860	snp	C	T	NC_002505_148860_snp_C_T	CDS	-	26/1608	9/535	missense_variant c.26G>A p.Cys9Tyr	VC_RS00720	.	S8 family peptidase	0.00049975	0	95.2381	98.0769	100	100	100	0
	NC_002505	2476906	snp	G	A	NC_002505_2476906_snp_G_A	CDS	-	272/969	91/322	missense_variant c.272C>T p.Ala91Val	VC_RS11200	.	TDT family transporter	0.00049975	0	0	0	40	90.6475	90.5263	0
	NC_002505	497577	snp	G	A	NC_002505_497577_snp_G_A	CDS	-	278/957	93/318	missense_variant c.278C>T p.Thr93Ile	VC_RS02400	gshB	glutathione synthase	0.00049975	0	9.52381	100	100	100	100	0
	NC_002505	263830	snp	T	C	NC_002505_263830_snp_T_C	CDS	+	283/672	95/223	missense_variant c.283T>C p.Ser95Pro	VC_RS01260	.	FkbM family methyltransferase	0.00049975	0	0	0	0	0	0	95.5752
	NC_002505	1693044	snp	G	A	NC_002505_1693044_snp_G_A	CDS	+	292/2517	98/838	missense_variant c.292G>A p.Asp98Asn	VC_RS07645	.	YbcC family protein	0.00049975	0	0	0	0	86.3309	0	0
	NC_002505	1068347	snp	G	A	NC_002505_1068347_snp_G_A	CDS	+	3058/4554	1020/1517	missense_variant c.3058G>A p.Ala1020Thr	VC_RS04925	hubP	polar hub landmark protein HubP	0.00049975	0	57.1429	100	100	100	100	100
	NC_002505	991447	snp	A	G	NC_002505_991447_snp_A_G	CDS	+	307/792	103/263	missense_variant c.307A>G p.Met103Val	VC_RS04610	.	hypothetical protein	0.00049975	0	0	0	0	100	100	0
	NC_002506	460594	snp	C	T	NC_002506_460594_snp_C_T	CDS	-	311/1407	104/468	missense_variant c.311G>A p.Gly104Glu	VC_RS15930	clcA	H(+)/Cl(-) exchange transporter ClcA	0.00049975	0	61.9048	100	100	100	100	0
	NC_002505	1198262	snp	C	T	NC_002505_1198262_snp_C_T	CDS	-	313/408	105/135	missense_variant c.313G>A p.Gly105Ser	VC_RS05540	.	H-NS family nucleoid-associated regulatory protein	0.00049975	33.3333	66.6667	50	32	52.518	32.6316	49.5575
	NC_002506	568477	snp	C	T	NC_002506_568477_snp_C_T	CDS	-	317/516	106/171	missense_variant c.317G>A p.Arg106His	VC_RS16400	.	GNAT family N-acetyltransferase	0.00049975	0	0	0	4	0.719424	0	86.7257
	NC_002505	2609364	snp	C	A	NC_002505_2609364_snp_C_A	CDS	-	322/447	108/148	missense_variant c.322G>T p.Asp108Tyr	VC_RS11725	.	DUF1249 family protein	0.00049975	0	0	0	0	0	90.5263	0
	NC_002505	2609994	snp	G	A	NC_002505_2609994_snp_G_A	CDS	-	325/627	109/208	missense_variant c.325C>T p.Arg109Cys	VC_RS11730	nudF	ADP-ribose diphosphatase	0.00049975	0	0	0	0	0	0	100
	NC_002505	276112	snp	G	A	NC_002505_276112_snp_G_A	CDS	+	346/888	116/295	missense_variant c.346G>A p.Gly116Arg	VC_RS01315	.	ROK family protein	0.00049975	66.6667	0	0	0	0	0	0
	NC_002506	577065	snp	C	A	NC_002506_577065_snp_C_A	CDS	-	361/459	121/152	missense_variant c.361G>T p.Ala121Ser	VC_RS16445	.	YeeE/YedE family protein	0.00049975	0	61.9048	100	100	100	100	0
	NC_002505	891580	snp	T	G	NC_002505_891580_snp_T_G	CDS	+	378/1293	126/430	missense_variant c.378T>G p.Phe126Leu	VC_RS04125	tcpB	toxin-coregulated pilus minor pilin TcpB	0.00049975	0	0	0	0	0	0	100
	NC_002505	1641056	snp	G	A	NC_002505_1641056_snp_G_A	CDS	+	379/612	127/203	missense_variant c.379G>A p.Glu127Lys	VC_RS07380	mobA	molybdenum cofactor guanylyltransferase MobA	0.00049975	16.6667	90.4762	100	100	100	100	100
	NC_002506	1063939	snp	G	T	NC_002506_1063939_snp_G_T	CDS	-	382/684	128/227	missense_variant c.382C>A p.Arg128Ser	VC_RS18560	.	TenA family transcriptional regulator	0.00049975	0	100	100	100	100	100	100
	NC_002505	1354024	snp	G	A	NC_002505_1354024_snp_G_A	CDS	+	406/1605	136/534	missense_variant c.406G>A p.Ala136Thr	VC_RS06240	.	BCCT family transporter	0.00049975	0	0	0	60	100	100	0
	NC_002506	796722	snp	C	T	NC_002506_796722_snp_C_T	CDS	-	4099/9792	1367/3263	missense_variant c.4099G>A p.Ala1367Thr	VC_RS17375	.	retention module-containing protein	0.00049975	0	0	0	0	0	0	100
	NC_002505	149686	snp	G	T	NC_002505_149686_snp_G_T	CDS	+	409/798	137/265	missense_variant c.409G>T p.Ala137Ser	VC_RS00725	murI	glutamate racemase	0.00049975	0	0	0	0	0	0	100
	NC_002506	728025	snp	C	A	NC_002506_728025_snp_C_A	CDS	+	446/1209	149/402	missense_variant c.446C>A p.Pro149His	VC_RS17100	fabV	enoyl-ACP reductase FabV	0.00049975	0	0	0	0	0	69.4737	0
	NC_002505	2483236	snp	G	A	NC_002505_2483236_snp_G_A	CDS	+	448/1452	150/483	missense_variant c.448G>A p.Ala150Thr	VC_RS11230	.	RimK family protein	0.00049975	0	100	98.0769	100	100	100	100
	NC_002505	1060408	snp	C	T	NC_002505_1060408_snp_C_T	CDS	-	448/1137	150/378	missense_variant c.448G>A p.Asp150Asn	VC_RS04910	nagA	N-acetylglucosamine-6-phosphate deacetylase	0.00049975	33.3333	90.4762	94.2308	100	100	98.9474	98.2301
	NC_002506	733358	snp	C	T	NC_002506_733358_snp_C_T	CDS	-	45/630	15/209	missense_variant c.45G>A p.Met15Ile	VC_RS17115	.	DNA-J related domain-containing protein	0.00049975	0	0	100	100	99.2806	100	0
	NC_002505	2485904	snp	G	A	NC_002505_2485904_snp_G_A	CDS	+	472/552	158/183	missense_variant c.472G>A p.Ala158Thr	VC_RS11240	.	gamma-glutamylcyclotransferase family protein	0.00049975	0	0	0	0	0	0	100
	NC_002506	921045	snp	A	C	NC_002506_921045_snp_A_C	CDS	-	482/1629	161/542	missense_variant c.482T>G p.Ile161Ser	VC_RS17940	.	methyl-accepting chemotaxis protein	0.00049975	0	0	0	0	0	89.4737	0
	NC_002505	2394036	snp	T	C	NC_002505_2394036_snp_T_C	CDS	-	485/525	162/174	missense_variant c.485A>G p.Tyr162Cys	VC_RS10825	.	phenolic acid decarboxylase	0.00049975	0	0	0	100	100	100	0
	NC_002505	831779	snp	C	A	NC_002505_831779_snp_C_A	CDS	-	514/1317	172/438	missense_variant c.514G>T p.Ala172Ser	VC_RS03885	vibH	norspermidine-2,3-dihydroxybenzoate synthase VibH	0.00049975	0	0	0	60	100	100	0
	NC_002506	968585	snp	G	A	NC_002506_968585_snp_G_A	CDS	-	521/885	174/294	missense_variant c.521C>T p.Ala174Val	VC_RS18155	.	LysR family transcriptional regulator	0.00049975	0	23.8095	0	60	100	100	15.9292
	NC_002505	2059741	snp	C	T	NC_002505_2059741_snp_C_T	CDS	+	524/765	175/254	missense_variant c.524C>T p.Ala175Val	VC_RS09205	.	hypothetical protein	0.00049975	0	100	100	100	100	100	100
	NC_002505	530265	snp	T	C	NC_002505_530265_snp_T_C	CDS	+	527/600	176/199	missense_variant c.527T>C p.Val176Ala	VC_RS02530	.	inovirus Gp2 family protein	0.00049975	0	0	0	0	0	0	100
	NC_002505	1627292	snp	A	C	NC_002505_1627292_snp_A_C	CDS	-	535/2855	179/950	missense_variant c.535T>G p.Ser179Ala	VC_RS07315	.	formate dehydrogenase subunit alpha	0.00049975	0	0	0	100	100	100	0
	NC_002505	427291	snp	A	G	NC_002505_427291_snp_A_G	CDS	+	560/651	187/216	missense_variant c.560A>G p.His187Arg	VC_RS02025	gspM	type II secretion system protein GspM	0.00049975	50	100	100	100	100	100	100
	NC_002506	773493	snp	T	A	NC_002506_773493_snp_T_A	CDS	-	56/795	19/264	missense_variant c.56A>T p.Gln19Leu	VC_RS17290	phhA	phenylalanine 4-monooxygenase	0.00049975	0	0	0	0	0	89.4737	0
	NC_002506	989172	snp	C	T	NC_002506_989172_snp_C_T	CDS	+	571/798	191/265	missense_variant c.571C>T p.Pro191Ser	VC_RS18240	.	amino acid ABC transporter permease	0.00049975	0	0	0	0	0	83.1579	0
	NC_002505	64791	snp	C	T	NC_002505_64791_snp_C_T	CDS	+	572/771	191/256	missense_variant c.572C>T p.Ala191Val	VC_RS00325	.	thiazole synthase	0.00049975	0	61.9048	100	100	99.2806	95.7895	96.4602
	NC_002505	681574	snp	G	T	NC_002505_681574_snp_G_T	CDS	+	587/1341	196/446	missense_variant c.587G>T p.Arg196Leu	VC_RS03230	glmM	phosphoglucosamine mutase	0.00049975	0	0	0	0	100	100	0
	NC_002505	1567284	snp	G	T	NC_002505_1567284_snp_G_T	CDS	-	58/375	20/124	missense_variant c.58C>A p.His20Asn	VC_RS07050	ctxB	cholera enterotoxin binding subunit CtxB	0.00049975	0	95.2381	100	100	100	100	0
	NC_002505	2670233	snp	T	C	NC_002505_2670233_snp_T_C	CDS	+	58/1551	20/516	missense_variant c.58T>C p.Ser20Pro	VC_RS11990	leuA	2-isopropylmalate synthase	0.00049975	0	0	0	100	100	100	0
	NC_002505	93723	snp	G	A	NC_002505_93723_snp_G_A	CDS	-	596/855	199/284	missense_variant c.596C>T p.Thr199Ile	VC_RS00465	ubiA	4-hydroxybenzoate octaprenyltransferase	0.00049975	0	61.9048	98.0769	100	100	100	100
	NC_002505	994229	snp	G	A	NC_002505_994229_snp_G_A	CDS	+	602/2874	201/957	missense_variant c.602G>A p.Gly201Asp	VC_RS04620	.	beta-prism lectin domain-containing protein	0.00049975	0	0	0	0	100	0	0
	NC_002506	62965	snp	C	T	NC_002506_62965_snp_C_T	CDS	+	614/954	205/317	missense_variant c.614C>T p.Ala205Val	VC_RS13655	.	DUF523 and DUF1722 domain-containing protein	0.013993	83.3333	100	98.0769	100	100	100	100
	NC_002505	2720712	snp	G	A	NC_002505_2720712_snp_G_A	CDS	-	623/1593	208/530	missense_variant c.623C>T p.Ala208Val	VC_RS12245	thiP	thiamine/thiamine pyrophosphate ABC transporter permease ThiP	0.00049975	0	100	100	100	100	100	100
	NC_002505	1730230	snp	T	G	NC_002505_1730230_snp_T_G	CDS	-	629/870	210/289	missense_variant c.629A>C p.Glu210Ala	VC_RS07835	.	LysR family transcriptional regulator	0.00049975	16.6667	76.1905	42.3077	56	60.4317	35.7895	46.0177
	NC_002505	798976	snp	T	C	NC_002505_798976_snp_T_C	CDS	-	650/804	217/267	missense_variant c.650A>G p.Glu217Gly	VC_RS03735	suhB	inositol-1-monophosphatase	0.00049975	0	0	0	0	100	100	0
	NC_002505	1368678	snp	G	A	NC_002505_1368678_snp_G_A	CDS	-	658/702	220/233	missense_variant c.658C>T p.His220Tyr	VC_RS06295	.	3'-5' exonuclease	0.00049975	16.6667	100	100	100	100	100	100
	NC_002505	2742475	snp	G	A	NC_002505_2742475_snp_G_A	CDS	-	674/867	225/288	missense_variant c.674C>T p.Ala225Val	VC_RS12345	cobA	uroporphyrinogen-III C-methyltransferase	0.00049975	0	0	0	100	100	100	0
	NC_002505	1682925	snp	C	T	NC_002505_1682925_snp_C_T	CDS	-	676/1338	226/445	missense_variant c.676G>A p.Ala226Thr	VC_RS07590	.	cytochrome ubiquinol oxidase subunit I	0.00049975	16.6667	85.7143	100	100	100	100	100
	NC_002505	544447	snp	C	T	NC_002505_544447_snp_C_T	CDS	+	68/798	23/265	missense_variant c.68C>T p.Ser23Phe	VC_RS02605	.	AraC family transcriptional regulator	0.00049975	83.3333	0	0	0	0	0	0
	NC_002506	161094	snp	T	G	NC_002506_161094_snp_T_G	CDS	+	721/2142	241/713	missense_variant c.721T>G p.Ser241Ala	VC_RS14055	.	TRAP transporter permease	0.00049975	0	0	0	0	0	89.4737	0
	NC_002505	2391706	snp	G	A	NC_002505_2391706_snp_G_A	CDS	+	737/1599	246/532	missense_variant c.737G>A p.Gly246Asp	VC_RS10810	.	LysM peptidoglycan-binding domain-containing protein	0.00049975	0	57.1429	98.0769	92	84.8921	90.5263	0
	NC_002505	545919	snp	T	G	NC_002505_545919_snp_T_G	CDS	+	746/1881	249/626	missense_variant c.746T>G p.Leu249Trp	VC_RS02610	.	methyl-accepting chemotaxis protein	0.00049975	0	0	0	0	0	0	100
	NC_002505	1905668	snp	C	A	NC_002505_1905668_snp_C_A	CDS	-	78/2121	26/706	missense_variant c.78G>T p.Glu26Asp	VC_RS08515	zorA	anti-phage ZorAB system protein ZorA	0.00049975	0	100	100	100	100	100	100
	NC_002505	2731709	snp	G	A	NC_002505_2731709_snp_G_A	CDS	-	797/1716	266/571	missense_variant c.797C>T p.Thr266Ile	VC_RS12285	.	autotransporter assembly complex family protein	0.00049975	0	0	0	0	0	89.4737	0
	NC_002506	42229	snp	C	A	NC_002506_42229_snp_C_A	CDS	-	816/831	272/276	missense_variant c.816G>T p.Gln272His	VC_RS13570	.	HDOD domain-containing protein	0.00049975	0	100	100	100	100	100	100
	NC_002505	2195049	snp	C	A	NC_002505_2195049_snp_C_A	CDS	-	830/1215	277/404	missense_variant c.830G>T p.Gly277Val	VC_RS09805	.	Hpt domain-containing protein	0.00049975	0	0	0	0	0	100	0
	NC_002505	2814292	snp	T	C	NC_002505_2814292_snp_T_C	CDS	-	847/1215	283/404	missense_variant c.847A>G p.Thr283Ala	VC_RS12740	.	argininosuccinate synthase	0.00049975	0	0	0	0	0	0	100
	NC_002506	414464	snp	A	C	NC_002506_414464_snp_A_C	CDS	+	84/228	28/75	missense_variant c.84A>C p.Lys28Asn	VC_RS15640	.	DUF1289 domain-containing protein	0.00049975	0	0	100	0	0	0	0
	NC_002505	1809120	snp	A	C	NC_002505_1809120_snp_A_C	CDS	-	858/1080	286/359	missense_variant c.858T>G p.Phe286Leu	VC_RS08100	.	efflux RND transporter periplasmic adaptor subunit	0.00049975	16.6667	23.8095	55.7692	44	39.5683	64.2105	53.9823
	NC_002506	398116	snp	G	T	NC_002506_398116_snp_G_T	CDS	+	85/477	29/158	missense_variant c.85G>T p.Gly29Cys	VC_RS15505	.	GNAT family N-acetyltransferase	0.00049975	0	0	0	100	100	100	0
	NC_002505	1834489	snp	C	T	NC_002505_1834489_snp_C_T	CDS	+	88/399	30/132	missense_variant c.88C>T p.Leu30Phe	VC_RS08245	.	GspS/AspS pilotin family protein	0.00049975	0	0	0	100	100	100	0
	NC_002506	58725	snp	G	A	NC_002506_58725_snp_G_A	CDS	-	907/1488	303/495	missense_variant c.907C>T p.Pro303Ser	VC_RS13640	.	hypothetical protein	0.00049975	0	0	0	0	0	0	100
	NC_002506	1040260	snp	T	C	NC_002506_1040260_snp_T_C	CDS	-	959/1671	320/556	missense_variant c.959A>G p.Asp320Gly	VC_RS18450	.	DUF342 domain-containing protein	0.00049975	0	0	0	0	0	0	70.7965
	NC_002505	2085882	snp	C	T	NC_002505_2085882_snp_C_T	CDS	+	968/1833	323/610	missense_variant c.968C>T p.Ala323Val	VC_RS09320	.	bifunctional diguanylate cyclase/phosphodiesterase	0.00049975	0	0	0	60	99.2806	100	0
	NC_002505	2839114	snp	A	T	NC_002505_2839114_snp_A_T	CDS	+	970/1383	324/460	missense_variant c.970A>T p.Ser324Cys	VC_RS12865	.	MATE family efflux transporter	0.00049975	0	100	100	100	100	100	100
	NC_002505	674880	snp	C	T	NC_002505_674880_snp_C_T	CDS	-	974/1026	325/341	missense_variant c.974G>A p.Gly325Asp	VC_RS03200	ompU	porin OmpU	0.00049975	0	95.2381	100	100	100	100	0
	NC_002505	1344013	snp	C	T	NC_002505_1344013_snp_C_T	CDS	+	976/1572	326/523	missense_variant c.976C>T p.Pro326Ser	VC_RS06185	.	murein L,D-transpeptidase	0.00049975	0	0	0	0	86.3309	0	0
	NC_002505	1563748	snp	G	A	NC_002505_1563748_snp_G_A	CDS	+	13602/13638	4534/4545	stop_gained c.13602G>A p.Trp4534*	VC_RS07025	rtxA	MARTX multifunctional-autoprocessing repeats-in-toxin holotoxin RtxA	0.00049975	16.6667	90.4762	100	100	100	100	100
	NC_002505	1822858	snp	C	T	NC_002505_1822858_snp_C_T	CDS	-	1631/1737	544/578	stop_gained c.1631G>A p.Trp544*	VC_RS18835	.	glycoside hydrolase family 36 protein	0.0104948	83.3333	100	100	100	100	100	100
	NC_002506	685842	snp	G	T	NC_002506_685842_snp_G_T	CDS	-	95/306	32/101	stop_gained c.95C>A p.Ser32*	VC_RS16890	.	GIY-YIG nuclease family protein	0.00049975	0	100	100	100	100	100	100
	NC_002505	1827199	snp	G	A	NC_002505_1827199_snp_G_A	CDS	-	1167/1185	389/394	synonymous_variant c.1167C>T p.Phe389Phe	VC_RS08190	torC	pentaheme c-type cytochrome TorC	0.00049975	16.6667	0	1.92308	100	99.2806	100	36.2832
	NC_002505	1604264	snp	T	C	NC_002505_1604264_snp_T_C	CDS	-	1224/2607	408/868	synonymous_variant c.1224A>G p.Lys408Lys	VC_RS07225	pepN	aminopeptidase N	0.00049975	0	0	0	100	100	100	0
	NC_002505	825	snp	A	G	NC_002505_825_snp_A_G	CDS	-	1353/1362	451/453	synonymous_variant c.1353T>C p.Ile451Ile	VC_RS00010	mnmE	tRNA uridine-5-carboxymethylaminomethyl(34) synthesis GTPase MnmE	0.00049975	0	0	0	0	0	0	71.6814
	NC_002505	1429844	snp	T	C	NC_002505_1429844_snp_T_C	CDS	+	1374/1398	458/465	synonymous_variant c.1374T>C p.Ala458Ala	VC_RS06530	.	bifunctional NUDIX hydrolase/phosphatase PAP2 family protein	0.00049975	0	80.9524	100	100	100	100	0
	NC_002506	737696	snp	A	G	NC_002506_737696_snp_A_G	CDS	+	153/294	51/97	synonymous_variant c.153A>G p.Gln51Gln	VC_RS17140	.	hypothetical protein	0.00049975	0	0	0	0	0	0	100
	NC_002506	820659	snp	C	T	NC_002506_820659_snp_C_T	CDS	+	157/183	53/60	synonymous_variant c.157C>T p.Leu53Leu	VC_RS17460	.	hypothetical protein	0.00049975	0	61.9048	100	100	100	100	0
	NC_002505	1786022	snp	C	A	NC_002505_1786022_snp_C_A	CDS	-	159/3441	53/1146	synonymous_variant c.159G>T p.Ala53Ala	VC_RS08000	.	ATP-binding protein	0.00049975	0	100	100	100	100	100	100
	NC_002506	724602	snp	A	G	NC_002506_724602_snp_A_G	CDS	-	1617/2448	539/815	synonymous_variant c.1617T>C p.Gly539Gly	VC_RS17085	.	ABC transporter permease	0.00049975	0	0	100	0	0	0	0
	NC_002505	2364863	snp	A	G	NC_002505_2364863_snp_A_G	CDS	+	165/507	55/168	synonymous_variant c.165A>G p.Leu55Leu	VC_RS10695	.	Fe3+-citrate ABC transporter substrate-binding protein	0.00049975	0	100	100	100	100	100	100
	NC_002505	1830635	snp	C	T	NC_002505_1830635_snp_C_T	CDS	+	168/234	56/77	synonymous_variant c.168C>T p.Tyr56Tyr	VC_RS08210	.	TIGR02647 family protein	0.00049975	0	0	0	100	100	100	0
	NC_002505	1961274	snp	C	T	NC_002505_1961274_snp_C_T	CDS	+	177/441	59/146	synonymous_variant c.177C>T p.Asp59Asp	VC_RS08785	.	PTS sugar transporter subunit IIA	0.00049975	0	0	0	0	84.8921	0	0
	NC_002506	422960	snp	C	T	NC_002506_422960_snp_C_T	CDS	+	177/669	59/222	synonymous_variant c.177C>T p.Gly59Gly	VC_RS15730	.	hypothetical protein	0.00049975	0	100	100	100	100	100	100
	NC_002505	1970973	snp	A	G	NC_002505_1970973_snp_A_G	CDS	-	183/453	61/150	synonymous_variant c.183T>C p.Gly61Gly	VC_RS08825	.	L-alanine exporter AlaE	0.00049975	0	0	0	60	100	100	0
	NC_002505	120682	snp	C	T	NC_002505_120682_snp_C_T	CDS	+	189/831	63/276	synonymous_variant c.189C>T p.Arg63Arg	VC_RS00585	dapF	diaminopimelate epimerase	0.00049975	0	0	0	0	0	82.1053	0
	NC_002505	653278	snp	C	T	NC_002505_653278_snp_C_T	CDS	-	189/984	63/327	synonymous_variant c.189G>A p.Ala63Ala	VC_RS03125	.	ABC transporter ATP-binding protein	0.00049975	0	0	0	0	0	0	77.8761
	NC_002505	1118265	snp	G	A	NC_002505_1118265_snp_G_A	CDS	+	2064/2127	688/708	synonymous_variant c.2064G>A p.Glu688Glu	VC_RS05150	fadJ	fatty acid oxidation complex subunit alpha FadJ	0.00049975	0	0	0	0	100	0	0
	NC_002505	2468430	snp	T	A	NC_002505_2468430_snp_T_A	CDS	-	207/2121	69/706	synonymous_variant c.207A>T p.Ala69Ala	VC_RS11185	recD	exodeoxyribonuclease V subunit alpha	0.00049975	0	0	0	0	0	92.6316	0
	NC_002505	1418186	snp	A	G	NC_002505_1418186_snp_A_G	CDS	-	207/972	69/323	synonymous_variant c.207T>C p.Gly69Gly	VC_RS06490	.	tripartite tricarboxylate transporter substrate binding protein	0.0149925	83.3333	95.2381	100	100	100	100	100
	NC_002505	482966	snp	G	A	NC_002505_482966_snp_G_A	CDS	-	219/273	73/90	synonymous_variant c.219C>T p.Phe73Phe	VC_RS02315	.	oxidative damage protection protein	0.00049975	0	0	0	0	0	0	100
	NC_002505	1548631	snp	A	G	NC_002505_1548631_snp_A_G	CDS	-	232/2106	78/701	synonymous_variant c.232T>C p.Leu78Leu	VC_RS07010	rtxB	RTX toxin T1SS ABC transporter subunit RtxB	0.00049975	66.6667	95.2381	98.0769	100	99.2806	100	100
	NC_002506	350647	snp	G	A	NC_002506_350647_snp_G_A	CDS	+	252/579	84/192	synonymous_variant c.252G>A p.Lys84Lys	VC_RS15115	.	hypothetical protein	0.00049975	0	61.9048	100	100	100	100	0
	NC_002505	137214	snp	T	C	NC_002505_137214_snp_T_C	CDS	+	261/1176	87/391	synonymous_variant c.261T>C p.Ser87Ser	VC_RS00675	ftsY	signal recognition particle-docking protein FtsY	0.00049975	66.6667	0	0	0	0	0	0
	NC_002505	838652	snp	C	T	NC_002505_838652_snp_C_T	CDS	+	276/1983	92/660	synonymous_variant c.276C>T p.Leu92Leu	VC_RS03920	.	alkyl/aryl-sulfatase	0.00049975	0	0	100	0	0	0	0
	NC_002505	1686986	snp	A	T	NC_002505_1686986_snp_A_T	CDS	-	297/318	99/105	synonymous_variant c.297T>A p.Ile99Ile	VC_RS07615	yqfB	N(4)-acetylcytidine aminohydrolase	0.0124938	83.3333	100	98.0769	100	100	100	100
	NC_002505	2176974	snp	T	A	NC_002505_2176974_snp_T_A	CDS	-	312/951	104/316	synonymous_variant c.312A>T p.Pro104Pro	VC_RS09740	.	beta-ketoacyl-ACP synthase III	0.00049975	0	0	100	0	0	0	0
	NC_002505	2357516	snp	G	A	NC_002505_2357516_snp_G_A	CDS	-	3144/7253	1048/2416	synonymous_variant c.3144C>T p.Ile1048Ile	VC_RS10680	.	amino acid adenylation domain-containing protein	0.00049975	0	0	0	0	0	0	83.1858
	NC_002506	253943	snp	T	C	NC_002506_253943_snp_T_C	CDS	+	330/1979	110/658	synonymous_variant c.330T>C p.Ile110Ile	VC_RS14445	vctA	TonB-dependent iron chelate receptor VctA	0.00049975	0	0	0	0	0	0	77.8761
	NC_002505	2787401	snp	T	G	NC_002505_2787401_snp_T_G	CDS	-	339/1212	113/403	synonymous_variant c.339A>C p.Ala113Ala	VC_RS12625	.	aspartate aminotransferase family protein	0.00049975	0	100	100	100	100	100	100
	NC_002505	14295	snp	C	T	NC_002505_14295_snp_C_T	CDS	+	351/423	117/140	synonymous_variant c.351C>T p.Ala117Ala	VC_RS00070	.	hypothetical protein	0.00049975	0	0	0	0	0	0	100
	NC_002506	839769	snp	A	G	NC_002506_839769_snp_A_G	CDS	-	351/1194	117/397	synonymous_variant c.351T>C p.Gly117Gly	VC_RS17550	.	glycine C-acetyltransferase	0.00049975	0	0	0	0	0	89.4737	0
	NC_002505	2484852	snp	C	T	NC_002505_2484852_snp_C_T	CDS	+	381/942	127/313	synonymous_variant c.381C>T p.Gly127Gly	VC_RS11235	.	zinc transporter ZntB	0.00049975	0	57.1429	96.1538	36	16.5468	32.6316	88.4956
	NC_002505	953331	snp	T	G	NC_002505_953331_snp_T_G	CDS	+	390/1452	130/483	synonymous_variant c.390T>G p.Gly130Gly	VC_RS04430	thiI	tRNA uracil 4-sulfurtransferase ThiI	0.00049975	0	61.9048	96.1538	100	99.2806	96.8421	0
	NC_002505	925762	snp	C	T	NC_002505_925762_snp_C_T	CDS	+	414/1233	138/410	synonymous_variant c.414C>T p.Gly138Gly	VC_RS04290	.	hypothetical protein	0.009995	83.3333	100	100	100	100	100	100
	NC_002505	2241989	snp	A	G	NC_002505_2241989_snp_A_G	CDS	+	459/789	153/262	synonymous_variant c.459A>G p.Val153Val	VC_RS10025	znuC	zinc ABC transporter ATP-binding protein ZnuC	0.00049975	0	0	0	0	0	92.6316	0
	NC_002505	1808852	snp	G	A	NC_002505_1808852_snp_G_A	CDS	-	54/3099	18/1032	synonymous_variant c.54C>T p.Ala18Ala	VC_RS08095	vexK	efflux RND transporter permease subunit VexK	0.00049975	16.6667	28.5714	55.7692	48	61.1511	64.2105	65.4867
	NC_002505	2424759	snp	C	T	NC_002505_2424759_snp_C_T	CDS	-	558/654	186/217	synonymous_variant c.558G>A p.Leu186Leu	VC_RS10965	.	riboflavin synthase	0.00049975	0	100	100	100	100	100	100
	NC_002505	2002816	snp	G	A	NC_002505_2002816_snp_G_A	CDS	-	660/777	220/258	synonymous_variant c.660C>T p.Arg220Arg	VC_RS08990	.	ABC transporter substrate-binding protein	0.00049975	0	57.1429	100	100	100	100	0
	NC_002505	749095	snp	C	T	NC_002505_749095_snp_C_T	CDS	+	711/1947	237/648	synonymous_variant c.711C>T p.Ser237Ser	VC_RS03525	sltY	murein transglycosylase	0.00049975	50	90.4762	100	92	100	98.9474	100
	NC_002505	708714	snp	G	A	NC_002505_708714_snp_G_A	CDS	+	738/1314	246/437	synonymous_variant c.738G>A p.Ser246Ser	VC_RS03355	brnQ	branched-chain amino acid transport system II carrier protein	0.00049975	50	95.2381	98.0769	100	100	100	100
	NC_002505	139591	snp	T	C	NC_002505_139591_snp_T_C	CDS	+	750/993	250/330	synonymous_variant c.750T>C p.Tyr250Tyr	VC_RS00685	ftsX	permease-like cell division protein FtsX	0.00049975	0	95.2381	100	100	100	100	0
	NC_002505	710240	snp	G	T	NC_002505_710240_snp_G_T	CDS	+	780/1098	260/365	synonymous_variant c.780G>T p.Ala260Ala	VC_RS03360	prfB	peptide chain release factor 2	0.00049975	50	95.2381	98.0769	100	99.2806	100	100
	NC_002506	564621	snp	C	T	NC_002506_564621_snp_C_T	CDS	+	823/2169	275/722	synonymous_variant c.823C>T p.Leu275Leu	VC_RS16385	.	SEC-C metal-binding domain-containing protein	0.00049975	0	0	0	0	0	0	97.3451
	NC_002505	486234	snp	T	G	NC_002505_486234_snp_T_G	CDS	+	906/921	302/306	synonymous_variant c.906T>G p.Gly302Gly	VC_RS02330	glsB	glutaminase B	0.00049975	0	90.4762	100	100	100	100	0
	NC_002505	1981925	snp	G	A	NC_002505_1981925_snp_G_A	CDS	-	909/1137	303/378	synonymous_variant c.909C>T p.Phe303Phe	VC_RS08890	cydB	cytochrome d ubiquinol oxidase subunit II	0.00049975	0	80.9524	0	0	0	0	0
	NC_002505	744709	snp	G	A	NC_002505_744709_snp_G_A	CDS	+	90/1128	30/375	synonymous_variant c.90G>A p.Val30Val	VC_RS03510	tyrA	bifunctional chorismate mutase/prephenate dehydrogenase	0.00049975	0	100	100	100	100	100	0
	NC_002505	72585	snp	G	A	NC_002505_72585_snp_G_A	CDS	+	924/2157	308/718	synonymous_variant c.924G>A p.Lys308Lys	VC_RS00360	.	EAL domain-containing protein	0.00049975	66.6667	0	0	0	0	0	0
	NC_002505	2078472	snp	C	T	NC_002505_2078472_snp_C_T	CDS	+	936/1341	312/446	synonymous_variant c.936C>T p.Ile312Ile	VC_RS09290	.	sigma-54 dependent transcriptional regulator	0.00049975	0	0	0	0	0.719424	0	76.9912
	NC_002505	1830897	snp	C	T	NC_002505_1830897_snp_C_T	CDS	+	93/831	31/276	synonymous_variant c.93C>T p.Arg31Arg	VC_RS08215	.	NAD(P)H-binding protein	0.00049975	0	0	0	0	0	0	100
	NC_002505	2716408	snp	G	A	NC_002505_2716408_snp_G_A	CDS	+	954/1362	318/453	synonymous_variant c.954G>A p.Ala318Ala	VC_RS12225	mgtE	magnesium transporter	0.00049975	0	0	100	100	100	98.9474	0
	NC_002505	2927523	snp	G	T	NC_002505_2927523_snp_G_T	CDS	+	975/1005	325/334	synonymous_variant c.975G>T p.Ala325Ala	VC_RS13250	add	adenosine deaminase	0.00049975	0	0	0	0	0	0	100
	NC_002505	2203897	snp	C	T	NC_002505_2203897_snp_C_T	CDS	+	9/504	3/167	synonymous_variant c.9C>T p.Val3Val	VC_RS09855	.	VC2046/SO_2500 family protein	0.00049975	0	100	100	100	100	100	100

## Sheet: Suppl Table 6
Supplementary Table 6. Confirmed cholera cases in the years 1996-2010 and 2011-2024
year_group	median	min	max	total_cases	W	P-value
1996-2010	536	284	1109	8273	192	<0.001
2011-2024	265.5	104	575	3982
Wilcoxon rank sum test was perfomred for testing statistical difference between the year groups

## Sheet: Suppl Table 7
Supplementary Table 7. Confirmed cholera cases in the years 1996-2010 and 2011-2024
year_group	season	median	min	max	total_cases	percent	chi_sq_statistic	p_value
1996-2010	Pre-monsoon (March-May)	162	102	300	2849	34.4	85.68	2.48e-19
	Post-monsoon (September-November)	137	66	380	2532	30.6
	Off-peak	169	85	448	2892	35
2011-2024	Pre-monsoon (March-May)	89.5	12	350	1705	42.8
	Post-monsoon (September-November)	73	33	176	999	25.1
	Off-peak	87	55	136	1278	32.1

## Sheet: Suppl Table 8
Supplementary Table 8. Summary statistics of cholera postive patients factors
Factor	year_group	Factor_level	median	min	max	total_cases	percent	chi_sq	p_value
Age	1996-2010	Infants (0-4 years)	133	77	340	2140	25.9	329.81	<0.001
		Children (5-14 years)	93	50	213	1435	17.3
		Adults (15-49 years)	226	129	481	4008	48.4
		Older Adults (50+)	46	25	75	690	8.3
	2011-2024	Infants (0-4 years)	45.5	18	101	652	16.4
		Children (5-14 years)	30.5	9	54	399	10
		Adults (15-49 years)	159	66	339	2457	61.7
		Older Adults (50+)	27	10	84	473	11.9
Sex	1996-2010	Female	235	136	502	3709	44.8	25.66	<0.001
		Male	301	148	607	4564	55.2
	2011-2024	Female	104	36	242	1600	40.2
		Male	156	68	333	2381	59.8
EDUFATH	1996-2010	1-3 yrs	14	11	23	237	2.9	581.56	<0.001
		10-12 yrs	37	14	88	585	7.1
		4-5 yrs	53	20	109	810	9.8
		6-10 yrs	71	27	155	1037	12.5
		>12 yrs	16	8	32	266	3.2
		Maktab	1	1	3	11	0.1
		None	333	204	699	5326	64.4
	2011-2024	1-3 yrs	8.5	1	15	109	2.7
		10-12 yrs	19.5	7	40	284	7.1
		4-5 yrs	36	13	51	459	11.5
		6-10 yrs	27.5	10	58	422	10.6
		>12 yrs	12.5	1	25	163	4.1
		Maktab	26	2	51	272	6.8
		Muktab	1	1	1	1	0
		None	141	68	414	2266	56.9
		Unk	2.5	2	3	5	0.1
AREA	1996-2010	R/A	1	1	11	28	0.3	685.36	<0.001
		V/A	177	107	388	2863	34.6
		basti	60	23	188	1049	12.7
		common H/A	253	130	522	4272	51.6
		others	4	1	13	59	0.7
	2011-2024	R/A	2.5	1	10	21	0.5
		V/A	43.5	16	82	624	15.7
		basti	20	3	49	283	7.1
		common H/A	186.5	81	479	3021	75.9
		others	2.5	1	7	31	0.8
Household FLOOR	1996-2010	Cemented	289	141	521	4943	59.7	1106.86	<0.001
		Non	203	100	588	3327	40.2
	2011-2024	Cemented	229.5	98	530	3554	89.3
		Non	30	5	58	425	10.7
Household WALL	1996-2010	Bamboo	88	21	428	1833	22.2	2506.03	<0.001
		Brick	232	109	460	4090	49.4
		Corrugated tin	126	39	205	1500	18.1
		Jute stick	2	1	8	22	0.3
		Mixed	8	5	23	131	1.6
		Mixed/other	1.5	1	2	3	0
		Mud	9	5	29	155	1.9
		Ordinary Tin	2	1	4	20	0.2
		Other	2.5	1	6	32	0.4
		Straw	1	1	2	4	0
	2011-2024	Bamboo	3	1	14	54	1.4
		Brick	192.5	90	461	3116	78.3
		Corrugated tin	13	11	15	26	0.7
		Mixed/other	1	1	2	5	0.1
		Ordinary Tin	11	9	13	22	0.6
		Tin	4.5	1	37	77	1.9
Household Roof	1996-2010	Bamboo	4	1	7	46	0.6	4350.06	<0.001
		Concrete	87	43	201	1639	19.8
		Corrugated tin	419	231	848	5247	63.4
		Dont know	1	1	4	7	0.1
		Mixed	7	1	44	151	1.8
		Mixed/other	1	1	1	1	0
		Ordinary tin	3.5	1	13	34	0.4
		Other	1	1	4	13	0.2
		Polythene	1	1	1	5	0.1
		Straw	4	1	6	24	0.3
		Tin	1	1	1	1	0
	2011-2024	Bamboo	1	1	3	8	0.2
		Concrete	101	50	263	1724	43.3
		Corrugated tin	84.5	70	99	169	4.2
		Mixed/other	2.5	1	4	10	0.3
		Other	3.5	2	5	7	0.2
		Tin	1	1	11	13	0.3
Toilet facility	1996-2010	Dughole	114	62	242	1927	23.3	1588.57	<0.001
		Hanging	32	3	151	682	8.2
		No fixed place	2	1	3	16	0.2
		Open pit	63	24	164	980	11.8
		Sanitary	3	1	37	87	1.1
		Semi-sanitary	273	138	575	4567	55.2
		Service	1	1	6	13	0.2
	2011-2024	Dughole	20	4	45	322	8.1
		Hanging	1	1	1	5	0.1
		No fixed place	1	1	1	2	0.1
		Open pit	2	1	4	17	0.4
		Sanitary	3	1	39	108	2.7
		Semi-sanitary	229.5	91	537	3519	88.4
		Service	2	1	3	6	0.2
Dehydration	1996-2010	Mild to moderate dehydration	143	86	339	2406	29.1	198.03	<0.001
		No dehydration	42	17	211	892	10.8
		Severe dehydration	293	166	559	4968	60.1
	2011-2024	Mild to moderate dehydration	58	22	92	764	19.2
		No dehydration	16.5	8	56	310	7.8
		Severe dehydration	188	74	427	2907	73
Stool character	1996-2010	Non watery	5	2	20	86	1	2.55	0.466
		Watery	534	282	1089	8186	98.9
	2011-2024	Non watery	1.5	1	16	38	1
		Watery	264.5	104	573	3942	99
Mucus or Blood in Stool	1996-2010	Blood	1	1	1	7	0.1	5.9	0.206
		Mu+bl	3	1	7	30	0.4
		Mucus	29	17	110	594	7.2
		None	514	261	995	7640	92.3
	2011-2024	Blood	1	1	2	7	0.2
		Mu+bl	1	1	2	9	0.2
		Mucus	18.5	4	32	256	6.4
		None	251	93	544	3709	93.1
Number of Stool	1996-2010	3-5 times	35	20	82	561	6.8	849.54	<0.001
		6-10 times	173	100	381	2974	35.9
		11-15 times	182	106	400	2852	34.5
		16-20 times	73	37	151	1109	13.4
		21+ times	39	14	121	775	9.4
	2011-2024	3-5 times	10	4	23	160	4
		6-10 times	47.5	12	118	771	19.4
		11-15 times	80	38	138	1148	28.8
		16-20 times	65	26	270	1142	28.7
		21+ times	52	22	108	758	19
Vomiting	1996-2010	No	39	19	98	625	7.6	45.07	<0.001
		<10 times	398	214	821	6239	75.4
		>10 times	89	50	190	1407	17
	2011-2024	No	29	11	64	437	11
		<10 times	188	74	451	2956	74.2
		>10 times	34.5	11	87	588	14.8
Abdominal Pain	1996-2010	No	316	154	516	4417	53.4	91.71	<0.001
		Yes	261	130	593	3854	46.6
	2011-2024	No	106	46	310	1762	44.2
		Yes	152.5	40	288	2218	55.7
